# Supplementary material for: Diagnostic accuracy of an app-guided, self-administered test for influenza among individuals presenting to general practice with influenza-like illness: study protocol
Source: PubMed Central journal article supplement — BMJ Open. 2020 Nov 19;10(11):e036298. doi: 10.1136/bmjopen-2019-036298 (PMC7678361; doi:10.1136/bmjopen-2019-036298), 2020-11-19
Supplement: bmjopen-2019-036298.draft_revisions.pdf [file bmjopen-2019-036298.draft_revisions.pdf]

# BMJ Open

BMJ Open is committed to open peer review. As part of this commitment we make the peer review history of every article we publish publicly available.

When an article is published we post the peer reviewers' comments and the authors' responses online. We also post the versions of the paper that were used during peer review. These are the versions that the peer review comments apply to.

The versions of the paper that follow are the versions that were submitted during the peer review process. They are not the versions of record or the final published versions. They should not be cited or distributed as the published version of this manuscript.

BMJ Open is an open access journal and the full, final, typeset and author-corrected version of record of the manuscript is available on our site with no access controls, subscription charges or pay-per-view fees (<http://bmjopen.bmj.com>).

If you have any questions on BMJ Open's open peer review process please email [info.bmjopen@bmj.com](mailto:info.bmjopen@bmj.com)

# BMJ Open

## Diagnostic accuracy of an app-guided, self-administered test for influenza among individuals presenting to general practice with influenza-like illness: Study protocol

|                               |                                                                                                                                                                                                                                                                                                                                                                                                                                                                                                                                                                                                                                                                                                                                                                                                                                                                                                                                   |
|-------------------------------|-----------------------------------------------------------------------------------------------------------------------------------------------------------------------------------------------------------------------------------------------------------------------------------------------------------------------------------------------------------------------------------------------------------------------------------------------------------------------------------------------------------------------------------------------------------------------------------------------------------------------------------------------------------------------------------------------------------------------------------------------------------------------------------------------------------------------------------------------------------------------------------------------------------------------------------|
| Journal:                      | <i>BMJ Open</i>                                                                                                                                                                                                                                                                                                                                                                                                                                                                                                                                                                                                                                                                                                                                                                                                                                                                                                                   |
| Manuscript ID                 | bmjopen-2019-036298                                                                                                                                                                                                                                                                                                                                                                                                                                                                                                                                                                                                                                                                                                                                                                                                                                                                                                               |
| Article Type:                 | Protocol                                                                                                                                                                                                                                                                                                                                                                                                                                                                                                                                                                                                                                                                                                                                                                                                                                                                                                                          |
| Date Submitted by the Author: | 09-Dec-2019                                                                                                                                                                                                                                                                                                                                                                                                                                                                                                                                                                                                                                                                                                                                                                                                                                                                                                                       |
| Complete List of Authors:     | Lyon, Victoria; University of Washington, Family Medicine;<br>Zigman Suchsland, Monica; University of Washington,<br>Chilver, Monique; The University of Adelaide<br>Stocks, Nigel; University of Adelaide, Discipline of General Practice<br>Lutz, Barry; University of Washington, Bioengineering<br>Su, Philip<br>Cooper, Shawna<br>Park, Chunjong; University of Washington, Computer Science<br>Lavitt, Libby Rose; University of Washington, Computer Science<br>Mariakakis, Alex; University of Washington, Computer Science<br>Patel, Shwetak ; University of Washington, Computer Science<br>Graham, Chelsey; University of Washington, 6. Brotman Bay Institute for<br>Precision Medicine<br>Rieder, Mark; University of Washington, Brotman Baty Institute<br>LeRouge, Cynthia; Florida International University, College of Business<br>Thompson, Matthew; University of Washington, Department of Family<br>Medicine |
| Keywords:                     | BIOTECHNOLOGY & BIOINFORMATICS, Diagnostic microbiology <<br>INFECTIOUS DISEASES, Infection control < INFECTIOUS DISEASES,<br>Molecular diagnostics < INFECTIOUS DISEASES, Public health <<br>INFECTIOUS DISEASES                                                                                                                                                                                                                                                                                                                                                                                                                                                                                                                                                                                                                                                                                                                 |
|                               |                                                                                                                                                                                                                                                                                                                                                                                                                                                                                                                                                                                                                                                                                                                                                                                                                                                                                                                                   |

SCHOLARONE™  
Manuscripts

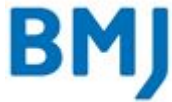

I, the Submitting Author has the right to grant and does grant on behalf of all authors of the Work (as defined in the below author licence), an exclusive licence and/or a non-exclusive licence for contributions from authors who are: i) UK Crown employees; ii) where BMJ has agreed a CC-BY licence shall apply, and/or iii) in accordance with the terms applicable for US Federal Government officers or employees acting as part of their official duties; on a worldwide, perpetual, irrevocable, royalty-free basis to BMJ Publishing Group Ltd ("BMJ") its licensees and where the relevant Journal is co-owned by BMJ to the co-owners of the Journal, to publish the Work in this journal and any other BMJ products and to exploit all rights, as set out in our [licence](#).

The Submitting Author accepts and understands that any supply made under these terms is made by BMJ to the Submitting Author unless you are acting as an employee on behalf of your employer or a postgraduate student of an affiliated institution which is paying any applicable article publishing charge ("APC") for Open Access articles. Where the Submitting Author wishes to make the Work available on an Open Access basis (and intends to pay the relevant APC), the terms of reuse of such Open Access shall be governed by a Creative Commons licence – details of these licences and which [Creative Commons](#) licence will apply to this Work are set out in our licence referred to above.

Other than as permitted in any relevant BMJ Author's Self Archiving Policies, I confirm this Work has not been accepted for publication elsewhere, is not being considered for publication elsewhere and does not duplicate material already published. I confirm all authors consent to publication of this Work and authorise the granting of this licence.

# Diagnostic accuracy of an app-guided, self-administered test for influenza among individuals presenting to general practice with influenza-like illness: Study protocol

**Corresponding Author:** Victoria Lyon. Department of Family Medicine, 4225 Roosevelt Way NE, 98105, Suite 309, Box 354696. University of Washington, Seattle, USA. Email: [vlyon@uw.edu](mailto:vlyon@uw.edu) Phone: 505-660-9500

## Full Author List:

Victoria Lyon, MPH<sup>1</sup>  
Monica Zigman Suchsland, MPH, PhD student<sup>1</sup>  
Monique Chilver, B.Sc. Mol. Biol, MPH, PhD student<sup>2</sup>  
Nigel Stocks, MD, BSc, MBBS, DipPH<sup>2</sup>  
Barry R. Lutz, PhD<sup>3</sup>  
Philip Su, B.Sc. <sup>5</sup>  
Shawna Cooper, BA<sup>5</sup>  
Chunjong Park, MS, PhD student<sup>4</sup>  
Libby Rose Lavitt, BA<sup>4</sup>  
Alex Mariakakis, PhD<sup>4</sup>  
Shwetak Patel, PhD<sup>4</sup>  
Chelsea Graham, MEng<sup>6</sup>  
Mark Rieder, PhD<sup>6</sup>  
Cynthia LeRouge, PhD<sup>7</sup>  
Matthew Thompson, MBChB, MPH, DPhil<sup>1</sup>

## Affiliations:

1. Department of Family Medicine, Box 354696, University of Washington, Seattle, USA
2. Discipline of General Practice, University of Adelaide, Australia.
3. Department of Bioengineering, Box 355061, University of Washington, Seattle, USA
4. Paul G Allen School of Computer Science and Engineering, University of Washington, Seattle, USA
5. Audere, 255 S King Street, Suite 9-104, Seattle, WA 98104, USA
6. Brotman Bay Institute for Precision Medicine, University of Washington, Seattle, USA
7. Department of Information Systems and Business Analytics, Florida International University, Miami, USA

**Word Count: 3,645**

**Keywords: Influenza, self-test, accuracy, ILI, ASPREN, RDT, rapid diagnostic, mobile app, smartphone, flu**

## ABSTRACT

**Introduction:** Diagnostic tests for influenza in Australia are currently only authorized for use in clinical settings. At-home diagnostic testing for influenza could reduce the need for patient contact with health care services, which potentially could contribute to symptomatic improvement and reduced spread of influenza. We aim to determine the accuracy of an app-guided nasal self-swab combined with a lateral flow immunoassay for influenza conducted by individuals with influenza-like illness (ILI).

**Methods and analysis:** Adults ( $\geq 18$  yr) presenting with ILI will be recruited by general practitioners (GP) participating in Australian Sentinel Practices Research Network (ASPREN). Eligible participants will have a nasal swab obtained by their GP for verification of influenza A/B status using RT-PCR at an accredited laboratory. Participants will receive an influenza test kit and will download an app that collects self-reported symptoms and influenza risk factors, then instructs them in obtaining a low-nasal self-swab, running a customized QuickVue influenza A+B lateral flow immunoassay (Quidel Corporation), and interpreting the results. Participants will also interpret an enhanced image of the test strip in the app. The primary outcome will be the accuracy of participants' test interpretation compared to the laboratory RT-PCR reference standard. Secondary analyses will include accuracy of the enhanced test strip image, accuracy of an automatic test strip reader algorithm, and validation of prediction rules for influenza based on self-reported symptoms. A post-test survey will be used to obtain participant feedback of self-test procedures.

**Ethics and dissemination:** The study was approved by the Human Research and Ethics Committee (HREC) at the University of Adelaide (H-2019-116). Protocol details and any amendments will be reported to <https://www.tga.gov.au/>. Results will be published in the peer reviewed literature, and shared with stakeholders in the primary care and diagnostics communities.

**Universal Trial Number (UTN):** U1111-1237-0688, registered on the Australia New Zealand Clinical Trial Registry:  
<https://www.anzctr.org.au/Trial/Registration/TrialReview.aspx?ACTRN=12619001087145>

## STRENGTHS AND LIMITATIONS OF THIS STUDY

- Accuracy of nasal self-testing for influenza using a customized version of the QuickVue Influenza A+B assay will be compared to reference standard of nasal or nasopharyngeal swab obtained by a GP and tested using RT-PCR.
- Recruitment will be nested within an ongoing Australian Surveillance Practices Research Network recruiting patients presenting to general practice with influenza-like illness (ILI)

- Patients attending primary care with ILI may differ in terms of disease spectrum compared to individuals with ILI at home, which is the population where the self-test is intended to be used.
- Self-swabbing of the nose, and conducting a lateral flow test unsupervised and guided by an app may select individuals with greater smartphone experience, manual dexterity, and/or sociodemographic status.
- Self-report of ILI symptoms using an app may differ from symptoms obtained from GP consultations or from research staff, limiting the ability to validate clinical prediction rules for influenza

## INTRODUCTION

Seasonal influenza occurs annually, causing disease with substantial morbidity and mortality worldwide, especially in the elderly and those with chronic disease.[1] Despite the availability of the influenza vaccine, repeated influenza infections are common throughout life, and result in a considerable healthcare burden. In Australia, it is estimated that each year influenza causes an average 310,000 general practitioner (GP) consultations, 18,000 hospital admissions, and 378 deaths.[2,3] Influenza places particular burden on primary care services during the winter months, contributing to high consultation rates for acute respiratory tract infections. Detection of influenza is thought to provide value clinically by identifying patients who may be at higher risk of complications, and also to potentially inform use of antivirals and efforts to reduce transmission.[4]

GPs generally diagnose influenza based on a combination of symptoms and risk factors present in each patient, and diagnostic confirmation requires a laboratory test.[4] Multiple tests are available for influenza, including immunoassays and molecular tests with varying levels of sophistication and cost, that can be used in different clinical settings.[5] While some point-of-care tests are approved for, and suitable in primary care settings, others can only be conducted in formal laboratory facilities.

Because there is considerable overlap in symptoms caused by influenza and other respiratory pathogens, many patients who are tested for influenza receive flu-negative results. To reduce the number of unnecessary tests that are requested by GPs, clinical prediction rules have been derived to stratify individuals more accurately than individual symptoms into those with various likelihood of influenza infection.[6] Currently there are no diagnostic tests for influenza that are approved for use by individuals outside of clinical settings in Australia or the United States. The ability to accurately test individuals at home for influenza could provide several potential advantages over current practice. One advantage for patients would be convenience by reducing the need for primary care consultations. Home-testing may also facilitate the earlier use of antivirals when they are most likely to provide beneficial effects on symptom resolution and reduce transmission, and help identify individuals at higher risk of complications compared to those with other causes of influenza-like illness (ILI). [7]

1  
2  
3 The aim of the current study is to determine the accuracy of a test for influenza that involves  
4 individuals self-swabbing their nose and conducting an immunoassay lateral flow test with  
5 guidance from a mobile app. We also aimed to explore additional methods for reading the test  
6 strip, and validating existing clinical prediction rules for influenza.  
7  
8  
9

## 10 **METHODS**

### 11 **Study Design**

12  
13  
14  
15 A prospective observational study of the comparative accuracy of a patient-run, mobile app-  
16 guided (see Appendix A), lateral flow test for influenza (a customized version of the QuickVue  
17 Influenza A + B assay test, from Quidel Corporation) using a low nasal self-swab (referred to in  
18 this protocol as 'flu@home'), compared to clinician-collected nasal or nasopharyngeal swab for  
19 influenza detected by a commercial RT-PCR. The Universal Trial Number (UTN) is U1111-  
20 1237-0688, registered on 6/08/2019. (See Figure 1).  
21  
22  
23

### 24 **Study population**

25 A consecutive sample of adult patients with ILI presenting to general practices participating in  
26 the Australia Sentinel Practices Research Network (ASPREN). (See Appendix B for ASPREN  
27 protocol).  
28  
29

### 30 **Inclusion and exclusion criteria**

31 Inclusion criteria are: 1) age  $\geq$  18 years, 2) presenting to ASPREN clinic sites [8] with fever,  
32 cough, and fatigue, 3) agree to have their GP/nurse practitioner obtain a nasal or  
33 nasopharyngeal swab for surveillance purposes, and 4) have their own Android or iOS  
34 smartphone or tablet. Exclusion criteria will be non-English speakers, people who are  
35 incarcerated, people highly dependent on medical care who may be unable to give consent, and  
36 people with a cognitive impairment, an intellectual disability or mental illness.  
37  
38  
39

### 40 **Recruitment**

41 Each clinic will recruit the first three adult patients presenting with ILI symptoms each week  
42 during the data collection period. Clinics will also recruit every ILI patient aged 65 years and  
43 older. Numbers of patients recruited will be monitored during the course of the study in order to  
44 determine whether this recruitment rate is sufficient fulfill study objectives, and increased if  
45 needed.  
46  
47

### 48 **Clinical setting**

49 Study participants will be recruited from practices participating in ASPREN, which is a network  
50 of sentinel GPs who report de-identified information on ILI as well as other infectious disease  
51 conditions.[8] The de-identified information will include date of symptom onset, influenza  
52 vaccination history, comorbidities related to influenza, and whether the patient is a health care  
53 worker. Data from ASPREN are used by State and Commonwealth Departments of Health for  
54 infectious disease surveillance and vaccine effectiveness estimates.[9] ASPREN data contribute  
55  
56  
57  
58  
59  
60

1  
2  
3 to the Global Influenza Vaccine Effectiveness Movement and the World Health Organization  
4 Collaborating Centre for Reference and Research on Influenza (WHO-CCRRRI).  
5  
6

## 7 **Outcome measurements**

### 8 Primary outcome

- 9 • Accuracy of detection of influenza A/B infection based on self-reading of the flu@home  
10 test compared to laboratory RT-PCR testing.  
11

### 12 Secondary outcomes

- 13 • Accuracy of detection of influenza A/B infection based on self-reading of an enhanced  
14 high contrast image of the flu@home test strip compared to laboratory RT-PCR testing.  
15
- 16 • Accuracy of detection of influenza A/B infection based on the app's automatic  
17 interpretation algorithm of the flu@home test strip image compared to laboratory PCR  
18 testing.  
19
- 20 • Accuracy of clinical prediction rules including the Flu Score [6] based on individual and  
21 combinations of presenting symptoms obtained from the app and/or the patient's GP  
22 compared to laboratory PCR testing.  
23
- 24 • Satisfaction and experience of users interacting with the flu@home app.  
25

### 26 Other variables

27 The app will collect information on demographics (age, sex, race), household composition,  
28 influenza vaccination history, risk factors for influenza infection, presence and duration of ILI  
29 symptoms (e.g., cough, fever, fatigue, chills or sweats), (see Appendix C).  
30

## 31 **Study procedures**

32 Patients who participate in the ASPREN study will be invited to participate in the flu@home self-  
33 testing study from July 2019 until all 2300 kits are distributed, no later than March 2020. Each  
34 participating GP will be provided with a set number of test kits, based on the numbers of ILI  
35 patients encountered in previous flu seasons, and the number of ILI patients swabbed during  
36 the current 2019 flu season. Participating GPs will be asked to recruit all patients who meet  
37 study eligibility criteria. After completing the standard ASPREN protocol (see Appendix B) will  
38 ask participants if they would like to participate in the flu@home study. Once participants  
39 consent, GPs will hand them the test kit and instructions for downloading the free app, and the  
40 patient will be asked to conduct the remainder of the study procedures at home on that day or  
41 the following day. A post-test survey will be sent to participants via the app 24-48 after they  
42 complete the test procedure.  
43  
44  
45  
46

## 47 **Influenza testing methods**

### 48 Home/self-testing

49 Patients will be provided with a self-test kit by their GP containing a customized version of the  
50 Quidel QuickVue Influenza A+B lateral flow test, and asked to download the free flu@home app  
51 [10] to their personal iOS or Android smartphone or tablet. Each test kit includes a unique 8-digit  
52 study ID number that will be linked to reference test results, but cannot be used to personally  
53 identify participants. The app collects the variables noted above through a questionnaire, and  
54 guides the patient through the self-swabbing and testing procedure. They will be instructed to  
55  
56  
57  
58  
59  
60



1  
2  
3 obtain a low nasal swab using a single foam-tipped swab inserted into each nostril, and then  
4 perform the steps to conduct the lateral flow test.  
5

6  
7 Having completed the test steps, the app guides the patient to read their test strip by first asking  
8 them whether they see a blue line (control line) and any pink lines (1<sup>st</sup> interpretation). A pink line  
9 above the blue line indicates influenza A, and a pink line below the blue control line indicates  
10 influenza B. If the patient indicates they do not see the blue control line, they are informed that  
11 they have a defective test strip and interpretation guidance is not provided. For patients who  
12 indicate they see a blue control line, the app guides the patient to obtain a photo of their test  
13 strip using their smartphone camera. During this process the app provides a guided test strip  
14 image capture, including on-screen feedback to the participant to ensure proper alignment,  
15 lighting, positioning, scale, and rotation of the test strip prior to taking a photo. Once a photo of  
16 the strip is captured, the user is presented with a high-contrast image of their test strip and  
17 asked to reinterpret the test results by indicating how many lines they now see on the strip (2<sup>nd</sup>  
18 interpretation). Presenting a high-contrast image to the patient may help them see lines on the  
19 test strip that may have previously been too faint to easily identify. Initially, the app uses the  
20 patient's direct observation of the strip to inform the patient whether it is likely their test result  
21 was positive for influenza. During the study we may adjust this process to inform the patient of  
22 their likely test result based on auto-interpretation of the images captured.  
23  
24  
25  
26

27 While the test strip differentiates between influenza A and B, we will not ask individuals to make  
28 this determination. If the guided test strip image capture is not successful, the app requests the  
29 patient to manually take a normal photo of their test strip using their smartphone for later  
30 analysis. The app uses the patient's observations to inform the patient of their likely test result.  
31  
32

33 Patients will be given links to publicly-available information on influenza from healthdirect [11]  
34 and provided with usual care recommendations in the app depending on their test results (from  
35 either the 1<sup>st</sup> or 2<sup>nd</sup> interpretation).  
36  
37

### 38 Reference testing

39 Influenza will be detected using RT-PCR on the swabs obtained by the GP at ASPREN clinical  
40 sites. Samples will be sent to SA Pathology in Adelaide, South Australia, via Australia Post's  
41 Express post system, allowing for next-day delivery from all capital cities.[12] Results of the  
42 laboratory PCR test, home self-test kit, and survey data from the app will be linked by the 8-digit  
43 number available on the test kit and PCR sample.  
44  
45

### 46 Post-test survey

47 A link to a reflective online survey created in Qualtrics© will be delivered to participants who  
48 complete the test procedure. The request to complete the survey will be delivered via  
49 participants' smartphone or tablet 24-48 hours after completing their self-test. The survey will  
50 solicit responses regarding the respondent's a) health behaviors and attitudes, b) perceptions of  
51 their experience and usability of the self-test impact, c) perceived value of self-testing, and d)  
52 intention to act on self-test results. Survey items will be close-ended and, generally, call for a  
53  
54  
55  
56  
57  
58  
59  
60

1  
2  
3 response to a five-point Likert scale with anchors ranging from strongly agree to strongly  
4 disagree (see Appendix D for follow-up survey items categorized by construct, i.e., focal topic).  
5

#### 6 Participant discontinuation

7 Individuals who start the app, provide consent, but fail to complete all steps of the test  
8 procedure will be excluded from the primary comparative accuracy analysis. If any participants  
9 who were swabbed by their GP as part of ASPREN surveillance test positive for flu, they will be  
10 contacted by their general practice clinic to discuss further clinical management; this will not be  
11 affected by failure to complete the flu@home procedure.  
12  
13

#### 14 **Data analysis**

15 We will conduct a descriptive analysis of demographics, presenting symptoms, and baseline  
16 variables such as household composition, vaccination status, and general health questions.  
17 Prevalence of influenza will be obtained from positivity rate of PCR laboratory testing.  
18 Sensitivity, specificity, positive and negative predictive values (with 95% confidence intervals)  
19 will be calculated for the presence of influenza based on patient interpretation of self-test results  
20 compared to the reference standard PCR result. Accuracy will also be calculated for  
21 participants' interpretation of the enhanced high-contrast photo of the test strip, as well as the  
22 automatic test strip interpretation algorithm, compared to the reference standard PCR result. We  
23 will also measure the accuracy of clinical prediction rules based on individual and combinations  
24 of ILI symptoms based on Flu Score [6] and other prediction rules, compared to the reference  
25 standard PCR result. Subgroup analyses will explore test accuracy based on age, symptom  
26 profile, duration of illness, and influenza type (A/B).  
27  
28  
29  
30  
31

32 We will conduct a descriptive analysis of post-test survey results related to demographics,  
33 health behaviors and attitudes, experience and usability of the self-test, impact and perceived  
34 value of self-testing, and intention to act on self-test results. In addition, we will conduct  
35 Multivariate Analysis of Variance (MANOVA) to determine if statistically significant differences  
36 exist among various subpopulations (e.g., age group, gender) regarding their responses to  
37 survey items related to variables associated with experience and usability of the self-test and  
38 and impact and perceived value of self-testing. MANOVA analysis permits simultaneous testing  
39 of the variables associated with one construct, e.g., experience and usability of the self-test,  
40 simultaneously to arrive at a holistic assessment and recognizes the potential correlation related  
41 to these variables. Analysis of Variance (ANOVA) will be used to determine if statistically  
42 significant differences exist among the responses from various subpopulations (e.g., age group,  
43 gender) to survey items related to intention to act on self-test results. We will also use Partial  
44 Least Squares Regression (PLS) to construct predictive models to assess relationships among  
45 demographics, health behaviors and attitudes, experience and usability of the self-test, impact  
46 and perceived value of self-testing, and intention to act on self-test results.  
47  
48  
49  
50

#### 51 **Sample size calculation**

52 The sample size required for this study was determined based on i) expected completion rate of  
53 the home test kit, ii) flu positivity rate, iii) availability of test kit materials, and iv) number of flu-  
54 positive test results which are typically provided in FDA submissions for regulatory approval of  
55  
56  
57  
58  
59  
60

1  
2  
3 rapid flu diagnostic tests. The expected completion rate of the home testing procedure is based  
4 on a USA-based pilot study that found that 60% of individuals completed the flu@home test kit  
5 when it was mailed to them. In the current study, we expect a higher completion rate given that  
6 participants will be recruited by their GP rather than online. The flu positivity rate among patients  
7 presenting with ILI to ASPREN clinics is based on data from previous years, which indicated a  
8 20% positivity rate among recruited adults (of all ages) in the July – December period.  
9 Assuming that 60% of the 2300 self-test kits distributed to GPs are completed (1380), we expect  
10 20% (276) to be influenza positive. This absolute number of flu positive specimens exceeds that  
11 required by FDA in regulatory submissions, which is typically 120.[13]  
12  
13  
14

### 15 **Indirect Patient and Public involvement**

16 The flu@home app has undergone several iterations of usability and user acceptance testing  
17 with a diverse population in the United States. This included usability testing conducted during a  
18 pilot phase in the USA using an independent user research firm, which provided input on app  
19 usability, time to conduct questionnaire, and the appearance and design of the app. There has  
20 not been any prior testing of the app in Australia.  
21  
22  
23

### 24 **Ethics and dissemination**

25 The study procedures will follow Australian clinical and ethical standards as outlined by the  
26 University of Adelaide Human Research Ethics Committee (HREC). All activities will follow the  
27 Code of Good Practice in Clinical Research. Participants will provide informed consent for the  
28 flu@home study within the app that is downloaded. The study was approved by the Human  
29 Research and Ethics Committee at the University of Adelaide. The authors will seek approval  
30 for any protocol modifications, which will also be reported to the clinical trials registration site.  
31 Results of this study will be reported using the STARD guidelines for reporting diagnostic  
32 accuracy studies, and published in the peer-reviewed scientific literature.[14]  
33  
34  
35

### 36 **Confidentiality and data management**

37 All study data collected are non-identifiable. No participant names, addresses, or private  
38 information are collected for the purposes of the study. Samples from the ASPREN survey and  
39 app data are linked via a unique barcode. The researchers cannot link the barcode to  
40 identifiable patient details such as name, address, or other private information. ASPREN  
41 surveillance data will be stored on University of Adelaide computers, which can only be  
42 accessed by authorized representatives. All data will be non-identifiable. All data collected by  
43 the flu@home app will be protected with industry-standard encryption on systems hosted  
44 through Amazon Web Services and the Google Cloud Platform, which are only accessible by  
45 authorized representatives of the app development organization, Audere. Audere is a non-profit  
46 application development organization that runs the flu@home application. During data analysis  
47 non-identifiable data will be transferred to a University of Washington approved data storage  
48 location, which is only accessible to authorized parties, and the University of Adelaide drives for  
49 analysis.  
50  
51  
52  
53  
54

## 55 **DISCUSSION**

56  
57  
58  
59  
60

1  
2  
3 Influenza is a common infection that occurs annually in the southern and northern hemispheres.  
4 Consultations for respiratory tract illnesses are one of the most common reasons for  
5 presentation in primary care settings in Australia and most other high- and middle-income  
6 countries.[2] Differentiating etiology of respiratory tract infection based on symptoms alone is  
7 limited, and current confirmatory diagnosis of respiratory pathogens involves laboratory  
8 testing.[13] Diagnostic tests for influenza are commonly used in laboratory settings, and in many  
9 countries are used in primary care or pharmacy settings.[15–17] Regulatory approval varies  
10 between countries, but typically tests approved for primary care involve simple point of care  
11 assays that do not require laboratory technician expertise.  
12  
13  
14

15 The potential for individuals to test themselves for influenza follows a pathway for home-based  
16 testing that has revolutionized pregnancy testing with commonly available lateral flow assays,  
17 glucose testing using home-based monitors, as well as electronic devices for measuring blood  
18 pressure. While there is strong evidence that individuals are able to obtain swabs themselves  
19 from the nose or throat [18–20], there is no evidence currently for the accuracy of individuals  
20 performing a diagnostic test on self-obtained samples for influenza.  
21  
22  
23

24 The potential value of a self-test for influenza could lead to changes in practice and behavior,  
25 assuming the test has sufficient accuracy. For individuals in the community, this could lead to  
26 faster diagnosis, improved access to diagnostic testing, improved diagnostic certainty, and  
27 reduced need to contact health care services. For primary health care services, it could reduce  
28 the burden of consultations for ILI and facilitate more rapid or targeted use of antivirals. In terms  
29 of public health, self-testing could also influence infection control and transmission reduction  
30 strategies at the community level. Combining a diagnostic test with a smartphone where the  
31 user's steps are process-controlled (e.g. embedded timers ensure the patient adheres to the  
32 test procedure) may both facilitate support for the user, and potentially allow enhanced  
33 interpretation of test results using the existing camera and software found in current devices. A  
34 downside to home/self-based testing for influenza is that easier access to testing could lead to  
35 the diagnosis of mild cases of influenza where antiviral treatment is not indicated. Increased  
36 access to self-testing include has financial implications including added costs to individuals who  
37 might have to purchase the tests, and to the healthcare system that might need to need to  
38 interpret, repeat or act on test results. Inaccurate tests could further cause harm through false  
39 negative and/or false positive results.  
40  
41  
42  
43  
44

## 45 **LIMITATIONS OF STUDY**

46 The study has several potential limitations. First, recruitment of participants will not be entirely  
47 consecutive, although this follows the procedures that the participating clinics use for ongoing  
48 surveillance activities. Limiting this study to general practices means that some patients with ILI  
49 are excluded, such as those attending hospitals and emergency departments, receiving medical  
50 care from locum doctors or not seeking any medical treatment for ILI. The spectrum of  
51 individuals presenting with ILI to GPs may be different to that expected in the community, with  
52 higher influenza prevalence, more severe symptoms, and/or longer time since onset of infection.  
53 The time point at which individuals present to their GP with influenza may have a critical impact  
54 on test sensitivity, as there is strong evidence that the sensitivity of rapid antigen influenza tests  
55  
56  
57  
58  
59  
60

1  
2  
3 declines markedly beyond the initial 48-72 hours of illness.[21,22] The performance of the nasal  
4 swab, and conduct of the lateral flow test is unsupervised, and therefore we will not be able to  
5 determine the impact of these factors on test accuracy. Conduct of the test may vary with  
6 participant characteristics, such as age or limitations in ability to handle smartphones, and their  
7 ability to visualize lines on the test strip. We will explore these using subgroup analyses (based  
8 on age), and user feedback from follow up surveys. Differences in performance of the lateral  
9 flow test as well as the interpretation of the enhanced image may depend on the technical  
10 capabilities of individuals' smartphones.  
11  
12  
13  
14

## 15 **FUNDING**

16 The Australian Sentinel Practices Research Network is supported by the Australian Government  
17 Department of Health (the Department). The opinions expressed in this paper are those of the  
18 authors, and do not necessarily represent the views of the Department.  
19

20 The flu@home study is funded by Audere and the Brotman Baty Institute at the University of  
21 Washington, and conducted in association with the University of Adelaide in Australia, and the  
22 University of Washington in the United States.  
23  
24

## 25 **ACKNOWLEDGEMENTS**

26  
27 We acknowledge the support of the Seattle Flu Study Research Team, the participating clinics  
28 in the Australia Sentinel Practices Research Network (ASPREN), and Quidel Corporation.  
29  
30  
31  
32  
33  
34  
35  
36  
37  
38  
39  
40  
41  
42  
43  
44  
45  
46  
47  
48  
49  
50  
51  
52  
53  
54  
55  
56  
57  
58  
59  
60

## APPENDIX

### Appendix A: App design and operation

The flu@home app can be used on an iPhone, iPad, Android smartphone, or Android tablet. The app is available in English for the study. However, the app supports development and release of other languages as needed. The entire app experience uses a touch-sensitive dynamic interface on the device. The app ensures the proper test procedure is followed through clear instructions and timers that prevent the participant from moving forward in the test process (e.g., when the test strip must remain in the test fluid for ten minutes to be certain the strip has enough time to process before reading the result). The app attempts to keep participants engaged during wait times by providing flu-related informational facts (during an initial one-minute timer when the nasal swab is processing in the RDT vial) and asking the participant to answer a set of demographic and illness-related survey questions (during the ten-minute timer). Field-level validation is employed to ensure participants answer specific required questions in the survey.

The app was built using React Native, a JavaScript framework used to create mobile applications for iOS and Android. The app communicates with the Google Cloud Platform (Firebase) to queue survey data and Firebase storage to queue images captured from the RDT flow. These are pulled by a NodeJS service into a PostgreSQL database hosted on an AWS Relational Database Service (RDS), which allows for operation and scale of a relational database in the cloud.

App data is stored in Amazon Web Services (AWS S3 and AWS RDS). Amazon Simple Store Service (S3) provides a straightforward web services interface that is used to store and retrieve data, such as PCR data from the swab taken as part of the ASPREN study and used for comparison to the RDT test results. Access to S3 requires user authentication. From the time data leaves the client, all data is encrypted both at rest and over communication links. We use AWS Key Management Service (KMS) to encrypt data at rest in AWS, and Google Cloud Platform automatically encrypts its data using Advanced Encryption Standard (AES). All connections to the app occur over Secure Sockets Layer (SSL), a standard security technology that establishes an encrypted link between a web server and browser, ensuring all data traversing the web server and browser remains private.

For near real-time reporting, Metabase is run in an Elastic Container Service (ECS) in the same AWS project referencing the same app data.

The app uses Firebase caching and analytics to track each participant page view, including a timestamp for each page view. Firebase is also used to track changed answers if a participant navigates back in the app flow.

## Appendix B: Australia Sentinel Practices Research Network (ASPREN) Protocol

ASPREN clinical sites will sample the first three ILI patients each week during flu season (July – October 2019 inclusive), and the first ILI patient of the week from November 2019– March 2020 inclusive. Participating clinical sites will obtain a nasal or nasopharyngeal swab which will be transported to SA Pathology, Adelaide, South Australia for testing using RT-PCR for influenza A, influenza B, as well as RSV, enterovirus, adenovirus, mycopneumoniae, human metapneumovirus, parainfluenza 1, 2, 3 and pertussis. Samples positive for influenza A will be further subtyped. All original clinical samples testing positive for influenza will be referred to the WHO-CCRRRI (Melbourne, Australia) for antigenic and phylogenetic characterization. For clinical sites in tropical regions, due to the decreased seasonality of influenza, the systematic sample involves the first three ILI patients of each week, all year round. In addition to this, in all sites all ILI patients ages 65 years and over are tested all year round.

## Appendix C: Flu@home Participant Questionnaire

### Symptom Survey

Questions marked with an \* are required.

| Symptom                       | *Which of the following were present during your illness? | *How long ago did symptoms start?<br>(Select the time frame that best applies) | *Were these symptoms present in the last 48 hours? | *How severe were your symptoms?<br>(Select the level of discomfort you felt at the worst point) |
|-------------------------------|-----------------------------------------------------------|--------------------------------------------------------------------------------|----------------------------------------------------|-------------------------------------------------------------------------------------------------|
| Fever                         | YES/NO                                                    | 1 day, 2 days, 3 days, 4+ days                                                 | YES/NO                                             | mild, moderate, severe                                                                          |
| Cough                         | YES/NO                                                    | 1 day, 2 days, 3 days, 4+ days                                                 | YES/NO                                             | mild, moderate, severe                                                                          |
| Feeling more tired than usual | YES/NO                                                    | 1 day, 2 days, 3 days, 4+ days                                                 | YES/NO                                             | mild, moderate, severe                                                                          |
| Chills or sweats              | YES/NO                                                    | 1 day, 2 days, 3 days, 4+ days                                                 | YES/NO                                             | mild, moderate, severe                                                                          |
| Sore throat                   | YES/NO                                                    | 1 day, 2 days, 3 days, 4+ days                                                 | YES/NO                                             | mild, moderate, severe                                                                          |
| Headache                      | YES/NO                                                    | 1 day, 2 days, 3 days, 4+ days                                                 | YES/NO                                             | mild, moderate, severe                                                                          |
| Muscle or body aches          | YES/NO                                                    | 1 day, 2 days, 3 days, 4+ days                                                 | YES/NO                                             | mild, moderate, severe                                                                          |
| Runny or stuffy nose          | YES/NO                                                    | 1 day, 2 days, 3 days, 4+ days                                                 | YES/NO                                             | mild, moderate, severe                                                                          |
| Shortness of breath           | YES/NO                                                    | 1 day, 2 days, 3 days, 4+ days                                                 | YES/NO                                             | mild, moderate, severe                                                                          |
| Vomiting                      | YES/NO                                                    | 1 day, 2 days, 3 days, 4+ days                                                 | YES/NO                                             | mild, moderate, severe                                                                          |

### General exposure

In the next section, the questions are going to be about being **in contact** with people who seemed to have a cold or the flu. **In contact** means being within two meters of them for at least two minutes or physical contact for any amount of time.



1  
2  
3 *For reference, two meters is about the distance between you and someone sitting two rows*  
4 *ahead of you on the bus.*  
5

6 **In the past week, have you been in contact with a person who seemed to have a cold or**  
7 **flu?**

- 8 ● Yes
- 9 ● No
- 10 ● Don't know
- 11
- 12

13 **[If YES] Were they coughing or sneezing?**

- 14 ○ Yes
- 15 ○ No
- 16 ○ Don't know
- 17
- 18

19 **In the past week, have you been in contact with any children under five years old for over**  
20 **an hour?**

- 21 ● No contact with children under 5 yrs
- 22 ● 1 child
- 23 ● 2-5 children
- 24 ● More than 5 children
- 25 ● Don't know
- 26
- 27

28 **Are there any children under 18 years old in your household?**

- 29 ● Yes
- 30 ● No
- 31 ● Don't know
- 32
- 33

34 **[If YES] Do any children in your household attend a school, childcare setting, or**  
35 **play group with at least three other children for a total of three or more hours per**  
36 **week?**

- 37 ● Yes
- 38 ● No
- 39 ● Don't know
- 40
- 41

42 **How many people live in your household (including you)?**

- 43 ● 1-2
- 44 ● 3-4
- 45 ● 5-7
- 46 ● 8+
- 47

48 **How many bedrooms are in your home?**

- 49 ● 0-1
- 50 ● 2
- 51 ● 3
- 52 ● 4
- 53 ● 5+
- 54

55 **Influenza vaccination**  
56  
57  
58  
59  
60

We would like to ask you some questions about your influenza vaccination history. This information will be used to determine how effective the vaccine is.

**Did you receive an influenza vaccination this year (2019)?**

- Yes
- No
- Do not know
- I've never received an influenza vaccination.

**[If YES] what was the approximate date of your influenza vaccination?**

- Choose month and year starting from January 2019 up to the current month

**[If YES] Did you receive a free influenza vaccination under the National Immunisation Program in 2019?**

- Yes
- No
- Do not know

[If YES] What medical condition(s) do you have that made you eligible for a free influenza vaccination?

- Free text field

[If Answer to above is something other than: "I've never received an influenza vaccination"] Did you receive an influenza vaccination last year (2018)?

- Yes
- No
- Do not know

**General health**

Next we'd like to ask you some questions about your overall health:

**Have you ever been told by a doctor that you have one of the following medical conditions? (SELECT ALL THAT APPLY)**

- Asthma
- COPD/emphysema
- Diabetes
- Heart disease
- None of these
- Do not know

**Are you a healthcare (or aged care) worker (i.e. do you directly work with patients/aged care residents in your job)?**

- Yes
- No
- Do not know

**Do you smoke tobacco?**

- Yes
- No

1  
2  
3  
4 **Does anyone in your household smoke tobacco?**

- 5 ● Yes  
6 ● No  
7

8 **Is your illness preventing you from going to work or school, going to social events, or**  
9 **exercising/working out?**

- 10 ● Yes  
11 ● No  
12

13 **\*Are you currently taking antibiotics (e.g. Amoxil, penicillin, azithromycin, co-trimoxazole**  
14 **(Bactrim), co-amoxiclav (Augmentin)) or antivirals (e.g. Tamiflu, Xofluza, Relenza)**  
15 **prescribed by a doctor (GP or hospital) for this illness?**

- 16 ● Yes  
17 ● No  
18 ● Do not know  
19

20  
21 **How old are you?**

- 22 ● 18 to 19  
23 ● 20 to 24  
24 ● 25 to 29  
25 ● 30 to 34  
26 ● 35 to 39  
27 ● 40 to 44  
28 ● 45 to 49  
29 ● 50 to 54  
30 ● 55 to 59  
31 ● 60 to 64  
32 ● 65 to 69  
33 ● 70 to 74  
34 ● 75 to 79  
35 ● 80 to 84  
36 ● 85 to 89  
37 ● 90 and older  
38  
39  
40

41 **What is the sex on your medical records?**

- 42 ● Male  
43 ● Female  
44 ● Indeterminate/Other  
45 ● Prefer not to say  
46

47 **How would you describe your race? Please select all that apply.**

- 48 ● Aboriginal  
49 ● Torres Strait Islander  
50 ● Pacific Islander  
51 ● North or East Asian  
52 ● African  
53 ● European  
54 ● White Australian  
55  
56  
57  
58  
59  
60

- South or Central American
- Middle East/North African
- Indian subcontinent
- Other

[The next question is asked after the flu rapid test is complete]

**Nice job! Do you feel you performed all of the steps in the flu test correctly? Select the most applicable option**

- It was easy to follow and I think I completed the test correctly
- It was a little confusing but I think I did the test correctly
- It was very confusing and I'm not sure I completed the test correctly
- During the test, I realized I did something incorrectly

## Appendix D: Follow-Up Survey Variables

| Category                       | Questions asked                                                                                                                                                                       |
|--------------------------------|---------------------------------------------------------------------------------------------------------------------------------------------------------------------------------------|
| Health behaviors and attitudes | I believe taking an active role in my own care is the most important factor in determining my health.*                                                                                |
|                                | I am confident that I can identify when it is necessary to get medical care versus when I can handle the problem myself.*                                                             |
|                                | I often think carefully about whether health information makes sense in my particular situation.*                                                                                     |
|                                | I acknowledge that I have a key role in the day-to-day management of my health.*                                                                                                      |
|                                | I often need someone to help me when I receive written information from my GP, nurse or pharmacist.*                                                                                  |
|                                | In general, I believe the state of my health is:**                                                                                                                                    |
|                                | I am confident that I can tell my GP concerns I have even when he/she does not ask about them.*                                                                                       |
|                                | I like to find out a lot of information about health online.*                                                                                                                         |
|                                | I am confident that I can follow through on medical treatments I need to do at home.*                                                                                                 |
|                                | I value my health more than anything else.*                                                                                                                                           |
|                                | My health needs are always met from available healthcare resources.*                                                                                                                  |
|                                | As well as seeing my GP, I regularly monitor (check for) changes in my health.*                                                                                                       |
|                                | I do what is necessary to keep myself healthy.*                                                                                                                                       |
|                                | My GP and I work together to make decisions about what's best for my health.***                                                                                                       |
| Experience/                    | The purpose of using flu@home was to:<br><div style="display: flex; justify-content: space-around; align-items: center;"> <span>_____</span> Yes <span>_____</span> No         </div> |

|                                                         |                                                                                                               |                       |                       |
|---------------------------------------------------------|---------------------------------------------------------------------------------------------------------------|-----------------------|-----------------------|
| usability                                               | Test for flu                                                                                                  | <input type="radio"/> | <input type="radio"/> |
|                                                         | Give me information about flu and medicine                                                                    | <input type="radio"/> | <input type="radio"/> |
|                                                         | Test different flu medicines                                                                                  | <input type="radio"/> | <input type="radio"/> |
|                                                         | Participate in a research study about the flu                                                                 | <input type="radio"/> | <input type="radio"/> |
|                                                         | I am satisfied with how easy it was to use flu@home (nasal swab test and app).*                               |                       |                       |
|                                                         | I had the skills needed to perform swab testing using flu@home.*                                              |                       |                       |
|                                                         | I was able to understand the results from the flu@home app.*                                                  |                       |                       |
|                                                         | The instructions for using flu@home were helpful in providing me with what I needed to perform the test.*     |                       |                       |
|                                                         | Using flu@home <b>app</b> was:****                                                                            |                       |                       |
|                                                         | Doing the flu@home <b>nasal swab test</b> was:****                                                            |                       |                       |
| Entering my information into the flu@home app was: **** |                                                                                                               |                       |                       |
|                                                         |                                                                                                               |                       |                       |
| Impact/<br>perceived<br>value                           | I would recommend flu@home to a friend or family member.*                                                     |                       |                       |
|                                                         | My GP was very supportive of me using flu@home.*                                                              |                       |                       |
|                                                         | It saves time to do a home-based test like flu@home before visiting a healthcare provider.*                   |                       |                       |
|                                                         | I feel that flu@home could help me better manage my illness.*                                                 |                       |                       |
|                                                         |                                                                                                               |                       |                       |
| Intention to<br>Act                                     | If flu@home testing indicated you had the flu, which of the following would you consider doing as next steps? |                       |                       |
|                                                         |                                                                                                               | I would consider      |                       |
|                                                         |                                                                                                               | Yes                   | No                    |
|                                                         | A virtual consultation with a provider (telemedicine visit)                                                   | <input type="radio"/> | <input type="radio"/> |
|                                                         | Sharing my results anonymously with a national flu tracking system                                            | <input type="radio"/> | <input type="radio"/> |

|  |                                                                                                                                                 |                       |                       |
|--|-------------------------------------------------------------------------------------------------------------------------------------------------|-----------------------|-----------------------|
|  | Reading flu@home tips on how to prevent flu spread<br>Encouraging others in my household to use flu@home for testing                            | <input type="radio"/> | <input type="radio"/> |
|  | I would use the flu@home kit in the future if I have symptoms.*                                                                                 |                       |                       |
|  | I would do the flu@home test if I could purchase the test kit online to send to my home, rather than see my healthcare provider for diagnosis.* |                       |                       |

\* Responses on Likert scale anchored with 'Strongly Disagree' and 'Strongly Agree'

\*\* Responses on Likert scale anchored with 'Very Poor' and 'Excellent'

\*\*\* Responses on Likert scale anchored with 'Never' and 'Always'

\*\*\*\* Responses on Likert scale anchored with 'Very Easy' and 'Very Difficult'

peer review only

## References

1. Call to Action: The Dangers of Influenza and Benefits of Vaccination in Adults with Chronic Health Conditions [Internet]. National Foundation for Infectious Diseases; 2018 Sep p. 1–19. <http://www.nfid.org/idinfo/influenza/cta-dangers-of-influenza-in-adults-with-chronic-health-c.pdf> (accessed August 2019).
2. Newall AT, Scuffham PA, Hodgkinson B. Economic Report into the Cost of Influenza to the Australian Health System; Report to the Influenza Specialist Group [Internet]. 2007 Mar p. 1–19. <http://www.isg.org.au/assets/Uploads/ISG-Cost-of-Influenza/isg-cost-influenza-report-30-2007.pdf> (accessed July 26, 2019).
3. Healthdirect Australia. Colds and flu statistics [Internet]. 2019. <https://www.healthdirect.gov.au/colds-and-flu-statistics> (accessed July 21, 2019).
4. Influenza Signs and Symptoms and the Role of Laboratory Diagnostics | CDC [Internet]. 2019. <https://www.cdc.gov/flu/professionals/diagnosis/labrolesprocedures.htm> (accessed July 29, 2019).
5. Overview of Influenza Testing Methods | CDC [Internet]. 2019. <https://www.cdc.gov/flu/professionals/diagnosis/overview-testing-methods.htm> (accessed July 29, 2019).
6. van Vugt SF, Broekhuizen BD, Zuithoff NP, et al. Validity of a clinical model to predict influenza in patients presenting with symptoms of lower respiratory tract infection in primary care. *Fam Pract*. 2015 Aug;32(4):408–14.
7. Lindstrom S PhD. Public Health Perspective on Potential Benefits and Risks of OTC Influenza Diagnostics [Internet]. Influenza Division, Centers for Disease Control and Prevention; 2016 Aug. <https://www.fda.gov/media/99888/download> (accessed July 29, 2019)
8. Aspen Mission [Internet]. ASPREN. Available from: <http://www.aspren.com.au/MissionAndVision.html> (accessed July 26, 2019).
9. Sullivan SG, Chilver MB, Carville KS, et al. Low interim influenza vaccine effectiveness, Australia, 1 May to 24 September 2017. *Euro Surveill Bull Eur Sur Mal Transm Eur Commun Dis Bull*. 2017 Oct;22(43).
10. flu@home Australia Research Study [Internet]. flu@home Australia Research Study. <http://fluathome.org.au> (accessed July 26, 2019).
11. healthdirect: Free Australian health advice you can count on [Internet]. healthdirect. 2018. <https://www.healthdirect.gov.au/> (accessed July 26, 2019).
12. Influenza vaccine effectiveness in Australia: results from the Australian Sentinel Practices Research Network | The Medical Journal of Australia [Internet].



- 1  
2  
3 [https://www.mja.com.au/journal/2014/201/2/influenza-vaccine-effectiveness-](https://www.mja.com.au/journal/2014/201/2/influenza-vaccine-effectiveness-australia-results-australian-sentinel-practices)  
4 [australia-results-australian-sentinel-practices](https://www.mja.com.au/journal/2014/201/2/influenza-vaccine-effectiveness-australia-results-australian-sentinel-practices) (accessed Jul 29, 2019).  
5  
6  
7 13. Recommendations for Clinical Laboratory Improvement Amendments of 1988  
8 (CLIA) Waiver Applications for Manufacturers of In Vitro Diagnostic Devices -  
9 Guidance for Industry and Food and Drug Administration Staff [Internet]. U.S. Food  
10 & Drug Administration. 2008. [https://www.fda.gov/regulatory-information/search-](https://www.fda.gov/regulatory-information/search-fda-guidance-documents/recommendations-clinical-laboratory-improvement-amendments-1988-clia-waiver-applications)  
11 [fda-guidance-documents/recommendations-clinical-laboratory-improvement-](https://www.fda.gov/regulatory-information/search-fda-guidance-documents/recommendations-clinical-laboratory-improvement-amendments-1988-clia-waiver-applications)  
12 [amendments-1988-clia-waiver-applications](https://www.fda.gov/regulatory-information/search-fda-guidance-documents/recommendations-clinical-laboratory-improvement-amendments-1988-clia-waiver-applications) (accessed July 29, 2019).  
13  
14 14. Cohen JF, Korevaar DA, Altman DG, Bruns DE, Gatsonis CA, Hooft L, et al.  
15 STARD 2015 guidelines for reporting diagnostic accuracy studies: explanation and  
16 elaboration. *BMJ Open*. 2016 Nov 1;6(11):e012799.  
17  
18 15. World Health Organization. WHO Interim Global Epidemiological Surveillance  
19 Standards for Influenza [Internet]. 2012.  
20 <https://www.who.int/influenza/resources/documents/INFSURVMANUAL.pdf>  
21 (accessed July 29, 2019).  
22  
23 16. Montalto NJ. An Office-Based Approach to Influenza: Clinical Diagnosis and  
24 Laboratory Testing. *Am Fam Physician*. 2003 Jan 1;67(1):111–8.  
25  
26 17. Koski RR, Klepser ME. A systematic review of rapid diagnostic tests for influenza:  
27 considerations for the community pharmacist. *J Am Pharm Assoc*. 2017 Jan  
28 1;57(1):13–9.  
29  
30 18. Murray MA, Schulz LA, Furst JW, et al. Equal performance of self-collected and  
31 health care worker-collected pharyngeal swabs for group a streptococcus testing  
32 by PCR. *J Clin Microbiol*. 2015 Feb;53(2):573–8.  
33  
34 19. Akmatov MK, Gatzemeier A, Schughart K, et al. Equivalence of Self- and Staff-  
35 Collected Nasal Swabs for the Detection of Viral Respiratory Pathogens. *PLoS*  
36 *ONE* [Internet]. 2012 Nov 14 ;7(11).  
37 <https://journals.plos.org/plosone/article?id=10.1371/journal.pone.0048508>  
38 (accessed July, 29, 2019).  
39  
40 20. Wenham C, Gray ER, Keane CE, et al. Self-Swabbing for Virological Confirmation  
41 of Influenza-Like Illness Among an Internet-Based Cohort in the UK During the  
42 2014-2015 Flu Season: Pilot Study. *J Med Internet Res*. 2018 01;20(3):e71.  
43  
44 21. Green DA, StGeorge K. Rapid Antigen Tests for Influenza: Rationale and  
45 Significance of the FDA Reclassification. Kraft CS, editor. *J Clin Microbiol*. 2018  
46 Oct 1;56(10):e00711-18.  
47  
48 22. Chartrand C, Leeflang MMG, Minion J, et al. Accuracy of Rapid Influenza  
49 Diagnostic Tests: A Meta-analysis. *Ann Intern Med*. 2012 Apr 3;156(7):500–11.  
50  
51  
52  
53  
54  
55  
56  
57  
58  
59  
60

1  
2  
3  
4  
5  
6  
7  
8  
9  
10  
11  
12  
13  
14  
15  
16  
17  
18  
19  
20  
21  
22  
23  
24  
25  
26  
27  
28  
29  
30  
31  
32  
33  
34  
35  
36  
37  
38  
39  
40  
41  
42  
43  
44  
45  
46  
47  
48  
49  
50  
51  
52  
53  
54  
55  
56  
57  
58  
59  
60

### flu@home Australia study procedure

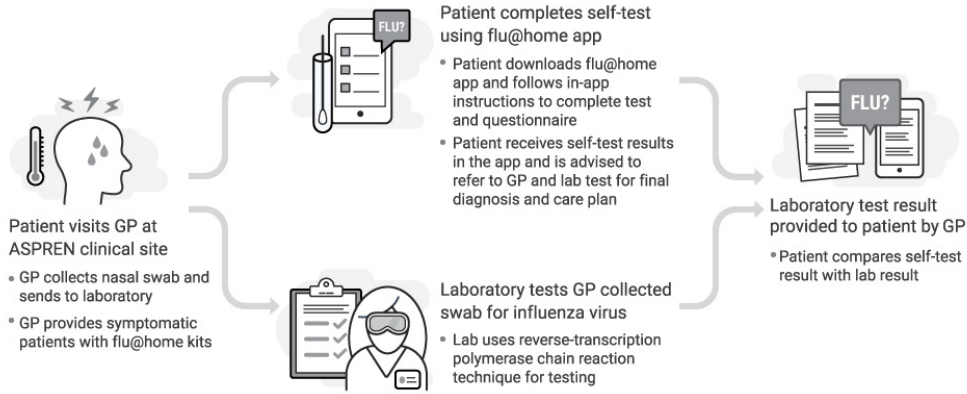

\*V1 – Test result is based on patient interpretation of test strip  
 \*V2 – Test result is based on patient interpretation of an enhanced image of the test strip  
 \*V3 – Test result is based on auto-interpretation performed within the app

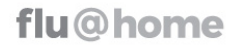

Figure 1: flu@home study procedure

243x148mm (100 x 100 DPI)

# BMJ Open

## Diagnostic accuracy of an app-guided, self-administered test for influenza among individuals presenting to general practice with influenza-like illness: Study protocol

|                                 |                                                                                                                                                                                                                                                                                                                                                                                                                                                                                                                                                                                                                                                                                                                                                                                                                                                                                                                                   |
|---------------------------------|-----------------------------------------------------------------------------------------------------------------------------------------------------------------------------------------------------------------------------------------------------------------------------------------------------------------------------------------------------------------------------------------------------------------------------------------------------------------------------------------------------------------------------------------------------------------------------------------------------------------------------------------------------------------------------------------------------------------------------------------------------------------------------------------------------------------------------------------------------------------------------------------------------------------------------------|
| Journal:                        | <i>BMJ Open</i>                                                                                                                                                                                                                                                                                                                                                                                                                                                                                                                                                                                                                                                                                                                                                                                                                                                                                                                   |
| Manuscript ID                   | bmjopen-2019-036298.R1                                                                                                                                                                                                                                                                                                                                                                                                                                                                                                                                                                                                                                                                                                                                                                                                                                                                                                            |
| Article Type:                   | Protocol                                                                                                                                                                                                                                                                                                                                                                                                                                                                                                                                                                                                                                                                                                                                                                                                                                                                                                                          |
| Date Submitted by the Author:   | 17-Jun-2020                                                                                                                                                                                                                                                                                                                                                                                                                                                                                                                                                                                                                                                                                                                                                                                                                                                                                                                       |
| Complete List of Authors:       | Lyon, Victoria; University of Washington, Family Medicine;<br>Zigman Suchsland, Monica; University of Washington,<br>Chilver, Monique; The University of Adelaide<br>Stocks, Nigel; University of Adelaide, Discipline of General Practice<br>Lutz, Barry; University of Washington, Bioengineering<br>Su, Philip<br>Cooper, Shawna<br>Park, Chunjong; University of Washington, Computer Science<br>Lavitt, Libby Rose; University of Washington, Computer Science<br>Mariakakis, Alex; University of Washington, Computer Science<br>Patel, Shwetak ; University of Washington, Computer Science<br>Graham, Chelsey; University of Washington, 6. Brotman Bay Institute for<br>Precision Medicine<br>Rieder, Mark; University of Washington, Brotman Baty Institute<br>LeRouge, Cynthia; Florida International University, College of Business<br>Thompson, Matthew; University of Washington, Department of Family<br>Medicine |
| <b>Primary Subject Heading</b>: | Infectious diseases                                                                                                                                                                                                                                                                                                                                                                                                                                                                                                                                                                                                                                                                                                                                                                                                                                                                                                               |
| Secondary Subject Heading:      | Research methods, Respiratory medicine                                                                                                                                                                                                                                                                                                                                                                                                                                                                                                                                                                                                                                                                                                                                                                                                                                                                                            |
| Keywords:                       | BIOTECHNOLOGY & BIOINFORMATICS, Molecular diagnostics <<br>INFECTIOUS DISEASES, Public health < INFECTIOUS DISEASES,<br>Infection control < INFECTIOUS DISEASES                                                                                                                                                                                                                                                                                                                                                                                                                                                                                                                                                                                                                                                                                                                                                                   |
|                                 |                                                                                                                                                                                                                                                                                                                                                                                                                                                                                                                                                                                                                                                                                                                                                                                                                                                                                                                                   |

SCHOLARONE™  
Manuscripts



I, the Submitting Author has the right to grant and does grant on behalf of all authors of the Work (as defined in the below author licence), an exclusive licence and/or a non-exclusive licence for contributions from authors who are: i) UK Crown employees; ii) where BMJ has agreed a CC-BY licence shall apply, and/or iii) in accordance with the terms applicable for US Federal Government officers or employees acting as part of their official duties; on a worldwide, perpetual, irrevocable, royalty-free basis to BMJ Publishing Group Ltd ("BMJ") its licensees and where the relevant Journal is co-owned by BMJ to the co-owners of the Journal, to publish the Work in this journal and any other BMJ products and to exploit all rights, as set out in our [licence](#).

The Submitting Author accepts and understands that any supply made under these terms is made by BMJ to the Submitting Author unless you are acting as an employee on behalf of your employer or a postgraduate student of an affiliated institution which is paying any applicable article publishing charge ("APC") for Open Access articles. Where the Submitting Author wishes to make the Work available on an Open Access basis (and intends to pay the relevant APC), the terms of reuse of such Open Access shall be governed by a Creative Commons licence – details of these licences and which [Creative Commons](#) licence will apply to this Work are set out in our licence referred to above.

Other than as permitted in any relevant BMJ Author's Self Archiving Policies, I confirm this Work has not been accepted for publication elsewhere, is not being considered for publication elsewhere and does not duplicate material already published. I confirm all authors consent to publication of this Work and authorise the granting of this licence.

# Diagnostic accuracy of an app-guided, self-administered test for influenza among individuals presenting to general practice with influenza-like illness: Study protocol

**Corresponding Author:** Victoria Lyon. Department of Family Medicine, 4225 Roosevelt Way NE, 98105, Suite 309, Box 354696. University of Washington, Seattle, USA. Email: [vlyon@uw.edu](mailto:vlyon@uw.edu) Phone: 505-660-9500

## Full Author List:

Victoria Lyon, MPH<sup>1</sup>  
Monica Zigman Suchsland, MPH, PhD student<sup>1</sup>  
Monique Chilver, B.Sc. Mol. Biol, MPH, PhD student<sup>2</sup>  
Nigel Stocks, MD, BSc, MBBS, DipPH<sup>2</sup>  
Barry R. Lutz, PhD<sup>3</sup>  
Philip Su, B.Sc. <sup>5</sup>  
Shawna Cooper, BA<sup>5</sup>  
Chunjong Park, MS, PhD student<sup>4</sup>  
Libby Rose Lavitt, BA<sup>4</sup>  
Alex Mariakakis, PhD<sup>4</sup>  
Shwetak Patel, PhD<sup>4</sup>  
Chelsey Graham, MEng<sup>6</sup>  
Mark Rieder, PhD<sup>6</sup>  
Cynthia LeRouge, PhD<sup>7</sup>  
Matthew Thompson, MBChB, MPH, DPhil<sup>1</sup>

## Affiliations:

1. Department of Family Medicine, Box 354696, University of Washington, Seattle, USA
2. Discipline of General Practice, University of Adelaide, Australia.
3. Department of Bioengineering, Box 355061, University of Washington, Seattle, USA
4. Paul G Allen School of Computer Science and Engineering, University of Washington, Seattle, USA
5. Audere, 1191 2nd Ave, Suite 450, Seattle, WA 98104, USA
6. Brotman Bay Institute for Precision Medicine, University of Washington, Seattle, USA
7. Department of Information Systems and Business Analytics, Florida International University, Miami, USA

**Word Count: 3908**

**Keywords: Influenza, self-test, accuracy, ILI, ASPREN, RDT, rapid diagnostic, mobile app, smartphone, flu**

## ABSTRACT

**Introduction:** Diagnostic tests for influenza in Australia are currently only authorized for use in clinical settings. At-home diagnostic testing for influenza could reduce the need for patient contact with health care services, which potentially could contribute to symptomatic improvement and reduced spread of influenza. We aim to determine the accuracy of an app-guided nasal self-swab combined with a lateral flow immunoassay for influenza conducted by individuals with influenza-like illness (ILI).

**Methods and analysis:** Adults ( $\geq 18$  yr) presenting with ILI will be recruited by general practitioners (GP) participating in Australian Sentinel Practices Research Network (ASPREN). Eligible participants will have a nasal swab obtained by their GP for verification of influenza A/B status using RT-PCR at an accredited laboratory. Participants will receive an influenza test kit and will download an app that collects self-reported symptoms and influenza risk factors, then instructs them in obtaining a low-nasal self-swab, running a QuickVue influenza A+B lateral flow immunoassay (Quidel Corporation), and interpreting the results. Participants will also interpret an enhanced image of the test strip in the app. The primary outcome will be the accuracy of participants' test interpretation compared to the laboratory RT-PCR reference standard. Secondary analyses will include accuracy of the enhanced test strip image, accuracy of an automatic test strip reader algorithm, and validation of prediction rules for influenza based on self-reported symptoms. A post-test survey will be used to obtain participant feedback of self-test procedures.

**Ethics and dissemination:** The study was approved by the Human Research and Ethics Committee (HREC) at the University of Adelaide (H-2019-116). Protocol details and any amendments will be reported to <https://www.tga.gov.au/>. Results will be published in the peer reviewed literature, and shared with stakeholders in the primary care and diagnostics communities.

**Universal Trial Number (UTN):** U1111-1237-0688, registered on the Australia New Zealand Clinical Trial Registry:  
<https://www.anzctr.org.au/Trial/Registration/TrialReview.aspx?ACTRN=12619001087145>

## STRENGTHS AND LIMITATIONS OF THIS STUDY

- Accuracy of nasal self-testing for influenza using the QuickVue Influenza A+B assay will be compared to reference standard of nasal or nasopharyngeal swab obtained by a GP and tested using RT-PCR.
- Recruitment will be nested within an ongoing Australian Surveillance Practices Research Network recruiting patients presenting to general practice with influenza-like illness (ILI)

- Patients attending primary care with ILI may differ in terms of disease spectrum compared to individuals with ILI at home, which is the population where the self-test is intended to be used.
- Self-swabbing of the nose and conducting a lateral flow test unsupervised and guided by an app may select individuals with greater smartphone experience, manual dexterity, and/or sociodemographic status.
- Self-report of ILI symptoms using an app may differ from symptoms obtained from GP consultations or from research staff, limiting the ability to validate clinical prediction rules for influenza.

## INTRODUCTION

Seasonal influenza occurs annually, causing disease with substantial morbidity and mortality worldwide, especially in the elderly and those with chronic disease.[1] Despite the availability of the influenza vaccine, repeated influenza infections are common throughout life, and result in a considerable healthcare burden. In Australia, it is estimated that each year influenza causes an average 310,000 general practitioner (GP) consultations, 18,000 hospital admissions, and 1,500 to 3000 deaths.[2-4] Influenza places particular burden on primary care services during the winter months, contributing to high consultation rates for acute respiratory tract infections. Detection of influenza is thought to provide value clinically by identifying patients who may be at higher risk of complications, and also to potentially inform use of antivirals and efforts to reduce transmission.[5]

GPs generally diagnose influenza based on a combination of symptoms and risk factors present in each patient, and diagnostic confirmation requires a laboratory test.[5] Multiple tests are available for influenza, including immunoassays and molecular tests with varying levels of sophistication and cost, that can be used in different clinical settings.[6] While some point-of-care tests are approved for, and suitable in primary care settings, others can only be conducted in formal laboratory facilities.

Because there is considerable overlap in symptoms caused by influenza and other respiratory pathogens, many patients who are tested for influenza receive flu-negative results. To reduce the number of unnecessary tests that are requested by GPs, clinical prediction rules have been derived to stratify individuals more accurately than individual symptoms into those with various likelihood of influenza infection.[7] Currently there are no diagnostic tests for influenza that are approved for use by individuals outside of clinical settings in Australia or the United States. The ability to accurately test individuals at home for influenza could provide several potential advantages over current practice. One advantage for patients would be convenience by reducing the need for primary care consultations. Home-testing may also facilitate the earlier use of antivirals when they are most likely to provide beneficial effects on symptom resolution and reduce transmission, and help identify individuals at higher risk of complications compared to those with other causes of influenza-like illness (ILI).[8]

1  
2  
3 The primary aim of the current study is to determine the accuracy of a self-test for influenza that  
4 involves individuals self-swabbing their nose and conducting an immunoassay lateral flow test  
5 guided by a mobile app, compared to the gold standard RT-PCR influenza test obtained by their  
6 GP. Several studies have already demonstrated the feasibility of collecting patient-reported ILI  
7 symptoms.[9-13] This study expands on this field by leveraging smartphone mobile app to  
8 instruct participants through conducting a rapid diagnostic test (RDT). We also aimed to explore  
9 additional methods for reading the test strip, and validating existing clinical prediction rules for  
10 influenza.  
11  
12  
13  
14

## 15 **METHODS**

### 16 **Study Design**

17  
18  
19 A prospective observational study of the comparative accuracy of a patient-run, mobile app-  
20 guided (see Appendix A), lateral flow test for influenza (QuickVue Influenza A + B assay test,  
21 from Quidel Corporation) using a low nasal self-swab (referred to in this protocol as  
22 'flu@home'), compared to clinician-collected nasal or nasopharyngeal swab for influenza  
23 detected by a commercial RT-PCR. The Universal Trial Number (UTN) is U1111-1237-0688,  
24 registered on 6/08/2019. (See Figure 1).  
25  
26  
27  
28

### 29 **Study population**

30 A systematic sample of adult patients with ILI presenting to general practices participating in the  
31 Australia Sentinel Practices Research Network (ASPREN), which is a network of over 350  
32 general providers from over 200 sentinel sites throughout Australia. GPs in the network  
33 participate in routine surveillance studies of respiratory infections by the Commonwealth. [14,15]  
34 (See Appendix B for ASPREN protocol).  
35  
36  
37

### 38 **Inclusion and exclusion criteria**

39 Inclusion criteria are: 1) age  $\geq$  18 years, 2) presenting to ASPREN clinic sites [16] with fever,  
40 cough, and fatigue, 3) agree to have their GP/nurse practitioner obtain a nasal or  
41 nasopharyngeal swab for surveillance purposes, and 4) have their own Android or iOS  
42 smartphone or tablet. Exclusion criteria will be non-English speakers, people who are  
43 incarcerated, people highly dependent on medical care who may be unable to give consent, and  
44 people with a cognitive impairment, an intellectual disability or mental illness. We did not  
45 exclude people with physical disabilities or impaired vision, but rather left the decision to recruit  
46 a patient up to their GP at the time of their visit.  
47  
48  
49

### 50 **Recruitment**

51 Each clinic will recruit any patient presenting with an ILI who is 18 years and older, has a  
52 smartphone and agrees to participate in the study.  
53  
54

### 55 **Clinical setting**



1  
2  
3 Study participants will be recruited from practices participating in ASPREN, which is a network  
4 of sentinel GPs who report de-identified information on ILI as well as other infectious disease  
5 conditions.[16] The de-identified information will include date of symptom onset, influenza  
6 vaccination history, comorbidities related to influenza, and whether the patient is a health care  
7 worker. Data from ASPREN are used by State and Commonwealth Departments of Health for  
8 infectious disease surveillance and vaccine effectiveness estimates.[17] ASPREN data  
9 contribute to the Global Influenza Vaccine Effectiveness Movement and the World Health  
10 Organization Collaborating Centre for Reference and Research on Influenza (WHO-CCRI).  
11  
12  
13

## 14 Outcome measurements

### 15 Primary outcome

- 16 • Accuracy of detection of influenza A/B infection based on self-reading of the flu@home  
17 test compared to laboratory RT-PCR testing.  
18

### 19 Secondary outcomes

- 20 • Accuracy of detection of influenza A/B infection based on self-reading of an enhanced  
21 high contrast image of the flu@home test strip compared to laboratory RT-PCR testing.  
22
- 23 • Accuracy of detection of influenza A/B infection based on the app's automatic  
24 interpretation algorithm of the flu@home test strip image compared to laboratory PCR  
25 testing.  
26
- 27 • Accuracy of clinical prediction rules including the Flu Score [7] based on individual and  
28 combinations of presenting symptoms obtained from the app and/or the patient's GP  
29 compared to laboratory PCR testing.  
30
- 31 • Satisfaction and experience of patients interacting with the flu@home app.  
32

### 33 Other variables

34 The app will collect information on demographics (age, sex, race), household composition,  
35 influenza vaccination history, risk factors for influenza infection, presence and duration of ILI  
36 symptoms (e.g., cough, fever, fatigue, chills or sweats), (see Appendix C). These variables will  
37 be used to facilitate interpretation of test results in terms of these various participant  
38 characteristics.  
39  
40

## 41 Study procedures

42 Patients who participate in the ASPREN study will be invited to participate in the flu@home self-  
43 testing study from July 2019 until all 2300 kits are distributed, no later than December 2020.  
44 Each participating GP will be provided with a set number of test kits, based on the numbers of  
45 ILI patients encountered in previous flu seasons, and the number of ILI patients swabbed during  
46 the current 2019 flu season. Participating GPs will be asked to recruit all patients who meet  
47 study eligibility criteria. After completing the standard ASPREN protocol (see Appendix B), a GP  
48 will ask the participant if they would like to participate in the flu@home study. Once the  
49 participant consents, the GP will hand them the test kit and instructions for downloading the free  
50 app, and the patient will be asked to conduct the remainder of the study procedures at home on  
51 that day or the following day. A post-test survey will be sent to participants via the app 24-48  
52 after they complete the test procedure.  
53  
54  
55  
56  
57  
58  
59  
60

## Influenza testing methods

### Home/self-testing

Patients will be provided with a self-test kit by their GP containing a Quidel QuickVue Influenza A+B lateral flow test (rebranded as the flu@home kit for research purposes), and asked to download the free flu@home app [18] to their personal iOS or Android smartphone or tablet. Each test kit includes a unique 8-digit study ID number that will be linked to reference test results, but cannot be used to personally identify participants. The app collects the variables noted above through a questionnaire, and guides the patient through the self-swabbing and testing procedure. They will be instructed to obtain a low nasal swab using a single foam-tipped swab inserted into each nostril, and then perform the steps to conduct the lateral flow test.

Having completed the test steps, the app guides the patient to read their test strip by first asking them whether they see a blue line (control line) and any pink lines (1<sup>st</sup> interpretation). A pink line above the blue line indicates influenza A, and a pink line below the blue control line indicates influenza B. If the patient indicates they do not see the blue control line, they are informed that they have a defective test strip and interpretation guidance is not provided. For patients who indicate they see a blue control line, the app guides the patient to obtain a photo of their test strip using their smartphone camera. During this process the app provides a guided test strip image capture, including on-screen feedback to the participant to ensure proper alignment, lighting, positioning, scale, and rotation of the test strip prior to taking a photo. Once a photo of the strip is captured, the user is presented with a high-contrast image of their test strip and asked to reinterpret the test results by indicating how many lines they now see on the strip (2<sup>nd</sup> interpretation). Presenting a high-contrast image to the patient may help them see lines on the test strip that may have previously been too faint to easily identify. Initially, the app uses the patient's direct observation of the strip to inform the patient whether it is likely their test result was positive for influenza. During the study we may adjust this process to inform the patient of their likely test result based on auto-interpretation of the images captured.

While the test strip differentiates between influenza A and B, we will not ask individuals to make this determination. If the guided test strip image capture is not successful, the app requests the patient to manually take a normal photo of their test strip using their smartphone for later analysis. The app uses the patient's observations to inform the patient of their likely test result.

Patients will be given links to publicly-available information on influenza from healthdirect [19] and provided with usual care recommendations in the app depending on their test results (from either the 1<sup>st</sup> or 2<sup>nd</sup> interpretation). The app includes a medical disclaimer indicating "The interpretation of your result may differ from a medical test conducted in a clinical lab environment. In no circumstances should the results of this test be relied upon without independent consideration and confirmation by a qualified medical practitioner." [20] Patients will be notified of the results of the reference test by their GP, who will provide standard care based on the RT-PCR results. Participants whose results are discordant with those of their GP will be asked to contact their GP for any clinical management decisions or changes that their GP would recommend.

### Reference testing

Influenza and other respiratory pathogens will be detected using RT-PCR on the swabs obtained by the GP at ASPREN clinical sites. (See Appendix B for list of pathogens tested). Samples will be sent to SA Pathology in Adelaide, South Australia, via Australia Post's Express post system, allowing for next-day delivery from all capital cities.[21] Results of the laboratory PCR test, home self-test kit, and survey data from the app will be linked by the 8-digit number available on the test kit and PCR sample.

### Post-test survey

A link to a reflective online survey created in Qualtrics© will be delivered to participants who complete the test procedure. The request to complete the survey will be delivered via participants' smartphone or tablet 24-48 hours after completing their self-test. The survey will solicit responses regarding the respondent's a) health behaviors and attitudes, b) perceptions of their experience and usability of the self-test impact, c) perceived value of self-testing, and d) intention to act on self-test results. Survey items will be close-ended and, generally, call for a response to a five-point Likert scale with anchors ranging from strongly agree to strongly disagree (see Appendix D for follow-up survey items categorized by construct, i.e., focal topic).

### Participant discontinuation

Individuals who start the app, provide consent, but fail to complete all steps of the test procedure will be excluded from the primary comparative accuracy analysis. If any participants who were swabbed by their GP as part of ASPREN surveillance test positive for flu, they will be contacted by their general practice clinic to discuss further clinical management; this will not be affected by failure to complete the flu@home procedure.

### Data analysis

We will conduct a descriptive analysis of demographics, presenting symptoms, and baseline variables such as household composition, vaccination status, and general health questions. Prevalence of influenza will be obtained from positivity rate of PCR laboratory testing. Sensitivity, specificity, positive and negative predictive values (with 95% confidence intervals) will be calculated for the presence of influenza based on patient interpretation of self-test results compared to the reference standard PCR result. Accuracy will also be calculated for participants' interpretation of the enhanced high-contrast photo of the test strip, as well as the automatic test strip interpretation algorithm, compared to the reference standard PCR result. We will also measure the accuracy of clinical prediction rules based on individual and combinations of ILI symptoms based on Flu Score [7] and other prediction rules, compared to the reference standard PCR result. Subgroup analyses will explore test accuracy based on age, symptom profile, duration of illness, and influenza type (A/B).

We will conduct a descriptive analysis of post-test survey results related to demographics, health behaviors and attitudes, experience and usability of the self-test, impact and perceived value of self-testing, and intention to act on self-test results. In addition, we will conduct Multivariate Analysis of Variance (MANOVA) to determine if statistically significant differences

1  
2  
3 exist among various subpopulations (e.g., age group, gender) regarding their responses to  
4 survey items related to variables associated with experience and usability of the self-test and  
5 impact and perceived value of self-testing. MANOVA analysis permits simultaneous testing of  
6 the variables associated with one construct, e.g., experience and usability of the self-test,  
7 simultaneously to arrive at a holistic assessment and recognizes the potential correlation related  
8 to these variables. Analysis of Variance (ANOVA) will be used to determine if statistically  
9 significant differences exist among the responses from various subpopulations (e.g., age group,  
10 gender) to survey items related to intention to act on self-test results. We will also use Partial  
11 Least Squares Regression (PLS) to construct predictive models to assess relationships among  
12 demographics, health behaviors and attitudes, experience and usability of the self-test, impact  
13 and perceived value of self-testing, and intention to act on self-test results.  
14  
15  
16  
17

### 18 **Sample size calculation**

19 The sample size required for this study was determined based on i) expected completion rate of  
20 the home test kit, ii) flu positivity rate, iii) availability of test kit materials, and iv) number of flu-  
21 positive test results which are typically provided in FDA submissions for regulatory approval of  
22 rapid flu diagnostic tests. The expected completion rate of the home testing procedure is based  
23 on a USA-based pilot study that found that 60% of individuals completed the flu@home test kit  
24 when it was mailed to them. In the current study, we expect a higher completion rate given that  
25 participants will be recruited by their GP rather than online. The flu positivity rate among patients  
26 presenting with ILI to ASPREN clinics is based on data from previous years, which indicated a  
27 20% positivity rate among recruited adults (of all ages) in the July – December period.  
28 Assuming that 60% of the 2300 self-test kits distributed to GPs are completed (1380), we expect  
29 20% (276) to be influenza positive. This absolute number of flu positive specimens exceeds that  
30 required by FDA in regulatory submissions to evaluate the accuracy of new tests designed for  
31 clinical settings, which is typically 120.[22] There are not currently any recommendations for  
32 sample sizes needed for evaluation of the accuracy of home based tests for influenza.  
33  
34  
35  
36

### 37 **Indirect Patient and Public involvement**

38 The flu@home app has undergone several iterations of usability and user acceptance testing  
39 with a diverse population in the United States. This included usability testing conducted during a  
40 pilot phase in the USA using an independent user research firm, which provided input on app  
41 usability, time to conduct questionnaire, and the appearance and design of the app. There has  
42 not been any prior testing of the app in Australia, however, the research study members from  
43 Australia reviewed the app prior to launch to ensure the language in the app was appropriate for  
44 the Australian context.  
45  
46  
47

### 48 **Ethics and dissemination**

49 The study procedures will follow Australian clinical and ethical standards as outlined by the  
50 University of Adelaide Human Research Ethics Committee (HREC). All activities will follow the  
51 Code of Good Practice in Clinical Research. Participants will provide informed consent for the  
52 flu@home study within the app that is downloaded. The study was approved by the Human  
53 Research and Ethics Committee at the University of Adelaide. The authors will seek approval  
54 for any protocol modifications, which will also be reported to the clinical trials registration site.  
55  
56  
57  
58  
59  
60

1  
2  
3 Results of this study will be reported using the STARD guidelines for reporting diagnostic  
4 accuracy studies, and published in the peer-reviewed scientific literature.[23]  
5  
6

### 7 **Confidentiality and data management**

8 All study data collected are non-identifiable. No participant names, addresses, or private  
9 information are collected for the purposes of the study. Samples from the ASPREN survey and  
10 app data are linked via a unique barcode. The researchers cannot link the barcode to  
11 identifiable patient details such as name, address, or other private information. ASPREN  
12 surveillance data will be stored on University of Adelaide computers, which can only be  
13 accessed by authorized representatives. All data will be non-identifiable. All data collected by  
14 the flu@home app will be protected with industry-standard encryption on systems hosted  
15 through Amazon Web Services and the Google Cloud Platform, which are only accessible by  
16 authorized representatives of the app development organization, Audere. Audere is a non-profit  
17 application development organization that runs the flu@home application. During data analysis  
18 non-identifiable data will be transferred to a University of Washington approved data storage  
19 location, which is only accessible to authorized parties, and the University of Adelaide drives for  
20 analysis. Further information about confidentiality and data management in the mobile app can  
21 be found in Appendix A.  
22  
23  
24  
25

## 26 **DISCUSSION**

27  
28 Influenza is a common infection that occurs annually in the southern and northern hemispheres.  
29 Consultations for respiratory tract illnesses are one of the most common reasons for  
30 presentation in primary care settings in Australia and most other high- and middle-income  
31 countries.(2) In Australia influenza season occurs between the months of May to October.[24]  
32 Differentiating etiology of respiratory tract infection based on symptoms alone is limited, and  
33 current confirmatory diagnosis of respiratory pathogens involves laboratory testing.[22]  
34 Diagnostic tests for influenza are commonly used in laboratory settings, and in many countries  
35 are used in primary care or pharmacy settings.[25–27] Regulatory approval varies between  
36 countries, but typically tests approved for primary care involve simple point of care assays that  
37 do not require laboratory technician expertise.  
38  
39  
40

41 We will use an existing rapid diagnostic test for influenza A and B that has been approved  
42 in the United States for use in primary care clinics since 2004 (QuickVue Influenza A + B assay  
43 test, from Quidel Corporation)[28]. This test has adequate performance as demonstrated by  
44 regulatory approval in the US, with a 2017-18 clinical study comparing this test to an FDA  
45 cleared A+B molecular test, showing sensitivity of 94% for Type A and 70% for Type B, and  
46 specificity of 90% for Type A and 97% for Type B[29,30]. However, we note that additional  
47 evaluations of this test (and similar lateral flow tests) for influenza show lower test accuracy in  
48 further clinical evaluations. A 2017 meta-analysis of 162 studies of rapid tests for influenza  
49 found noted that the pooled sensitivity of such tests favored industry-sponsored studies by 6.2  
50 to 34.0%. [31]  
51  
52  
53

54 The potential for individuals to test themselves for influenza follows a pathway for home-based  
55 testing that has revolutionized pregnancy testing with commonly available lateral flow assays,  
56  
57  
58  
59

1  
2  
3 glucose testing using home-based monitors, as well as electronic devices for measuring blood  
4 pressure. While there is strong evidence that individuals are able to obtain swabs themselves  
5 from the nose or throat [32–34], there is no evidence currently for the accuracy of individuals  
6 performing a diagnostic test on self-obtained samples for influenza.  
7

8  
9 The potential value of a self-test for influenza could lead to changes in practice and behavior,  
10 assuming the test has sufficient accuracy. For individuals in the community, this could lead to  
11 faster diagnosis, improved access to diagnostic testing, improved diagnostic certainty, and  
12 reduced need to contact health care services. For primary health care services, it could reduce  
13 the burden of consultations for ILI and facilitate more rapid or targeted use of antivirals if these  
14 can be prescribed remotely (by telephone, or telemedicine consultations). In terms of public  
15 health, self-testing could also influence infection control and transmission reduction strategies at  
16 the community level. Combining a diagnostic test with a smartphone where the user's steps are  
17 process-controlled (e.g. embedded timers ensure the patient adheres to the test procedure)  
18 may both facilitate support for the user, and potentially allow enhanced interpretation of test  
19 results using the existing camera and software found in current devices. A downside to  
20 home/self-based testing for influenza is that easier access to testing could lead to the diagnosis  
21 of mild cases of influenza where antiviral treatment is not indicated. Increased access to self-  
22 testing include has financial implications including added costs to individuals who might have to  
23 purchase the tests, and to the healthcare system that might need to interpret, repeat or act on  
24 test results. Inaccurate tests could further cause harm through false negative and/or false  
25 positive results.  
26  
27  
28  
29  
30

## 31 **LIMITATIONS OF STUDY**

32 The study has several potential limitations. First, recruitment of participants will not be entirely  
33 consecutive, although this follows the procedures that the participating clinics use for ongoing  
34 surveillance activities. Limiting this study to general practices means that some patients with ILI  
35 are excluded, such as those attending hospitals and emergency departments, receiving medical  
36 care from locum doctors or not seeking any medical treatment for ILI. Second, the spectrum of  
37 individuals presenting with ILI to GPs may be different to that expected in the community, with  
38 higher influenza prevalence, more severe symptoms, and/or longer time since onset of infection.  
39 The time point at which individuals present to their GP with influenza may have a critical impact  
40 on test sensitivity, as there is strong evidence that the sensitivity of rapid antigen influenza tests  
41 declines markedly beyond the initial 48-72 hours of illness.[35,36] Third, the performance of the  
42 nasal swab, and conduct of the lateral flow test is unsupervised, and therefore we will not be  
43 able to determine the impact of these factors on test accuracy. There is robust evidence that  
44 individuals are able to collect mid turbinate and low nasal swabs with similar performance to  
45 health care professionals for influenza, but we will not be able to further verify this in the current  
46 study. [37] Fourth, conduct of the test may vary with participant characteristics, such as age or  
47 limitations in ability to handle smartphones, and their ability to visualize lines on the test strip.  
48 We will explore these using subgroup analyses (based on age), and user feedback from follow  
49 up surveys. Fifth, differences in interpretation of the enhanced image may depend on the  
50 technical capabilities of individuals' smartphones. Sixth, technical aspects of the flu@home app  
51 may need additional validation before being implemented into more complex human studies or  
52  
53  
54  
55  
56  
57  
58  
59  
60

1  
2  
3 being used with a commercial device. Finally, we will not be able to evaluate comparative costs  
4 of the flu@home test compared to usual care within this study.  
5  
6  
7

## 8 **FUNDING**

9 The Australian Sentinel Practices Research Network is supported by the Australian Government  
10 Department of Health (the Department). The opinions expressed in this paper are those of the  
11 authors, and do not necessarily represent the views of the Department.  
12

13 The flu@home study is funded by Audere and Gates Ventures through the Brotman Baty  
14 Institute at the University of Washington. The study was conducted in association with the  
15 University of Adelaide in Australia, and the University of Washington in the United States.  
16 QuickVue Influenza A+B test kit supplies were donated by Quidel Corporation. Gates Ventures  
17 and Quidel Corporation were not involved in the design of the study, does not have any  
18 ownership over the management and conduct of the study, the data, or the rights to publish.  
19  
20

## 21 **ACKNOWLEDGEMENTS**

22 We acknowledge the support of the Seattle Flu Study Research Team, the participating clinics  
23 in the Australia Sentinel Practices Research Network (ASPREN), and John Tamerius from  
24 Quidel Corporation for providing the QuickVue Influenza A+B test kit supplies.  
25  
26  
27  
28  
29

## 30 **Figure Legend**

31  
32 Figure 1. flu@home Australia study procedure  
33  
34  
35  
36  
37  
38  
39  
40  
41  
42  
43  
44  
45  
46  
47  
48  
49  
50  
51  
52  
53  
54  
55  
56  
57  
58  
59  
60

## Contributorship statement

All persons who meet authorship criteria are listed as authors, and all authors certify that they have participated sufficiently in the work to take public responsibility for the content, including participation in the concept, design, analysis, writing, or revision of the manuscript. Additionally, each author certifies that this material or similar material has not been and will not be submitted to publication before its appearance in BMJ Open.

**Conception or design of the work:** Victoria Lyon, Monica Zigman Suchsland, Monique Chilver, Nigel Stocks, Barry Lutz, Shawna Cooper, Cynthia LeRouge, Matthew Thompson

**flu@home end-to-end app development and technical support:** Shawna Cooper, Philip Su,

**Image capture and interpretation feature development:** Libby Rose Lavitt, Chunjong Park, Alex Mariakakis, Shwetak Patel

**Managed ASPREN network communication and GP recruitment:** Monique Chilver, Nigel Stocks

**Managed logistics of funding, obtaining and shipping test kits:** Chelsey Graham, Mark Rieder

**Follow-up survey design:** Cynthia LeRouge, Victoria Lyon

**Drafting the article:** Victoria Lyon, Monica Zigman Suchland, Barry Lutz, Shawna Cooper, Matthew Thompson

**Critical revision of the article:** Victoria Lyon, Monica Zigman Suchland, Matthew Thompson

**Final approval of the version to be published:** Victoria Lyon, Monica Zigman Suchsland, Monique Chilver, Nigel Stocks, Barry R. Lutz, Philip Su, Shawna Cooper, Chunjong Park, Libby Rose Lavitt, Alex Mariakakis, Shwetak Patel, Chelsey Graham, Mark Rieder, Cynthia LeRouge, Matthew Thompson

Guarantors: Barry Lutz, Matthew Thompson

## Competing Interests

The authors do not have any competing interests.



## References

1. Call to Action: The Dangers of Influenza and Benefits of Vaccination in Adults with Chronic Health Conditions [Internet]. National Foundation for Infectious Diseases; 2018 Sep p. 1–19. Available from: <http://www.nfid.org/idinfo/influenza/cta-dangers-of-influenza-in-adults-with-chronic-health-c.pdf>
2. Newall AT, Scuffham PA, Hodgkinson B. Economic Report into the Cost of Influenza to the Australian Health System; Report to the Influenza Specialist Group [Internet]. 2007 Mar p. 1–19. Available from: <http://www.isg.org.au/assets/Uploads/ISG-Cost-of-Influenza/isg-cost-influenza-report-30-2007.pdf>
3. Healthdirect Australia. Colds and flu statistics [Internet]. 2019 [cited 2019 Jul 26]. Available from: <https://www.healthdirect.gov.au/colds-and-flu-statistics>
4. Influenza Fast Facts [Internet]. Influenza Specialist Group (ISG). 2020 [cited 2020 Jun 15]. Available from: <http://www.isg.org.au/index.php/clinical-information/influenza-fast-facts/>
5. Influenza Signs and Symptoms and the Role of Laboratory Diagnostics | CDC [Internet]. 2019 [cited 2019 Jul 29]. Available from: <https://www.cdc.gov/flu/professionals/diagnosis/labrolesprocedures.htm>
6. Overview of Influenza Testing Methods | CDC [Internet]. 2019 [cited 2019 Jul 26]. Available from: <https://www.cdc.gov/flu/professionals/diagnosis/overview-testing-methods.htm>
7. van Vugt SF, Broekhuizen BD, Zuithoff NP, van Essen GA, Ebell MH, Coenen S, et al. Validity of a clinical model to predict influenza in patients presenting with symptoms of lower respiratory tract infection in primary care. *Fam Pract*. 2015 Aug;32(4):408–14.
8. Lindstrom S PhD. Public Health Perspective on Potential Benefits and Risks of OTC Influenza Diagnostics [Internet]. Influenza Division, Centers for Disease Control and Prevention; 2016 Aug. Available from: <https://www.fda.gov/media/99888/download>
9. Lwin MO, Yung CF, Yap P, Jayasundar K, Sheldenkar A, Subasinghe K, et al. FluMob: Enabling Surveillance of Acute Respiratory Infections in Health-care Workers via Mobile Phones. *Front Public Health* [Internet]. 2017 Mar 17 [cited 2020 Jun 12]; Available from: [http://link.gale.com/apps/doc/A485889167/AONE?u=wash\\_main&sid=zotero&xid=f1069818](http://link.gale.com/apps/doc/A485889167/AONE?u=wash_main&sid=zotero&xid=f1069818)
10. Hsuen Y, Brownstein JS, Liu J, Hawkins JB. Use of a Digital Health Application for Influenza Surveillance in China. *Am J Public Health*. 2017 May 18;107(7):1130–6.

11. Kim M, Yune S, Chang S, Jung Y, Sa SO, Han HW. The Fever Coach Mobile App for Participatory Influenza Surveillance in Children: Usability Study. *JMIR MHealth UHealth* [Internet]. 2019 Oct 17 [cited 2020 Jun 12];7(10). Available from: <https://www.ncbi.nlm.nih.gov/pmc/articles/PMC6823603/>
12. Smolinski MS, Crawley AW, Baltrusaitis K, Chunara R, Olsen JM, Wójcik O, et al. Flu Near You: Crowdsourced Symptom Reporting Spanning 2 Influenza Seasons. *Am J Public Health*. 2015 Oct;105(10):2124–30.
13. Dalton C, Carlson S, Butler M, Cassano D, Clarke S, Fejsa J, et al. Insights From Flutracking: Thirteen Tips to Growing a Web-Based Participatory Surveillance System. *JMIR Public Health Surveill*. 2017 Aug 17;3(3):e48.
14. Parrella A, Dalton C, Pearce R, Litt J, Stocks N. ASPREN surveillance system for influenza-like illness A comparison with FluTracking and the National Notifiable Diseases Surveillance System. *Aust Fam Physician*. 2009 Nov 1;38:932–6.
15. Varghese BM, Dent E, Chilver M, Cameron S, Stocks NP. Epidemiology of viral respiratory infections in Australian working-age adults (20–64 years): 2010–2013. *Epidemiol Infect*. 2018 Apr;146(5):619–26.
16. Aspren Mission [Internet]. ASPREN. [cited 2019 Jul 26]. Available from: <http://www.aspren.com.au/MissionAndVision.html>
17. Sullivan SG, Chilver MB, Carville KS, Deng Y-M, Grant KA, Higgins G, et al. Low interim influenza vaccine effectiveness, Australia, 1 May to 24 September 2017. *Euro Surveill Bull Eur Sur Mal Transm Eur Commun Dis Bull*. 2017 Oct;22(43).
18. flu@home Australia Research Study [Internet]. flu@home Australia Research Study. [cited 2019 Jul 26]. Available from: <http://fluathome.org.au>
19. healthdirect: Free Australian health advice you can count on [Internet]. healthdirect. 2018 [cited 2019 Aug 21]. Available from: <https://www.healthdirect.gov.au/>
20. flu@home Mobile App. Audere; 2020.
21. Influenza vaccine effectiveness in Australia: results from the Australian Sentinel Practices Research Network | The Medical Journal of Australia [Internet]. [cited 2019 Jul 29]. Available from: <https://www.mja.com.au/journal/2014/201/2/influenza-vaccine-effectiveness-australia-results-australian-sentinel-practices>
22. Recommendations for Clinical Laboratory Improvement Amendments of 1988 (CLIA) Waiver Applications for Manufacturers of In Vitro Diagnostic Devices - Guidance for Industry and Food and Drug Administration Staff [Internet]. U.S. Food & Drug Administration. 2008 [cited 2019 Jul 29]. Available from: <https://www.fda.gov/regulatory-information/search-fda-guidance-documents/recommendations-clinical-laboratory-improvement-amendments-1988-clia-waiver-applications>

23. Cohen JF, Korevaar DA, Altman DG, Bruns DE, Gatsonis CA, Hooft L, et al. STARD 2015 guidelines for reporting diagnostic accuracy studies: explanation and elaboration. *BMJ Open*. 2016 Nov 1;6(11):e012799.
24. Tay EL, Grant K, Kirk M, Mounts A, Kelly H. Exploring a Proposed WHO Method to Determine Thresholds for Seasonal Influenza Surveillance. *PLOS ONE*. 2013 Oct 11;8(10):e77244.
25. World Health Organization. WHO Interim Global Epidemiological Surveillance Standards for Influenza [Internet]. 2012 [cited 2019 Jul 29]. Available from: <https://www.who.int/influenza/resources/documents/INFSURVMANUAL.pdf>
26. Montalto NJ. An Office-Based Approach to Influenza: Clinical Diagnosis and Laboratory Testing. *Am Fam Physician*. 2003 Jan 1;67(1):111–8.
27. Koski RR, Klepser ME. A systematic review of rapid diagnostic tests for influenza: considerations for the community pharmacist. *J Am Pharm Assoc*. 2017 Jan 1;57(1):13–9.
28. FDA Grants CLIA-Waived Status to Quidel's QuickVue Influenza A+B Test [Internet]. Businesswire. 2004 [cited 2020 May 27]. Available from: <https://www.businesswire.com/news/home/20040225005146/en/FDA-Grants-CLIA-Waived-Status-Quidels-QuickVue-Influenza>
29. QuickVue Influenza A+B Test - CLIA Complexity: WAIVED [package insert] [Internet]. Quidel Corporation; [cited 2020 May 27]. Available from: <https://www.quidel.com/immunoassays/rapid-influenza-tests/quickvue-influenza-test>
30. Influenza A+B Test - Frequently Asked Questions [Internet]. Quidel Corporation; 2018 [cited 2020 May 27]. Available from: <https://www.quidel.com/immunoassays/rapid-influenza-tests/quickvue-influenza-test>
31. Merckx J, Wali R, Schiller I, Caya C, Gore GC, Chartrand C, et al. Diagnostic Accuracy of Novel and Traditional Rapid Tests for Influenza Infection Compared With Reverse Transcriptase Polymerase Chain Reaction: A Systematic Review and Meta-analysis. *Ann Intern Med*. 2017 Sep 19;167(6):394–409.
32. Murray MA, Schulz LA, Furst JW, Homme JH, Jenkins SM, Uhl JR, et al. Equal performance of self-collected and health care worker-collected pharyngeal swabs for group a streptococcus testing by PCR. *J Clin Microbiol*. 2015 Feb;53(2):573–8.
33. Akmatov MK, Gatzemeier A, Schughart K, Pessler F. Equivalence of Self- and Staff-Collected Nasal Swabs for the Detection of Viral Respiratory Pathogens. *PLoS ONE* [Internet]. 2012 Nov 14 [cited 2019 Jul 29];7(11). Available from: <https://journals.plos.org/plosone/article?id=10.1371/journal.pone.0048508>

- 1  
2  
3 34. Wenham C, Gray ER, Keane CE, Donati M, Paolotti D, Pebody R, et al. Self-  
4 Swabbing for Virological Confirmation of Influenza-Like Illness Among an Internet-  
5 Based Cohort in the UK During the 2014-2015 Flu Season: Pilot Study. *J Med*  
6 *Internet Res.* 2018 01;20(3):e71.  
7  
8  
9 35. Green DA, StGeorge K. Rapid Antigen Tests for Influenza: Rationale and  
10 Significance of the FDA Reclassification. Kraft CS, editor. *J Clin Microbiol.* 2018  
11 Oct 1;56(10):e00711-18.  
12  
13 36. Chartrand C, Leeflang MMG, Minion J, Brewer T, Pai M. Accuracy of Rapid  
14 Influenza Diagnostic Tests: A Meta-analysis. *Ann Intern Med.* 2012 Apr  
15 3;156(7):500–11.  
16  
17 37. Seaman CP, Tran LTT, Cowling BJ, Sullivan SG. Self-collected compared with  
18 professional-collected swabbing in the diagnosis of influenza in symptomatic  
19 individuals: A meta-analysis and assessment of validity. *J Clin Virol Off Publ Pan*  
20 *Am Soc Clin Virol.* 2019;118:28–35.  
21  
22  
23  
24  
25  
26  
27  
28  
29  
30  
31  
32  
33  
34  
35  
36  
37  
38  
39  
40  
41  
42  
43  
44  
45  
46  
47  
48  
49  
50  
51  
52  
53  
54  
55  
56  
57  
58  
59  
60

## flu@home Australia study procedure

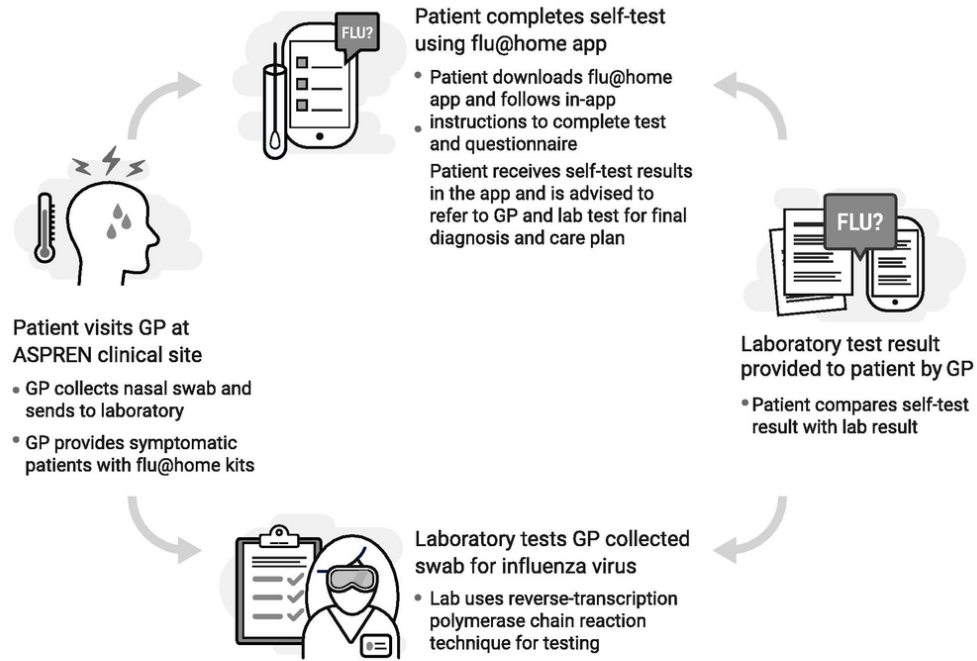

\*V1 – Test result is based on patient interpretation of test strip  
 \*V2 – Test result is based on patient interpretation of an enhanced image of the test strip  
 \*V3 – Test result is based on auto-interpretation performed within the app

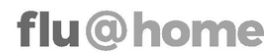

flu@home Australia study procedure

85x81mm (300 x 300 DPI)

## APPENDIX

### Appendix A: App design and operation

The flu@home app can be used on an iPhone, iPad, Android smartphone, or Android tablet. The app is available in English for the study. However, the app supports development and release of other languages as needed. The entire app experience uses a touch-sensitive dynamic interface on the device. The app ensures the proper test procedure is followed through clear instructions and timers that prevent the participant from moving forward in the test process (e.g., when the test strip must remain in the test fluid for ten minutes to be certain the strip has enough time to process before reading the result). The app attempts to keep participants engaged during wait times by providing flu-related informational facts (during an initial one-minute timer when the nasal swab is processing in the RDT vial) and asking the participant to answer a set of demographic and illness-related survey questions (during the ten-minute timer). Field-level validation is employed to ensure participants answer specific required questions in the survey.

The app was built using React Native, a JavaScript framework used to create mobile applications for iOS and Android. The app communicates with the Google Cloud Platform (Firebase) to queue survey data and Firebase storage to queue images captured from the RDT flow. These are pulled by a NodeJS service into a PostgreSQL database hosted on an AWS Relational Database Service (RDS), which allows for operation and scale of a relational database in the cloud.

The flu@home Australia app is available for personal devices which are expected to be under control of an individual who uses a passcode to access the device. All supported devices use encryption to protect app data resident on the device. This encryption is afforded by the device itself, not a specific application. In the event that a device is stolen, the device's onboard locking feature is the front-line defense against access to data on the device. The flu@home application does not collect the user's name, email, or other key identifiable information in the app. It focuses on data collection of symptoms, disease presentation, and demographics. The level of data protection offered by the flu@home app is the same level of protection afforded to most other health applications, email, messaging, etc. available on a mobile device.

App data is stored in Amazon Web Services (AWS S3 and AWS RDS). Amazon Simple Store Service (S3) provides a straightforward web services interface that is used to store and retrieve data, such as PCR data from the swab taken as part of the ASPREN study and used for comparison to the RDT test results. Access to S3 requires user authentication. From the time data leaves the client, all data is encrypted both at rest and over communication links. We use AWS Key Management Service (KMS) to encrypt data at rest in AWS, and Google Cloud Platform automatically encrypts its data using Advanced Encryption Standard (AES). All connections to the app occur over Secure Sockets Layer (SSL), a standard security technology that establishes an encrypted link between a web server and browser, ensuring all data traversing the web server and browser remains private.

1  
2  
3  
4  
5  
6 For near real-time reporting, Metabase is run in an Elastic Container Service (ECS) in the same  
7 AWS project referencing the same app data.  
8

9 The app uses Firebase caching and analytics to track each participant page view, including a  
10 timestamp for each page view. Firebase is also used to track changed answers if a participant  
11 navigates back in the app flow.  
12  
13  
14  
15  
16  
17  
18  
19  
20  
21  
22  
23  
24  
25  
26  
27  
28  
29  
30  
31  
32  
33  
34  
35  
36  
37  
38  
39  
40  
41  
42  
43  
44  
45  
46  
47  
48  
49  
50  
51  
52  
53  
54  
55  
56  
57  
58  
59  
60

## Appendix B: Australia Sentinel Practices Research Network (ASPREN) Protocol

The protocol for ASPREN clinical sites requires GPs to sample the first three ILI patients each week during flu season (May – October 2019 inclusive), and the first ILI patient of the week from November 2019– April 2020 inclusive. For the flu@home study, GPs will be allowed to recruit all adult patients presenting to the clinic with ILI symptoms, in order to meet recruitment goals. Participating clinical sites will obtain a nasal or nasopharyngeal swab which will be transported to SA Pathology, Adelaide, South Australia for testing using RT-PCR for influenza A, influenza B, as well as RSV, enterovirus, adenovirus, mycopneumoniae, human metapneumovirus, parainfluenza 1, 2, 3 and pertussis. Samples positive for influenza A will be further subtyped. All original clinical samples testing positive for influenza will be referred to the WHO-CCRR (Melbourne, Australia) for antigenic and phylogenetic characterization. For clinical sites in tropical regions, due to the decreased seasonality of influenza, the systematic sample involves the first three ILI patients of each week, all year round. In addition to this, in all sites all ILI patients ages 65 years and over are tested all year round.



## Appendix C: Flu@home Participant Questionnaire

### Symptom Survey

Questions marked with an \* are required.

| Symptom                       | *Which of the following were present during your illness? | *How long ago did symptoms start?<br>(Select the time frame that best applies) | *Were these symptoms present in the last 48 hours? | *How severe were your symptoms?<br>(Select the level of discomfort you felt at the worst point) |
|-------------------------------|-----------------------------------------------------------|--------------------------------------------------------------------------------|----------------------------------------------------|-------------------------------------------------------------------------------------------------|
| Fever                         | YES/NO                                                    | 1 day, 2 days, 3 days, 4+ days                                                 | YES/NO                                             | mild, moderate, severe                                                                          |
| Cough                         | YES/NO                                                    | 1 day, 2 days, 3 days, 4+ days                                                 | YES/NO                                             | mild, moderate, severe                                                                          |
| Feeling more tired than usual | YES/NO                                                    | 1 day, 2 days, 3 days, 4+ days                                                 | YES/NO                                             | mild, moderate, severe                                                                          |
| Chills or sweats              | YES/NO                                                    | 1 day, 2 days, 3 days, 4+ days                                                 | YES/NO                                             | mild, moderate, severe                                                                          |
| Sore throat                   | YES/NO                                                    | 1 day, 2 days, 3 days, 4+ days                                                 | YES/NO                                             | mild, moderate, severe                                                                          |
| Headache                      | YES/NO                                                    | 1 day, 2 days, 3 days, 4+ days                                                 | YES/NO                                             | mild, moderate, severe                                                                          |
| Muscle or body aches          | YES/NO                                                    | 1 day, 2 days, 3 days, 4+ days                                                 | YES/NO                                             | mild, moderate, severe                                                                          |
| Runny or stuffy nose          | YES/NO                                                    | 1 day, 2 days, 3 days, 4+ days                                                 | YES/NO                                             | mild, moderate, severe                                                                          |
| Shortness of breath           | YES/NO                                                    | 1 day, 2 days, 3 days, 4+ days                                                 | YES/NO                                             | mild, moderate, severe                                                                          |
| Vomiting                      | YES/NO                                                    | 1 day, 2 days, 3 days, 4+ days                                                 | YES/NO                                             | mild, moderate, severe                                                                          |

### General exposure

In the next section, the questions are going to be about being **in contact** with people who seemed to have a cold or the flu. **In contact** means being within two meters of them for at least two minutes or physical contact for any amount of time.

1  
2  
3 *For reference, two meters is about the distance between you and someone sitting two rows*  
4 *ahead of you on the bus.*  
5

6 **In the past week, have you been in contact with a person who seemed to have a cold or**  
7 **flu?**

- 8 ● Yes
- 9 ● No
- 10 ● Don't know
- 11
- 12

13 **[If YES] Were they coughing or sneezing?**

- 14 ○ Yes
- 15 ○ No
- 16 ○ Don't know
- 17
- 18

19 **In the past week, have you been in contact with any children under five years old for over**  
20 **an hour?**

- 21 ● No contact with children under 5 yrs
- 22 ● 1 child
- 23 ● 2-5 children
- 24 ● More than 5 children
- 25 ● Don't know
- 26
- 27

28 **Are there any children under 18 years old in your household?**

- 29 ● Yes
- 30 ● No
- 31 ● Don't know
- 32
- 33

34 **[If YES] Do any children in your household attend a school, childcare setting, or**  
35 **play group with at least three other children for a total of three or more hours per**  
36 **week?**

- 37 ● Yes
- 38 ● No
- 39 ● Don't know
- 40
- 41

42 **How many people live in your household (including you)?**

- 43 ● 1-2
- 44 ● 3-4
- 45 ● 5-7
- 46 ● 8+
- 47

48 **How many bedrooms are in your home?**

- 49 ● 0-1
- 50 ● 2
- 51 ● 3
- 52 ● 4
- 53 ● 5+
- 54

55 **Influenza vaccination**  
56  
57  
58  
59  
60

We would like to ask you some questions about your influenza vaccination history. This information will be used to determine how effective the vaccine is.

**Did you receive an influenza vaccination this year (2019\*)?**

- Yes
- No
- Do not know
- I've never received an influenza vaccination.

**[If YES] what was the approximate date of your influenza vaccination?**

- Choose month and year starting from January 2019\* up to the current month

**[If YES] Did you receive a free influenza vaccination under the National Immunisation Program in 2019\*?**

- Yes
- No
- Do not know

[If YES] What medical condition(s) do you have that made you eligible for a free influenza vaccination?

- Free text field

[If Answer to above is something other than: "I've never received an influenza vaccination"] Did you receive an influenza vaccination last year (2018\*)?

- Yes
- No
- Do not know

**General health**

Next we'd like to ask you some questions about your overall health:

**Have you ever been told by a doctor that you have one of the following medical conditions? (SELECT ALL THAT APPLY)**

- Asthma
- COPD/emphysema
- Diabetes
- Heart disease
- None of these
- Do not know

**Are you a healthcare (or aged care) worker (i.e. do you directly work with patients/aged care residents in your job)?**

- Yes
- No
- Do not know

**Do you smoke tobacco?**

- Yes
- No

1  
2  
3  
4 **Does anyone in your household smoke tobacco?**

- 5 ● Yes  
6 ● No  
7

8 **Is your illness preventing you from going to work or school, going to social events, or**  
9 **exercising/working out?**

- 10 ● Yes  
11 ● No  
12

13  
14 **Are you currently taking antibiotics (e.g. Amoxil, penicillin, azithromycin, co-trimoxazole**  
15 **(Bactrim), co-amoxiclav (Augmentin)) or antivirals (e.g. Tamiflu, Xofluza, Relenza)**  
16 **prescribed by a doctor (GP or hospital) for this illness?**

- 17 ● Yes  
18 ● No  
19 ● Do not know  
20

21 **How old are you?**

- 22 ● 18 to 19  
23 ● 20 to 24  
24 ● 25 to 29  
25 ● 30 to 34  
26 ● 35 to 39  
27 ● 40 to 44  
28 ● 45 to 49  
29 ● 50 to 54  
30 ● 55 to 59  
31 ● 60 to 64  
32 ● 65 to 69  
33 ● 70 to 74  
34 ● 75 to 79  
35 ● 80 to 84  
36 ● 85 to 89  
37 ● 90 and older  
38  
39  
40

41 **What is the sex on your medical records?**

- 42 ● Male  
43 ● Female  
44 ● Indeterminate/Other  
45 ● Prefer not to say  
46

47 **How would you describe your race?** Please select all that apply.

- 48 ● Aboriginal  
49 ● Torres Strait Islander  
50 ● Pacific Islander  
51 ● North or East Asian  
52 ● African  
53 ● European  
54 ● White Australian  
55  
56  
57  
58  
59  
60

- South or Central American
- Middle East/North African
- Indian subcontinent
- Other

[The next question is asked after the flu rapid test is complete]

**Nice job! Do you feel you performed all of the steps in the flu test correctly? Select the most applicable option**

- It was easy to follow and I think I completed the test correctly
- It was a little confusing but I think I did the test correctly
- It was very confusing and I'm not sure I completed the test correctly
- During the test, I realized I did something incorrectly

*\* All questions with an asterisk listed by the year will be updated in the mobile app in January 2020 (i.e. questions referring to "this year" will list 2020 instead of 2019.)*

## Appendix D: Follow-Up Survey Variables

| Category                       | Questions asked                                                                                                           |
|--------------------------------|---------------------------------------------------------------------------------------------------------------------------|
| Health behaviors and attitudes | I believe taking an active role in my own care is the most important factor in determining my health.*                    |
|                                | I am confident that I can identify when it is necessary to get medical care versus when I can handle the problem myself.* |
|                                | I often think carefully about whether health information makes sense in my particular situation.*                         |
|                                | I acknowledge that I have a key role in the day-to-day management of my health.*                                          |
|                                | I often need someone to help me when I receive written information from my GP, nurse or pharmacist.*                      |
|                                | In general, I believe the state of my health is:**                                                                        |
|                                | I am confident that I can tell my GP concerns I have even when he/she does not ask about them.*                           |
|                                | I like to find out a lot of information about health online.*                                                             |
|                                | I am confident that I can follow through on medical treatments I need to do at home.*                                     |
|                                | I value my health more than anything else.*                                                                               |
|                                | My health needs are always met from available healthcare resources.*                                                      |
|                                | As well as seeing my GP, I regularly monitor (check for) changes in my health.*                                           |
|                                | Experience/                                                                                                               |

|                                                         |                                                                                                               |                       |                       |
|---------------------------------------------------------|---------------------------------------------------------------------------------------------------------------|-----------------------|-----------------------|
| usability                                               | Test for flu                                                                                                  | <input type="radio"/> | <input type="radio"/> |
|                                                         | Give me information about flu and medicine                                                                    | <input type="radio"/> | <input type="radio"/> |
|                                                         | Test different flu medicines                                                                                  | <input type="radio"/> | <input type="radio"/> |
|                                                         | Participate in a research study about the flu                                                                 | <input type="radio"/> | <input type="radio"/> |
|                                                         | I am satisfied with how easy it was to use flu@home (nasal swab test and app).*                               |                       |                       |
|                                                         | I had the skills needed to perform swab testing using flu@home.*                                              |                       |                       |
|                                                         | I was able to understand the results from the flu@home app.*                                                  |                       |                       |
|                                                         | The instructions for using flu@home were helpful in providing me with what I needed to perform the test.*     |                       |                       |
|                                                         | Using flu@home <b>app</b> was:****                                                                            |                       |                       |
|                                                         | Doing the flu@home <b>nasal swab test</b> was:****                                                            |                       |                       |
| Entering my information into the flu@home app was: **** |                                                                                                               |                       |                       |
| Impact/<br>perceived<br>value                           | I would recommend flu@home to a friend or family member.*                                                     |                       |                       |
|                                                         | My GP was very supportive of me using flu@home.*                                                              |                       |                       |
|                                                         | It saves time to do a home-based test like flu@home before visiting a healthcare provider.*                   |                       |                       |
|                                                         | I feel that flu@home could help me better manage my illness.*                                                 |                       |                       |
| Intention to<br>Act                                     | If flu@home testing indicated you had the flu, which of the following would you consider doing as next steps? |                       |                       |
|                                                         |                                                                                                               | I would consider      |                       |
|                                                         |                                                                                                               | Yes                   | No                    |
|                                                         | A virtual consultation with a provider (telemedicine visit)                                                   | <input type="radio"/> | <input type="radio"/> |
|                                                         | Sharing my results anonymously with a national flu tracking system                                            | <input type="radio"/> | <input type="radio"/> |

|  |                                                                                                                                                 |                                                                                            |
|--|-------------------------------------------------------------------------------------------------------------------------------------------------|--------------------------------------------------------------------------------------------|
|  | Reading flu@home tips on how to prevent flu spread<br>Encouraging others in my household to use flu@home for testing                            | <input type="radio"/> <input type="radio"/><br><input type="radio"/> <input type="radio"/> |
|  | I would use the flu@home kit in the future if I have symptoms.*                                                                                 |                                                                                            |
|  | I would do the flu@home test if I could purchase the test kit online to send to my home, rather than see my healthcare provider for diagnosis.* |                                                                                            |

\* Responses on Likert scale anchored with 'Strongly Disagree' and 'Strongly Agree'

\*\* Responses on Likert scale anchored with 'Very Poor' and 'Excellent'

\*\*\* Responses on Likert scale anchored with 'Never' and 'Always'

\*\*\*\* Responses on Likert scale anchored with 'Very Easy' and 'Very Difficult'



# BMJ Open

## Diagnostic accuracy of an app-guided, self-administered test for influenza among individuals presenting to general practice with influenza-like illness: Study protocol

|                                 |                                                                                                                                                                                                                                                                                                                                                                                                                                                                                                                                                                                                                                                                                                                                                                                                                                                                                                                                   |
|---------------------------------|-----------------------------------------------------------------------------------------------------------------------------------------------------------------------------------------------------------------------------------------------------------------------------------------------------------------------------------------------------------------------------------------------------------------------------------------------------------------------------------------------------------------------------------------------------------------------------------------------------------------------------------------------------------------------------------------------------------------------------------------------------------------------------------------------------------------------------------------------------------------------------------------------------------------------------------|
| Journal:                        | <i>BMJ Open</i>                                                                                                                                                                                                                                                                                                                                                                                                                                                                                                                                                                                                                                                                                                                                                                                                                                                                                                                   |
| Manuscript ID                   | bmjopen-2019-036298.R2                                                                                                                                                                                                                                                                                                                                                                                                                                                                                                                                                                                                                                                                                                                                                                                                                                                                                                            |
| Article Type:                   | Protocol                                                                                                                                                                                                                                                                                                                                                                                                                                                                                                                                                                                                                                                                                                                                                                                                                                                                                                                          |
| Date Submitted by the Author:   | 02-Sep-2020                                                                                                                                                                                                                                                                                                                                                                                                                                                                                                                                                                                                                                                                                                                                                                                                                                                                                                                       |
| Complete List of Authors:       | Lyon, Victoria; University of Washington, Family Medicine;<br>Zigman Suchsland, Monica; University of Washington,<br>Chilver, Monique; The University of Adelaide<br>Stocks, Nigel; University of Adelaide, Discipline of General Practice<br>Lutz, Barry; University of Washington, Bioengineering<br>Su, Philip<br>Cooper, Shawna<br>Park, Chunjong; University of Washington, Computer Science<br>Lavitt, Libby Rose; University of Washington, Computer Science<br>Mariakakis, Alex; University of Washington, Computer Science<br>Patel, Shwetak ; University of Washington, Computer Science<br>Graham, Chelsey; University of Washington, 6. Brotman Bay Institute for<br>Precision Medicine<br>Rieder, Mark; University of Washington, Brotman Baty Institute<br>LeRouge, Cynthia; Florida International University, College of Business<br>Thompson, Matthew; University of Washington, Department of Family<br>Medicine |
| <b>Primary Subject Heading</b>: | Infectious diseases                                                                                                                                                                                                                                                                                                                                                                                                                                                                                                                                                                                                                                                                                                                                                                                                                                                                                                               |
| Secondary Subject Heading:      | Research methods, Respiratory medicine                                                                                                                                                                                                                                                                                                                                                                                                                                                                                                                                                                                                                                                                                                                                                                                                                                                                                            |
| Keywords:                       | BIOTECHNOLOGY & BIOINFORMATICS, Molecular diagnostics <<br>INFECTIOUS DISEASES, Public health < INFECTIOUS DISEASES,<br>Infection control < INFECTIOUS DISEASES                                                                                                                                                                                                                                                                                                                                                                                                                                                                                                                                                                                                                                                                                                                                                                   |
|                                 |                                                                                                                                                                                                                                                                                                                                                                                                                                                                                                                                                                                                                                                                                                                                                                                                                                                                                                                                   |

SCHOLARONE™  
Manuscripts



I, the Submitting Author has the right to grant and does grant on behalf of all authors of the Work (as defined in the below author licence), an exclusive licence and/or a non-exclusive licence for contributions from authors who are: i) UK Crown employees; ii) where BMJ has agreed a CC-BY licence shall apply, and/or iii) in accordance with the terms applicable for US Federal Government officers or employees acting as part of their official duties; on a worldwide, perpetual, irrevocable, royalty-free basis to BMJ Publishing Group Ltd ("BMJ") its licensees and where the relevant Journal is co-owned by BMJ to the co-owners of the Journal, to publish the Work in this journal and any other BMJ products and to exploit all rights, as set out in our [licence](#).

The Submitting Author accepts and understands that any supply made under these terms is made by BMJ to the Submitting Author unless you are acting as an employee on behalf of your employer or a postgraduate student of an affiliated institution which is paying any applicable article publishing charge ("APC") for Open Access articles. Where the Submitting Author wishes to make the Work available on an Open Access basis (and intends to pay the relevant APC), the terms of reuse of such Open Access shall be governed by a Creative Commons licence – details of these licences and which [Creative Commons](#) licence will apply to this Work are set out in our licence referred to above.

Other than as permitted in any relevant BMJ Author's Self Archiving Policies, I confirm this Work has not been accepted for publication elsewhere, is not being considered for publication elsewhere and does not duplicate material already published. I confirm all authors consent to publication of this Work and authorise the granting of this licence.

# Diagnostic accuracy of an app-guided, self-administered test for influenza among individuals presenting to general practice with influenza-like illness: Study protocol

**Corresponding Author:** Victoria Lyon. Department of Family Medicine, 4225 Roosevelt Way NE, 98105, Suite 309, Box 354696. University of Washington, Seattle, USA. Email: [vlyon@uw.edu](mailto:vlyon@uw.edu) Phone: 505-660-9500

## Full Author List:

Victoria Lyon, MPH<sup>1</sup>  
Monica Zigman Suchsland, MPH, PhD student<sup>1</sup>  
Monique Chilver, B.Sc. Mol. Biol, MPH, PhD student<sup>2</sup>  
Nigel Stocks, MD, BSc, MBBS, DipPH<sup>2</sup>  
Barry R. Lutz, PhD<sup>3</sup>  
Philip Su, B.Sc. <sup>5</sup>  
Shawna Cooper, BA<sup>5</sup>  
Chunjong Park, MS, PhD student<sup>4</sup>  
Libby Rose Lavitt, BA<sup>4</sup>  
Alex Mariakakis, PhD<sup>4</sup>  
Shwetak Patel, PhD<sup>4</sup>  
Chelsey Graham, MEng<sup>6</sup>  
Mark Rieder, PhD<sup>6</sup>  
Cynthia LeRouge, PhD<sup>7</sup>  
Matthew Thompson, MBChB, MPH, DPhil<sup>1</sup>

## Affiliations:

1. Department of Family Medicine, Box 354696, University of Washington, Seattle, USA
2. Discipline of General Practice, University of Adelaide, Australia.
3. Department of Bioengineering, Box 355061, University of Washington, Seattle, USA
4. Paul G Allen School of Computer Science and Engineering, University of Washington, Seattle, USA
5. Audere, 1191 2nd Ave, Suite 450, Seattle, WA 98104, USA
6. Brotman Bay Institute for Precision Medicine, University of Washington, Seattle, USA
7. Department of Information Systems and Business Analytics, Florida International University, Miami, USA

**Word Count: 4176**

**Keywords: Influenza, self-test, accuracy, ILI, ASPREN, RDT, rapid diagnostic, mobile app, smartphone, flu**

## ABSTRACT

**Introduction:** Diagnostic tests for influenza in Australia are currently only authorized for use in clinical settings. At-home diagnostic testing for influenza could reduce the need for patient contact with health care services, which potentially could contribute to symptomatic improvement and reduced spread of influenza. We aim to determine the accuracy of an app-guided nasal self-swab combined with a lateral flow immunoassay for influenza conducted by individuals with influenza-like illness (ILI).

**Methods and analysis:** Adults ( $\geq 18$  yr) presenting with ILI will be recruited by general practitioners (GP) participating in Australian Sentinel Practices Research Network (ASPREN). Eligible participants will have a nasal swab obtained by their GP for verification of influenza A/B status using RT-PCR at an accredited laboratory. Participants will receive an influenza test kit and will download an app that collects self-reported symptoms and influenza risk factors, then instructs them in obtaining a low-nasal self-swab, running a QuickVue influenza A+B lateral flow immunoassay (Quidel Corporation), and interpreting the results. Participants will also interpret an enhanced image of the test strip in the app. The primary outcome will be the accuracy of participants' test interpretation compared to the laboratory RT-PCR reference standard. Secondary analyses will include accuracy of the enhanced test strip image, accuracy of an automatic test strip reader algorithm, and validation of prediction rules for influenza based on self-reported symptoms. A post-test survey will be used to obtain participant feedback of self-test procedures.

**Ethics and dissemination:** The study was approved by the Human Research and Ethics Committee (HREC) at the University of Adelaide (H-2019-116). Protocol details and any amendments will be reported to <https://www.tga.gov.au/>. Results will be published in the peer reviewed literature, and shared with stakeholders in the primary care and diagnostics communities.

**Universal Trial Number (UTN):** U1111-1237-0688, registered on the Australia New Zealand Clinical Trial Registry:  
<https://www.anzctr.org.au/Trial/Registration/TrialReview.aspx?ACTRN=12619001087145>

## STRENGTHS AND LIMITATIONS OF THIS STUDY

- Accuracy of nasal self-testing for influenza using the QuickVue Influenza A+B assay will be compared to reference standard of nasal or nasopharyngeal swab obtained by a GP and tested using RT-PCR.
- Recruitment will be nested within an ongoing Australian Surveillance Practices Research Network recruiting patients presenting to general practice with influenza-like illness (ILI)

- Patients attending primary care with ILI may differ in terms of disease spectrum compared to individuals with ILI at home, which is the population where the self-test is intended to be used.
- Self-swabbing of the nose and conducting a lateral flow test unsupervised and guided by an app may select individuals with greater smartphone experience, manual dexterity, and/or sociodemographic status.
- Self-report of ILI symptoms using an app may differ from symptoms obtained from GP consultations or from research staff, limiting the ability to validate clinical prediction rules for influenza.

## INTRODUCTION

Seasonal influenza occurs annually, causing disease with substantial morbidity and mortality worldwide, especially in the elderly and those with chronic disease.[1] Despite the availability of the influenza vaccine, repeated influenza infections are common throughout life, and result in a considerable healthcare burden. In Australia, it is estimated that each year influenza causes an average 310,000 general practitioner (GP) consultations, 18,000 hospital admissions, and 1,500 to 3000 deaths.[2-4] Influenza places particular burden on primary care services during the winter months, contributing to high consultation rates for acute respiratory tract infections. Detection of influenza is thought to provide value clinically by identifying patients who may be at higher risk of complications, and also to potentially inform use of antivirals and efforts to reduce transmission.[5]

GPs generally diagnose influenza based on a combination of symptoms and risk factors present in each patient, and diagnostic confirmation requires a laboratory test.[5] Multiple tests are available for influenza, including immunoassays and molecular tests with varying levels of sophistication and cost, that can be used in different clinical settings.[6] While some point-of-care tests are approved for, and suitable in primary care settings, others can only be conducted in formal laboratory facilities.

Because there is considerable overlap in symptoms caused by influenza and other respiratory pathogens, many patients who are tested for influenza receive flu-negative results. To reduce the number of unnecessary tests that are requested by GPs, clinical prediction rules have been derived to stratify individuals more accurately than individual symptoms into those with various likelihood of influenza infection.[7] Currently there are no diagnostic tests for influenza that are approved for use by individuals outside of clinical settings in Australia or the United States. The ability to accurately test individuals at home for influenza could provide several potential advantages over current practice. One advantage for patients would be convenience by reducing the need for primary care consultations. Home-testing may also facilitate the earlier use of antivirals when they are most likely to provide beneficial effects on symptom resolution and reduce transmission, and help identify individuals at higher risk of complications compared to those with other causes of influenza-like illness (ILI).[8]

1  
2  
3 The primary aim of the current study is to determine the accuracy of a self-test for influenza that  
4 involves individuals self-swabbing their nose and conducting an immunoassay lateral flow test  
5 guided by a mobile app, compared to the gold standard RT-PCR influenza test obtained by their  
6 GP. Several studies have already demonstrated the feasibility of collecting patient-reported ILI  
7 symptoms.[9-13] This study expands on this field by leveraging smartphone mobile app to  
8 instruct participants through conducting a rapid diagnostic test (RDT). We also aimed to explore  
9 additional methods for reading the test strip, and validating existing clinical prediction rules for  
10 influenza.  
11  
12  
13  
14

## 15 **METHODS**

### 16 **Study Design**

17  
18  
19 A prospective observational study of the comparative accuracy of a patient-run, mobile app-  
20 guided (see Appendix A), lateral flow test for influenza (QuickVue Influenza A + B assay test,  
21 from Quidel Corporation) using a low nasal self-swab (referred to in this protocol as  
22 'flu@home'), compared to clinician-collected nasal or nasopharyngeal swab for influenza  
23 detected by a commercial RT-PCR. The Universal Trial Number (UTN) is U1111-1237-0688,  
24 registered on 6/08/2019. (See Figure 1).  
25  
26  
27  
28

### 29 **Study population**

30 A systematic sample of adult patients with ILI presenting to general practices participating in the  
31 Australia Sentinel Practices Research Network (ASPREN), which is a network of over 350  
32 general providers from over 200 sentinel sites throughout Australia. GPs in the network  
33 participate in routine surveillance studies of respiratory infections by the Commonwealth. [14,15]  
34 (See Appendix B for ASPREN protocol).  
35  
36  
37

### 38 **Inclusion and exclusion criteria**

39 Inclusion criteria are: 1) age  $\geq$  18 years, 2) presenting to ASPREN clinic sites [16] with fever,  
40 cough, and fatigue, 3) agree to have their GP/nurse practitioner obtain a nasal or  
41 nasopharyngeal swab for surveillance purposes, and 4) have their own Android or iOS  
42 smartphone or tablet. Exclusion criteria will be non-English speakers, people who are  
43 incarcerated, people highly dependent on medical care who may be unable to give consent, and  
44 people with a cognitive impairment, an intellectual disability or mental illness. We did not  
45 exclude people with physical disabilities or impaired vision, but rather left the decision to recruit  
46 a patient up to their GP at the time of their visit.  
47  
48  
49

### 50 **Recruitment**

51 Each clinic will recruit any patient presenting with an ILI who is 18 years and older, has a  
52 smartphone and agrees to participate in the study.  
53  
54

### 55 **Clinical setting**

1  
2  
3 Study participants will be recruited from practices participating in ASPREN, which is a network  
4 of sentinel GPs who report de-identified information on ILI as well as other infectious disease  
5 conditions.[16] The de-identified information will include date of symptom onset, influenza  
6 vaccination history, comorbidities related to influenza, and whether the patient is a health care  
7 worker. Data from ASPREN are used by State and Commonwealth Departments of Health for  
8 infectious disease surveillance and vaccine effectiveness estimates.[17] ASPREN data  
9 contribute to the Global Influenza Vaccine Effectiveness Movement and the World Health  
10 Organization Collaborating Centre for Reference and Research on Influenza (WHO-CCRI).  
11  
12  
13

## 14 Outcome measurements

### 15 Primary outcome

- 16 • Accuracy of detection of influenza A/B infection based on self-reading of the flu@home  
17 test compared to laboratory RT-PCR testing.  
18

### 19 Secondary outcomes

- 20 • Accuracy of detection of influenza A/B infection based on self-reading of an enhanced  
21 high contrast image of the flu@home test strip compared to laboratory RT-PCR testing.  
22
- 23 • Accuracy of detection of influenza A/B infection based on the app's automatic  
24 interpretation algorithm of the flu@home test strip image compared to laboratory PCR  
25 testing.  
26
- 27 • Accuracy of clinical prediction rules including the Flu Score [7] based on individual and  
28 combinations of presenting symptoms obtained from the app and/or the patient's GP  
29 compared to laboratory PCR testing.  
30
- 31 • Satisfaction and experience of patients interacting with the flu@home app.  
32

### 33 Other variables

34 The app will collect information on demographics (age, sex, race), household composition,  
35 influenza vaccination history, risk factors for influenza infection, presence and duration of ILI  
36 symptoms (e.g., cough, fever, fatigue, chills or sweats), (see Appendix C). These variables will  
37 be used to facilitate interpretation of test results in terms of these various participant  
38 characteristics.  
39  
40

## 41 Study procedures

42 Patients who participate in the ASPREN study will be invited to participate in the flu@home self-  
43 testing study from July 2019 until all 2300 kits are distributed, no later than December 2020.  
44 Each participating GP will be provided with a set number of test kits, based on the numbers of  
45 ILI patients encountered in previous flu seasons, and the number of ILI patients swabbed during  
46 the current 2019 flu season. Participating GPs will be asked to recruit all patients who meet  
47 study eligibility criteria. After completing the standard ASPREN protocol (see Appendix B), a GP  
48 will ask the participant if they would like to participate in the flu@home study. Once the  
49 participant consents, the GP will hand them the test kit and instructions for downloading the free  
50 app, and the patient will be asked to conduct the remainder of the study procedures at home on  
51 that day or the following day. A post-test survey will be sent to participants via the app 24-48  
52 after they complete the test procedure.  
53  
54  
55  
56  
57  
58  
59  
60

## Influenza testing methods

### Home/self-testing

Patients will be provided with a self-test kit by their GP containing a Quidel QuickVue Influenza A+B lateral flow test (rebranded as the flu@home kit for research purposes), and asked to download the free flu@home app [18] to their personal iOS or Android smartphone or tablet. Each test kit includes a unique 8-digit study ID number that will be linked to reference test results, but cannot be used to personally identify participants. The app collects the variables noted above through a questionnaire, and guides the patient through the self-swabbing and testing procedure. They will be instructed to obtain a low nasal swab using a single foam-tipped swab inserted into each nostril, and then perform the steps to conduct the lateral flow test.

Having completed the test steps, the app guides the patient to read their test strip by first asking them whether they see a blue line (control line) and any pink lines (1<sup>st</sup> interpretation). A pink line above the blue line indicates influenza A, and a pink line below the blue control line indicates influenza B. If the patient indicates they do not see the blue control line, they are informed that they have a defective test strip and interpretation guidance is not provided. For patients who indicate they see a blue control line, the app guides the patient to obtain a photo of their test strip using their smartphone camera. During this process the app provides a guided test strip image capture, including on-screen feedback to the participant to ensure proper alignment, lighting, positioning, scale, and rotation of the test strip prior to taking a photo. Once a photo of the strip is captured, the user is presented with a high-contrast image of their test strip and asked to reinterpret the test results by indicating how many lines they now see on the strip (2<sup>nd</sup> interpretation). Presenting a high-contrast image to the patient may help them see lines on the test strip that may have previously been too faint to easily identify. Initially, the app uses the patient's direct observation of the strip to inform the patient whether it is likely their test result was positive for influenza. During the study we may adjust this process to inform the patient of their likely test result based on auto-interpretation of the images captured.

While the test strip differentiates between influenza A and B, we will not ask individuals to make this determination. If the guided test strip image capture is not successful, the app requests the patient to manually take a normal photo of their test strip using their smartphone for later analysis. The app uses the patient's observations to inform the patient of their likely test result.

Patients will be given links to publicly-available information on influenza from healthdirect [19] and provided with usual care recommendations in the app depending on their test results (from either the 1<sup>st</sup> or 2<sup>nd</sup> interpretation). The app includes a medical disclaimer indicating "The interpretation of your result may differ from a medical test conducted in a clinical lab environment. In no circumstances should the results of this test be relied upon without independent consideration and confirmation by a qualified medical practitioner." [20] Patients will be notified of the results of the reference test by their GP, who will provide standard care based on the RT-PCR results. Study materials will clearly indicate that the flu@home test is an experimental research test, and participants should trust the reference test results provided by their GP. Participants whose flu@home results are discordant with those of their GP will be



1  
2  
3 asked to contact their GP for any clinical management decisions or changes that their GP would  
4 recommend.  
5

### 6 7 Reference testing

8 Influenza and other respiratory pathogens will be detected using RT-PCR on the swabs  
9 obtained by the GP at ASPREN clinical sites. (See Appendix B for list of pathogens tested).  
10 Samples will be sent to SA Pathology in Adelaide, South Australia, via Australia Post's Express  
11 post system, allowing for next-day delivery from all capital cities.[21] Results of the laboratory  
12 PCR test, home self-test kit, and survey data from the app will be linked by the 8-digit number  
13 available on the test kit and PCR sample.  
14  
15

### 16 17 Post-test survey

18 A link to a reflective online survey created in Qualtrics© will be delivered to participants who  
19 complete the test procedure. The request to complete the survey will be delivered via  
20 participants' smartphone or tablet 24-48 hours after completing their self-test. The survey will  
21 solicit responses regarding the respondent's a) health behaviors and attitudes, b) perceptions of  
22 their experience and usability of the self-test impact, c) perceived value of self-testing, and d)  
23 intention to act on self-test results. Survey items will be close-ended and, generally, call for a  
24 response to a five-point Likert scale with anchors ranging from strongly agree to strongly  
25 disagree (see Appendix D for follow-up survey items categorized by construct, i.e., focal topic).  
26  
27

### 28 29 Participant discontinuation

30 Individuals who start the app, provide consent, but fail to complete all steps of the test  
31 procedure will be excluded from the primary comparative accuracy analysis. If any participants  
32 who were swabbed by their GP as part of ASPREN surveillance test positive for flu, they will be  
33 contacted by their general practice clinic to discuss further clinical management; this will not be  
34 affected by failure to complete the flu@home procedure.  
35  
36

### 37 38 **Data analysis**

39 We will conduct a descriptive analysis of demographics, presenting symptoms, and baseline  
40 variables such as household composition, vaccination status, and general health questions.  
41 Prevalence of influenza will be obtained from positivity rate of PCR laboratory testing.  
42 Sensitivity, specificity, positive and negative predictive values (with 95% confidence intervals)  
43 will be calculated for the presence of influenza based on patient interpretation of self-test results  
44 compared to the reference standard PCR result. Accuracy will also be calculated for  
45 participants' interpretation of the enhanced high-contrast photo of the test strip, as well as the  
46 automatic test strip interpretation algorithm, compared to the reference standard PCR result. We  
47 will also measure the accuracy of clinical prediction rules based on individual and combinations  
48 of ILI symptoms based on Flu Score [7] and other prediction rules, compared to the reference  
49 standard PCR result. Subgroup analyses will explore test accuracy based on age, symptom  
50 profile, duration of illness, and influenza type (A/B).  
51  
52

53  
54 We will conduct a descriptive analysis of post-test survey results related to demographics,  
55 health behaviors and attitudes, experience and usability of the self-test, impact and perceived  
56  
57  
58  
59  
60

1  
2  
3 value of self-testing, and intention to act on self-test results. In addition, we will conduct  
4 Multivariate Analysis of Variance (MANOVA) to determine if statistically significant differences  
5 exist among various subpopulations (e.g., age group, gender) regarding their responses to  
6 survey items related to variables associated with experience and usability of the self-test and  
7 impact and perceived value of self-testing. MANOVA analysis permits simultaneous testing of  
8 the variables associated with one construct, e.g., experience and usability of the self-test,  
9 simultaneously to arrive at a holistic assessment and recognizes the potential correlation related  
10 to these variables. Analysis of Variance (ANOVA) will be used to determine if statistically  
11 significant differences exist among the responses from various subpopulations (e.g., age group,  
12 gender) to survey items related to intention to act on self-test results. We will also use Partial  
13 Least Squares Regression (PLS) to construct predictive models to assess relationships among  
14 demographics, health behaviors and attitudes, experience and usability of the self-test, impact  
15 and perceived value of self-testing, and intention to act on self-test results.  
16  
17  
18  
19

### 20 **Sample size calculation**

21 The sample size required for this study was determined based on i) expected completion rate of  
22 the home test kit, ii) flu positivity rate, iii) availability of test kit materials, and iv) number of flu-  
23 positive test results which are typically provided in FDA submissions for regulatory approval of  
24 rapid flu diagnostic tests. To our knowledge, there have been no other comparative accuracy  
25 studies of a smartphone-enabled respiratory illness diagnostic test conducted in Australia.  
26 Therefore, the expected completion rate of the home testing procedure is based on a USA-  
27 based pilot study that found that 60% of individuals completed the flu@home test kit when it  
28 was mailed to them. In the current study, we expect a higher completion rate given that  
29 participants will be recruited by their GP rather than online. The flu positivity rate among patients  
30 presenting with ILI to ASPREN clinics is based on data from previous years, which indicated a  
31 20% positivity rate among recruited adults (of all ages) in the July – December period.  
32 Assuming that 60% of the 2300 self-test kits distributed to GPs are completed (1380), we expect  
33 20% (276) to be influenza positive. This absolute number of flu positive specimens exceeds that  
34 required by FDA in regulatory submissions to evaluate the accuracy of new tests designed for  
35 clinical settings, which is typically 120.[22] There are not currently any recommendations for  
36 sample sizes needed for evaluation of the accuracy of home-based tests for influenza.  
37  
38  
39  
40  
41

### 42 **Indirect Patient and Public involvement**

43 The flu@home app has undergone several iterations of usability and user acceptance testing  
44 with a diverse population in the United States. This included usability testing conducted during a  
45 pilot phase in the USA using an independent user research firm, which provided input on app  
46 usability, time to conduct questionnaire, and the appearance and design of the app. There has  
47 not been any prior testing of the app in Australia, however, the research study members from  
48 Australia reviewed the app prior to launch to ensure the language in the app was appropriate for  
49 the Australian context.  
50  
51  
52

### 53 **Ethics and dissemination**

54 The study procedures will follow Australian clinical and ethical standards as outlined by the  
55 University of Adelaide Human Research Ethics Committee (HREC). All activities will follow the  
56  
57  
58  
59

Code of Good Practice in Clinical Research. Participants will provide informed consent for the flu@home study within the app that is downloaded. The study was approved by the Human Research and Ethics Committee at the University of Adelaide (HREC Number: H-2019-116). The authors will seek approval for any protocol modifications, which will also be reported to the clinical trials registration site. Results of this study will be reported using the STARD guidelines for reporting diagnostic accuracy studies, and published in the peer-reviewed scientific literature.[23]

### **Confidentiality and data management**

All study data collected are non-identifiable. No participant names, addresses, or private information are collected for the purposes of the study. Samples from the ASPREN survey and app data are linked via a unique barcode. The researchers cannot link the barcode to identifiable patient details such as name, address, or other private information. ASPREN surveillance data will be stored on University of Adelaide computers, which can only be accessed by authorized representatives. All data will be non-identifiable. All data collected by the flu@home app will be protected with industry-standard encryption on systems hosted through Amazon Web Services and the Google Cloud Platform, which are only accessible by authorized representatives of the app development organization, Audere. Audere is a non-profit application development organization that runs the flu@home application. During data analysis non-identifiable data will be transferred to a University of Washington approved data storage location, which is only accessible to authorized parties, and the University of Adelaide drives for analysis. Further information about confidentiality and data management in the mobile app can be found in Appendix A.

## **DISCUSSION**

Influenza is a common infection that occurs annually in the southern and northern hemispheres. Consultations for respiratory tract illnesses are one of the most common reasons for presentation in primary care settings in Australia and most other high- and middle-income countries.(2) In Australia influenza season occurs between the months of May to October.[24] Differentiating etiology of respiratory tract infection based on symptoms alone is limited, and current confirmatory diagnosis of respiratory pathogens involves laboratory testing.[22] Diagnostic tests for influenza are commonly used in laboratory settings, and in many countries are used in primary care or pharmacy settings.[25–27] Regulatory approval varies between countries, but typically tests approved for primary care involve simple point of care assays that do not require laboratory technician expertise.

We will use an existing rapid diagnostic test for influenza A and B that has been approved in the United States for use in primary care clinics since 2004 (QuickVue Influenza A + B assay test, from Quidel Corporation)[28]. This test has adequate performance as demonstrated by regulatory approval in the US, with a 2017-18 clinical study comparing this test to an FDA cleared A+B molecular test, showing sensitivity of 94% for Type A and 70% for Type B, and specificity of 90% for Type A and 97% for Type B[29,30]. However, we note that additional evaluations of this test (and similar lateral flow tests) for influenza show lower test accuracy in further clinical evaluations. A 2017 meta-analysis of 162 studies of rapid tests for influenza

1  
2  
3 found noted that the pooled sensitivity of such tests favored industry-sponsored studies by 6.2  
4 to 34.0%. [31]  
5

6  
7 The potential for individuals to test themselves for influenza follows a pathway for home-based  
8 testing that has revolutionized pregnancy testing with commonly available lateral flow assays,  
9 glucose testing using home-based monitors, as well as electronic devices for measuring blood  
10 pressure. While there is strong evidence that individuals are able to obtain swabs themselves  
11 from the nose or throat [32–34], there is no evidence currently for the accuracy of individuals  
12 performing a diagnostic test on self-obtained samples for influenza.  
13

14  
15 The potential value of a self-test for influenza could lead to changes in practice and behavior,  
16 assuming the test has sufficient accuracy. For individuals in the community, this could lead to  
17 faster diagnosis, improved access to diagnostic testing, improved diagnostic certainty, and  
18 reduced need to contact health care services. For primary health care services, it could reduce  
19 the burden of consultations for ILI and facilitate more rapid or targeted use of antivirals if these  
20 can be prescribed remotely (by telephone, or telemedicine consultations). In terms of public  
21 health, self-testing could also influence infection control and transmission reduction strategies at  
22 the community level. Combining a diagnostic test with a smartphone where the user's steps are  
23 process-controlled (e.g. embedded timers ensure the patient adheres to the test procedure)  
24 may both facilitate support for the user, and potentially allow enhanced interpretation of test  
25 results using the existing camera and software found in current devices. A downside to  
26 home/self-based testing for influenza is that easier access to testing could lead to the diagnosis  
27 of mild cases of influenza where antiviral treatment is not indicated. Increased access to self-  
28 testing include has financial implications including added costs to individuals who might have to  
29 purchase the tests, and to the healthcare system that might need to interpret, repeat or act on  
30 test results. Inaccurate tests could further cause harm through false negative and/or false  
31 positive results.  
32  
33  
34  
35

## 36 37 **LIMITATIONS OF STUDY**

38 The study has several potential limitations. First, recruitment of participants will not be entirely  
39 consecutive, although this follows the procedures that the participating clinics use for ongoing  
40 surveillance activities. Limiting this study to general practices means that some patients with ILI  
41 are excluded, such as those attending hospitals and emergency departments, receiving medical  
42 care from locum doctors or not seeking any medical treatment for ILI. Second, the spectrum of  
43 individuals presenting with ILI to GPs may be different to that expected in the community, with  
44 higher influenza prevalence, more severe symptoms, and/or longer time since onset of infection.  
45 The time point at which individuals present to their GP with influenza may have a critical impact  
46 on test sensitivity, as there is strong evidence that the sensitivity of rapid antigen influenza tests  
47 declines markedly beyond the initial 48-72 hours of illness.[35,36] Third, the performance of the  
48 nasal swab, and conduct of the lateral flow test is unsupervised, and therefore we will not be  
49 able to determine the impact of these factors on test accuracy. There is robust evidence that  
50 individuals are able to collect mid turbinate and low nasal swabs with similar performance to  
51 health care professionals for influenza, but we will not be able to further verify this in the current  
52 study. [37] Fourth, conduct of the test may vary with participant characteristics, such as age or  
53  
54  
55  
56  
57  
58  
59  
60

1  
2  
3 limitations in ability to handle smartphones, and their ability to visualize lines on the test strip.  
4 We will explore these using subgroup analyses (based on age), and user feedback from follow  
5 up surveys. Fifth, differences in interpretation of the enhanced image may depend on the  
6 technical capabilities of individuals' smartphones. Sixth, we are aware that the flu@home app  
7 has not been validated in this population and setting, and may need additional validation before  
8 being implemented or being used with a commercial device. Finally, while we do ask study  
9 participants about multiple aspects of their experience with the home-based influenza test, we  
10 will not ask specifically about their feelings regarding testing positive for influenza using a home-  
11 based test. Understanding the emotional impact of receiving a positive result using a self-test is  
12 out of scope for this study. Additionally, we will not be able to evaluate comparative costs of the  
13 flu@home test compared to usual care within this study.  
14  
15  
16  
17  
18

## 19 **FUNDING**

20 The Australian Sentinel Practices Research Network is supported by the Australian Government  
21 Department of Health (the Department). The opinions expressed in this paper are those of the  
22 authors, and do not necessarily represent the views of the Department.

23 The flu@home study is funded by Audere and Gates Ventures through the Brotman Baty  
24 Institute at the University of Washington. The funding reference number is UA194099 (in the  
25 University of Adelaide database). The study was conducted in association with the University of  
26 Adelaide in Australia, and the University of Washington in the United States. QuickVue  
27 Influenza A+B test kit supplies were donated by Quidel Corporation. Gates Ventures and Quidel  
28 Corporation were not involved in the design of the study, does not have any ownership over the  
29 management and conduct of the study, the data, or the rights to publish.  
30  
31  
32

## 33 **ACKNOWLEDGEMENTS**

34 We acknowledge the support of the Seattle Flu Study Research Team, the participating clinics  
35 in the Australia Sentinel Practices Research Network (ASPREN), and John Tamerius from  
36 Quidel Corporation for providing the QuickVue Influenza A+B test kit supplies.  
37  
38  
39  
40

## 41 **Figure Legend**

42 Figure 1. flu@home Australia study procedure  
43  
44  
45  
46  
47  
48  
49  
50  
51  
52  
53  
54  
55  
56  
57  
58  
59  
60

## Contributorship statement

All persons who meet authorship criteria are listed as authors, and all authors certify that they have participated sufficiently in the work to take public responsibility for the content, including participation in the concept, design, analysis, writing, or revision of the manuscript. Additionally, each author certifies that this material or similar material has not been and will not be submitted to publication before its appearance in BMJ Open.

**Conception or design of the work:** Victoria Lyon, Monica Zigman Suchsland, Monique Chilver, Nigel Stocks, Barry Lutz, Shawna Cooper, Cynthia LeRouge, Matthew Thompson

**flu@home end-to-end app development and technical support:** Shawna Cooper, Philip Su,

**Image capture and interpretation feature development:** Libby Rose Lavitt, Chunjong Park, Alex Mariakakis, Shwetak Patel

**Managed ASPREN network communication and GP recruitment:** Monique Chilver, Nigel Stocks

**Managed logistics of funding, obtaining and shipping test kits:** Chelsey Graham, Mark Rieder

**Follow-up survey design:** Cynthia LeRouge, Victoria Lyon

**Drafting the article:** Victoria Lyon, Monica Zigman Suchland, Barry Lutz, Shawna Cooper, Matthew Thompson

**Critical revision of the article:** Victoria Lyon, Monica Zigman Suchland, Matthew Thompson

**Final approval of the version to be published:** Victoria Lyon, Monica Zigman Suchsland, Monique Chilver, Nigel Stocks, Barry R. Lutz, Philip Su, Shawna Cooper, Chunjong Park, Libby Rose Lavitt, Alex Mariakakis, Shwetak Patel, Chelsey Graham, Mark Rieder, Cynthia LeRouge, Matthew Thompson

Guarantors: Barry Lutz, Matthew Thompson

## Competing Interests

The authors do not have any competing interests.

## References

1. Call to Action: The Dangers of Influenza and Benefits of Vaccination in Adults with Chronic Health Conditions [Internet]. National Foundation for Infectious Diseases; 2018 Sep p. 1–19. Available from: <http://www.nfid.org/idinfo/influenza/cta-dangers-of-influenza-in-adults-with-chronic-health-c.pdf>
2. Newall AT, Scuffham PA, Hodgkinson B. Economic Report into the Cost of Influenza to the Australian Health System; Report to the Influenza Specialist Group [Internet]. 2007 Mar p. 1–19. Available from: <http://www.isg.org.au/assets/Uploads/ISG-Cost-of-Influenza/isg-cost-influenza-report-30-2007.pdf>
3. Healthdirect Australia. Colds and flu statistics [Internet]. 2019 [cited 2019 Jul 26]. Available from: <https://www.healthdirect.gov.au/colds-and-flu-statistics>
4. Influenza Fast Facts [Internet]. Influenza Specialist Group (ISG). 2020 [cited 2020 Jun 15]. Available from: <http://www.isg.org.au/index.php/clinical-information/influenza-fast-facts/>
5. Influenza Signs and Symptoms and the Role of Laboratory Diagnostics | CDC [Internet]. 2019 [cited 2019 Jul 29]. Available from: <https://www.cdc.gov/flu/professionals/diagnosis/labrolesprocedures.htm>
6. Overview of Influenza Testing Methods | CDC [Internet]. 2019 [cited 2019 Jul 26]. Available from: <https://www.cdc.gov/flu/professionals/diagnosis/overview-testing-methods.htm>
7. van Vugt SF, Broekhuizen BD, Zuithoff NP, van Essen GA, Ebell MH, Coenen S, et al. Validity of a clinical model to predict influenza in patients presenting with symptoms of lower respiratory tract infection in primary care. *Fam Pract*. 2015 Aug;32(4):408–14.
8. Lindstrom S PhD. Public Health Perspective on Potential Benefits and Risks of OTC Influenza Diagnostics [Internet]. Influenza Division, Centers for Disease Control and Prevention; 2016 Aug. Available from: <https://www.fda.gov/media/99888/download>
9. Lwin MO, Yung CF, Yap P, Jayasundar K, Sheldenkar A, Subasinghe K, et al. FluMob: Enabling Surveillance of Acute Respiratory Infections in Health-care Workers via Mobile Phones. *Front Public Health* [Internet]. 2017 Mar 17 [cited 2020 Jun 12]; Available from: [http://link.gale.com/apps/doc/A485889167/AONE?u=wash\\_main&sid=zotero&xid=f1069818](http://link.gale.com/apps/doc/A485889167/AONE?u=wash_main&sid=zotero&xid=f1069818)
10. Hsuen Y, Brownstein JS, Liu J, Hawkins JB. Use of a Digital Health Application for Influenza Surveillance in China. *Am J Public Health*. 2017 May 18;107(7):1130–6.

11. Kim M, Yune S, Chang S, Jung Y, Sa SO, Han HW. The Fever Coach Mobile App for Participatory Influenza Surveillance in Children: Usability Study. *JMIR MHealth UHealth* [Internet]. 2019 Oct 17 [cited 2020 Jun 12];7(10). Available from: <https://www.ncbi.nlm.nih.gov/pmc/articles/PMC6823603/>
12. Smolinski MS, Crawley AW, Baltrusaitis K, Chunara R, Olsen JM, Wójcik O, et al. Flu Near You: Crowdsourced Symptom Reporting Spanning 2 Influenza Seasons. *Am J Public Health*. 2015 Oct;105(10):2124–30.
13. Dalton C, Carlson S, Butler M, Cassano D, Clarke S, Fejsa J, et al. Insights From Flutracking: Thirteen Tips to Growing a Web-Based Participatory Surveillance System. *JMIR Public Health Surveill*. 2017 Aug 17;3(3):e48.
14. Parrella A, Dalton C, Pearce R, Litt J, Stocks N. ASPREN surveillance system for influenza-like illness A comparison with FluTracking and the National Notifiable Diseases Surveillance System. *Aust Fam Physician*. 2009 Nov 1;38:932–6.
15. Varghese BM, Dent E, Chilver M, Cameron S, Stocks NP. Epidemiology of viral respiratory infections in Australian working-age adults (20–64 years): 2010–2013. *Epidemiol Infect*. 2018 Apr;146(5):619–26.
16. Aspren Mission [Internet]. ASPREN. [cited 2019 Jul 26]. Available from: <http://www.aspren.com.au/MissionAndVision.html>
17. Sullivan SG, Chilver MB, Carville KS, Deng Y-M, Grant KA, Higgins G, et al. Low interim influenza vaccine effectiveness, Australia, 1 May to 24 September 2017. *Euro Surveill Bull Eur Sur Mal Transm Eur Commun Dis Bull*. 2017 Oct;22(43).
18. flu@home Australia Research Study [Internet]. flu@home Australia Research Study. [cited 2019 Jul 26]. Available from: <http://fluathome.org.au>
19. healthdirect: Free Australian health advice you can count on [Internet]. healthdirect. 2018 [cited 2019 Aug 21]. Available from: <https://www.healthdirect.gov.au/>
20. flu@home Mobile App. Audere; 2020.
21. Influenza vaccine effectiveness in Australia: results from the Australian Sentinel Practices Research Network | The Medical Journal of Australia [Internet]. [cited 2019 Jul 29]. Available from: <https://www.mja.com.au/journal/2014/201/2/influenza-vaccine-effectiveness-australia-results-australian-sentinel-practices>
22. Recommendations for Clinical Laboratory Improvement Amendments of 1988 (CLIA) Waiver Applications for Manufacturers of In Vitro Diagnostic Devices - Guidance for Industry and Food and Drug Administration Staff [Internet]. U.S. Food & Drug Administration. 2008 [cited 2019 Jul 29]. Available from: <https://www.fda.gov/regulatory-information/search-fda-guidance-documents/recommendations-clinical-laboratory-improvement-amendments-1988-clia-waiver-applications>



23. Cohen JF, Korevaar DA, Altman DG, Bruns DE, Gatsonis CA, Hooft L, et al. STARD 2015 guidelines for reporting diagnostic accuracy studies: explanation and elaboration. *BMJ Open*. 2016 Nov 1;6(11):e012799.
24. Tay EL, Grant K, Kirk M, Mounts A, Kelly H. Exploring a Proposed WHO Method to Determine Thresholds for Seasonal Influenza Surveillance. *PLOS ONE*. 2013 Oct 11;8(10):e77244.
25. World Health Organization. WHO Interim Global Epidemiological Surveillance Standards for Influenza [Internet]. 2012 [cited 2019 Jul 29]. Available from: <https://www.who.int/influenza/resources/documents/INFSURVMANUAL.pdf>
26. Montalto NJ. An Office-Based Approach to Influenza: Clinical Diagnosis and Laboratory Testing. *Am Fam Physician*. 2003 Jan 1;67(1):111–8.
27. Koski RR, Klepser ME. A systematic review of rapid diagnostic tests for influenza: considerations for the community pharmacist. *J Am Pharm Assoc*. 2017 Jan 1;57(1):13–9.
28. FDA Grants CLIA-Waived Status to Quidel's QuickVue Influenza A+B Test [Internet]. Businesswire. 2004 [cited 2020 May 27]. Available from: <https://www.businesswire.com/news/home/20040225005146/en/FDA-Grants-CLIA-Waived-Status-Quidels-QuickVue-Influenza>
29. QuickVue Influenza A+B Test - CLIA Complexity: WAIVED [package insert] [Internet]. Quidel Corporation; [cited 2020 May 27]. Available from: <https://www.quidel.com/immunoassays/rapid-influenza-tests/quickvue-influenza-test>
30. Influenza A+B Test - Frequently Asked Questions [Internet]. Quidel Corporation; 2018 [cited 2020 May 27]. Available from: <https://www.quidel.com/immunoassays/rapid-influenza-tests/quickvue-influenza-test>
31. Merckx J, Wali R, Schiller I, Caya C, Gore GC, Chartrand C, et al. Diagnostic Accuracy of Novel and Traditional Rapid Tests for Influenza Infection Compared With Reverse Transcriptase Polymerase Chain Reaction: A Systematic Review and Meta-analysis. *Ann Intern Med*. 2017 Sep 19;167(6):394–409.
32. Murray MA, Schulz LA, Furst JW, Homme JH, Jenkins SM, Uhl JR, et al. Equal performance of self-collected and health care worker-collected pharyngeal swabs for group a streptococcus testing by PCR. *J Clin Microbiol*. 2015 Feb;53(2):573–8.
33. Akmatov MK, Gatzemeier A, Schughart K, Pessler F. Equivalence of Self- and Staff-Collected Nasal Swabs for the Detection of Viral Respiratory Pathogens. *PLoS ONE* [Internet]. 2012 Nov 14 [cited 2019 Jul 29];7(11). Available from: <https://journals.plos.org/plosone/article?id=10.1371/journal.pone.0048508>

- 1  
2  
3 34. Wenham C, Gray ER, Keane CE, Donati M, Paolotti D, Pebody R, et al. Self-  
4 Swabbing for Virological Confirmation of Influenza-Like Illness Among an Internet-  
5 Based Cohort in the UK During the 2014-2015 Flu Season: Pilot Study. *J Med*  
6 *Internet Res.* 2018 01;20(3):e71.  
7  
8  
9 35. Green DA, StGeorge K. Rapid Antigen Tests for Influenza: Rationale and  
10 Significance of the FDA Reclassification. Kraft CS, editor. *J Clin Microbiol.* 2018  
11 Oct 1;56(10):e00711-18.  
12  
13 36. Chartrand C, Leeflang MMG, Minion J, Brewer T, Pai M. Accuracy of Rapid  
14 Influenza Diagnostic Tests: A Meta-analysis. *Ann Intern Med.* 2012 Apr  
15 3;156(7):500–11.  
16  
17 37. Seaman CP, Tran LTT, Cowling BJ, Sullivan SG. Self-collected compared with  
18 professional-collected swabbing in the diagnosis of influenza in symptomatic  
19 individuals: A meta-analysis and assessment of validity. *J Clin Virol Off Publ Pan*  
20 *Am Soc Clin Virol.* 2019;118:28–35.  
21  
22  
23  
24  
25  
26  
27  
28  
29  
30  
31  
32  
33  
34  
35  
36  
37  
38  
39  
40  
41  
42  
43  
44  
45  
46  
47  
48  
49  
50  
51  
52  
53  
54  
55  
56  
57  
58  
59  
60

1  
2  
3  
4  
5  
6  
7  
8  
9  
10  
11  
12  
13  
14  
15  
16  
17  
18  
19  
20  
21  
22  
23  
24  
25  
26  
27  
28  
29  
30  
31  
32  
33  
34  
35  
36  
37  
38  
39  
40  
41  
42  
43  
44  
45  
46  
47  
48  
49  
50  
51  
52  
53  
54  
55  
56  
57  
58  
59  
60

flu@home Australia study procedure

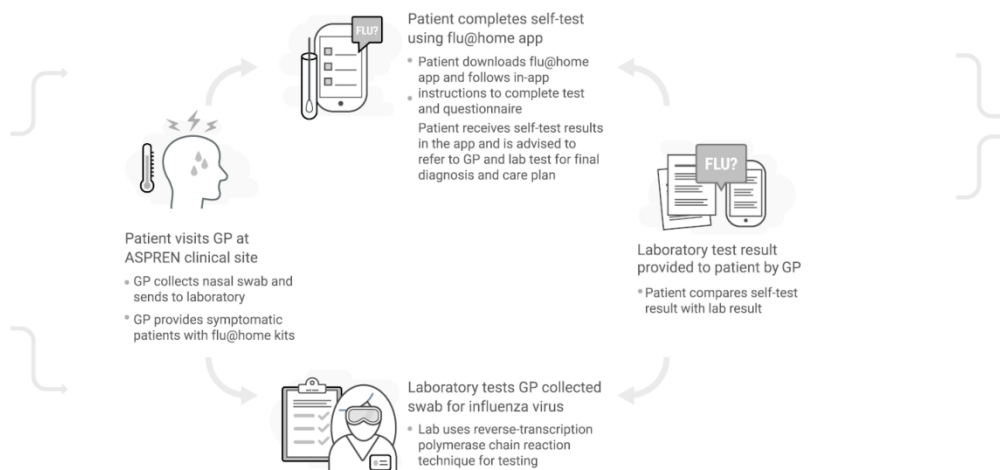

\*V1 - Test result is based on patient interpretation of test strip  
 \*V2 - Test result is based on patient interpretation of an enhanced image of the test strip  
 \*V3 - Test result is based on auto-interpretation performed within the app

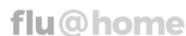

flu@home Australia study procedure

121x81mm (300 x 300 DPI)

## APPENDIX

### Appendix A: App design and operation

The flu@home app can be used on an iPhone, iPad, Android smartphone, or Android tablet. The app is available in English for the study. However, the app supports development and release of other languages as needed. The entire app experience uses a touch-sensitive dynamic interface on the device. The app ensures the proper test procedure is followed through clear instructions and timers that prevent the participant from moving forward in the test process (e.g., when the test strip must remain in the test fluid for ten minutes to be certain the strip has enough time to process before reading the result). The app attempts to keep participants engaged during wait times by providing flu-related informational facts (during an initial one-minute timer when the nasal swab is processing in the RDT vial) and asking the participant to answer a set of demographic and illness-related survey questions (during the ten-minute timer). Field-level validation is employed to ensure participants answer specific required questions in the survey.

The app was built using React Native, a JavaScript framework used to create mobile applications for iOS and Android. The app communicates with the Google Cloud Platform (Firebase) to queue survey data and Firebase storage to queue images captured from the RDT flow. These are pulled by a NodeJS service into a PostgreSQL database hosted on an AWS Relational Database Service (RDS), which allows for operation and scale of a relational database in the cloud.

The flu@home Australia app is available for personal devices which are expected to be under control of an individual who uses a passcode to access the device. All supported devices use encryption to protect app data resident on the device. This encryption is afforded by the device itself, not a specific application. In the event that a device is stolen, the device's onboard locking feature is the front-line defense against access to data on the device. The flu@home application does not collect the user's name, email, or other key identifiable information in the app. It focuses on data collection of symptoms, disease presentation, and demographics. The level of data protection offered by the flu@home app is the same level of protection afforded to most other health applications, email, messaging, etc. available on a mobile device.

App data is stored in Amazon Web Services (AWS S3 and AWS RDS). Amazon Simple Store Service (S3) provides a straightforward web services interface that is used to store and retrieve data, such as PCR data from the swab taken as part of the ASPREN study and used for comparison to the RDT test results. Access to S3 requires user authentication. From the time data leaves the client, all data is encrypted both at rest and over communication links. We use AWS Key Management Service (KMS) to encrypt data at rest in AWS, and Google Cloud Platform automatically encrypts its data using Advanced Encryption Standard (AES). All connections to the app occur over Secure Sockets Layer (SSL), a standard security technology that establishes an encrypted link between a web server and browser, ensuring all data traversing the web server and browser remains private.

1  
2  
3  
4  
5  
6 For near real-time reporting, Metabase is run in an Elastic Container Service (ECS) in the same  
7 AWS project referencing the same app data.  
8

9 The app uses Firebase caching and analytics to track each participant page view, including a  
10 timestamp for each page view. Firebase is also used to track changed answers if a participant  
11 navigates back in the app flow.  
12  
13  
14  
15  
16  
17  
18  
19  
20  
21  
22  
23  
24  
25  
26  
27  
28  
29  
30  
31  
32  
33  
34  
35  
36  
37  
38  
39  
40  
41  
42  
43  
44  
45  
46  
47  
48  
49  
50  
51  
52  
53  
54  
55  
56  
57  
58  
59  
60

## Appendix B: Australia Sentinel Practices Research Network (ASPREN) Protocol

The protocol for ASPREN clinical sites requires GPs to sample the first three ILI patients each week during flu season (May – October 2019 inclusive), and the first ILI patient of the week from November 2019– April 2020 inclusive. For the flu@home study, GPs will be allowed to recruit all adult patients presenting to the clinic with ILI symptoms, in order to meet recruitment goals. Participating clinical sites will obtain a nasal or nasopharyngeal swab which will be transported to SA Pathology, Adelaide, South Australia for testing using RT-PCR for influenza A, influenza B, as well as RSV, enterovirus, adenovirus, mycopneumoniae, human metapneumovirus, parainfluenza 1, 2, 3 and pertussis. Samples positive for influenza A will be further subtyped. All original clinical samples testing positive for influenza will be referred to the WHO-CCRR (Melbourne, Australia) for antigenic and phylogenetic characterization. For clinical sites in tropical regions, due to the decreased seasonality of influenza, the systematic sample involves the first three ILI patients of each week, all year round. In addition to this, in all sites all ILI patients ages 65 years and over are tested all year round.

## Appendix C: Flu@home Participant Questionnaire

### Symptom Survey

Questions marked with an \* are required.

| Symptom                       | *Which of the following were present during your illness? | *How long ago did symptoms start?<br>(Select the time frame that best applies) | *Were these symptoms present in the last 48 hours? | *How severe were your symptoms?<br>(Select the level of discomfort you felt at the worst point) |
|-------------------------------|-----------------------------------------------------------|--------------------------------------------------------------------------------|----------------------------------------------------|-------------------------------------------------------------------------------------------------|
| Fever                         | YES/NO                                                    | 1 day, 2 days, 3 days, 4+ days                                                 | YES/NO                                             | mild, moderate, severe                                                                          |
| Cough                         | YES/NO                                                    | 1 day, 2 days, 3 days, 4+ days                                                 | YES/NO                                             | mild, moderate, severe                                                                          |
| Feeling more tired than usual | YES/NO                                                    | 1 day, 2 days, 3 days, 4+ days                                                 | YES/NO                                             | mild, moderate, severe                                                                          |
| Chills or sweats              | YES/NO                                                    | 1 day, 2 days, 3 days, 4+ days                                                 | YES/NO                                             | mild, moderate, severe                                                                          |
| Sore throat                   | YES/NO                                                    | 1 day, 2 days, 3 days, 4+ days                                                 | YES/NO                                             | mild, moderate, severe                                                                          |
| Headache                      | YES/NO                                                    | 1 day, 2 days, 3 days, 4+ days                                                 | YES/NO                                             | mild, moderate, severe                                                                          |
| Muscle or body aches          | YES/NO                                                    | 1 day, 2 days, 3 days, 4+ days                                                 | YES/NO                                             | mild, moderate, severe                                                                          |
| Runny or stuffy nose          | YES/NO                                                    | 1 day, 2 days, 3 days, 4+ days                                                 | YES/NO                                             | mild, moderate, severe                                                                          |
| Shortness of breath           | YES/NO                                                    | 1 day, 2 days, 3 days, 4+ days                                                 | YES/NO                                             | mild, moderate, severe                                                                          |
| Vomiting                      | YES/NO                                                    | 1 day, 2 days, 3 days, 4+ days                                                 | YES/NO                                             | mild, moderate, severe                                                                          |

### General exposure

In the next section, the questions are going to be about being **in contact** with people who seemed to have a cold or the flu. **In contact** means being within two meters of them for at least two minutes or physical contact for any amount of time.

1  
2  
3 *For reference, two meters is about the distance between you and someone sitting two rows*  
4 *ahead of you on the bus.*  
5

6 **In the past week, have you been in contact with a person who seemed to have a cold or**  
7 **flu?**

- 8 • Yes
- 9 • No
- 10 • Don't know
- 11
- 12

13 **[If YES] Were they coughing or sneezing?**

- 14 ○ Yes
- 15 ○ No
- 16 ○ Don't know
- 17
- 18

19 **In the past week, have you been in contact with any children under five years old for over**  
20 **an hour?**

- 21 • No contact with children under 5 yrs
- 22 • 1 child
- 23 • 2-5 children
- 24 • More than 5 children
- 25 • Don't know
- 26
- 27

28 **Are there any children under 18 years old in your household?**

- 29 • Yes
- 30 • No
- 31 • Don't know
- 32

33 **[If YES] Do any children in your household attend a school, childcare setting, or**  
34 **play group with at least three other children for a total of three or more hours per**  
35 **week?**

- 36 • Yes
- 37 • No
- 38 • Don't know
- 39
- 40

41 **How many people live in your household (including you)?**

- 42 • 1-2
- 43 • 3-4
- 44 • 5-7
- 45 • 8+
- 46

47 **How many bedrooms are in your home?**

- 48 • 0-1
- 49 • 2
- 50 • 3
- 51 • 4
- 52 • 5+
- 53

54 **Influenza vaccination**  
55  
56  
57  
58  
59  
60



We would like to ask you some questions about your influenza vaccination history. This information will be used to determine how effective the vaccine is.

**Did you receive an influenza vaccination this year (2019\*)?**

- Yes
- No
- Do not know
- I've never received an influenza vaccination.

**[If YES] what was the approximate date of your influenza vaccination?**

- Choose month and year starting from January 2019\* up to the current month

**[If YES] Did you receive a free influenza vaccination under the National Immunisation Program in 2019\*?**

- Yes
- No
- Do not know

[If YES] What medical condition(s) do you have that made you eligible for a free influenza vaccination?

- Free text field

[If Answer to above is something other than: "I've never received an influenza vaccination"] Did you receive an influenza vaccination last year (2018\*)?

- Yes
- No
- Do not know

**General health**

Next we'd like to ask you some questions about your overall health:

**Have you ever been told by a doctor that you have one of the following medical conditions? (SELECT ALL THAT APPLY)**

- Asthma
- COPD/emphysema
- Diabetes
- Heart disease
- None of these
- Do not know

**Are you a healthcare (or aged care) worker (i.e. do you directly work with patients/aged care residents in your job)?**

- Yes
- No
- Do not know

**Do you smoke tobacco?**

- Yes
- No

1  
2  
3  
4 **Does anyone in your household smoke tobacco?**

- 5 ● Yes  
6 ● No  
7

8 **Is your illness preventing you from going to work or school, going to social events, or**  
9 **exercising/working out?**

- 10 ● Yes  
11 ● No  
12

13  
14 **Are you currently taking antibiotics (e.g. Amoxil, penicillin, azithromycin, co-trimoxazole**  
15 **(Bactrim), co-amoxiclav (Augmentin)) or antivirals (e.g. Tamiflu, Xofluza, Relenza)**  
16 **prescribed by a doctor (GP or hospital) for this illness?**

- 17 ● Yes  
18 ● No  
19 ● Do not know  
20

21 **How old are you?**

- 22 ● 18 to 19  
23 ● 20 to 24  
24 ● 25 to 29  
25 ● 30 to 34  
26 ● 35 to 39  
27 ● 40 to 44  
28 ● 45 to 49  
29 ● 50 to 54  
30 ● 55 to 59  
31 ● 60 to 64  
32 ● 65 to 69  
33 ● 70 to 74  
34 ● 75 to 79  
35 ● 80 to 84  
36 ● 85 to 89  
37 ● 90 and older  
38  
39  
40

41 **What is the sex on your medical records?**

- 42 ● Male  
43 ● Female  
44 ● Indeterminate/Other  
45 ● Prefer not to say  
46

47 **How would you describe your race?** Please select all that apply.

- 48 ● Aboriginal  
49 ● Torres Strait Islander  
50 ● Pacific Islander  
51 ● North or East Asian  
52 ● African  
53 ● European  
54 ● White Australian  
55  
56  
57  
58  
59  
60

- South or Central American
- Middle East/North African
- Indian subcontinent
- Other

[The next question is asked after the flu rapid test is complete]

**Nice job! Do you feel you performed all of the steps in the flu test correctly? Select the most applicable option**

- It was easy to follow and I think I completed the test correctly
- It was a little confusing but I think I did the test correctly
- It was very confusing and I'm not sure I completed the test correctly
- During the test, I realized I did something incorrectly

*\* All questions with an asterisk listed by the year will be updated in the mobile app in January 2020 (i.e. questions referring to "this year" will list 2020 instead of 2019.)*

## Appendix D: Follow-Up Survey Variables

| Category                                                                        | Questions asked                                                                                                                                                                                                     |
|---------------------------------------------------------------------------------|---------------------------------------------------------------------------------------------------------------------------------------------------------------------------------------------------------------------|
| Health behaviors and attitudes                                                  | I believe taking an active role in my own care is the most important factor in determining my health.*                                                                                                              |
|                                                                                 | I am confident that I can identify when it is necessary to get medical care versus when I can handle the problem myself.*                                                                                           |
|                                                                                 | I often think carefully about whether health information makes sense in my particular situation.*                                                                                                                   |
|                                                                                 | I acknowledge that I have a key role in the day-to-day management of my health.*                                                                                                                                    |
|                                                                                 | I often need someone to help me when I receive written information from my GP, nurse or pharmacist.*                                                                                                                |
|                                                                                 | In general, I believe the state of my health is:**                                                                                                                                                                  |
|                                                                                 | I am confident that I can tell my GP concerns I have even when he/she does not ask about them.*                                                                                                                     |
|                                                                                 | I like to find out a lot of information about health online.*                                                                                                                                                       |
|                                                                                 | I am confident that I can follow through on medical treatments I need to do at home.*                                                                                                                               |
|                                                                                 | I value my health more than anything else.*                                                                                                                                                                         |
|                                                                                 | My health needs are always met from available healthcare resources.*                                                                                                                                                |
|                                                                                 | As well as seeing my GP, I regularly monitor (check for) changes in my health.*                                                                                                                                     |
|                                                                                 | I do what is necessary to keep myself healthy.*                                                                                                                                                                     |
| My GP and I work together to make decisions about what's best for my health.*** |                                                                                                                                                                                                                     |
|                                                                                 |                                                                                                                                                                                                                     |
| Experience/                                                                     | The purpose of using flu@home was to:<br><div style="display: flex; justify-content: space-between; width: 100%;"> <span>_____</span> <span>Yes</span> <span>_____</span> <span>No</span> <span>_____</span> </div> |

|                                                         |                                                                                                               |                       |                       |
|---------------------------------------------------------|---------------------------------------------------------------------------------------------------------------|-----------------------|-----------------------|
| usability                                               | Test for flu                                                                                                  | <input type="radio"/> | <input type="radio"/> |
|                                                         | Give me information about flu and medicine                                                                    | <input type="radio"/> | <input type="radio"/> |
|                                                         | Test different flu medicines                                                                                  | <input type="radio"/> | <input type="radio"/> |
|                                                         | Participate in a research study about the flu                                                                 | <input type="radio"/> | <input type="radio"/> |
|                                                         | I am satisfied with how easy it was to use flu@home (nasal swab test and app).*                               |                       |                       |
|                                                         | I had the skills needed to perform swab testing using flu@home.*                                              |                       |                       |
|                                                         | I was able to understand the results from the flu@home app.*                                                  |                       |                       |
|                                                         | The instructions for using flu@home were helpful in providing me with what I needed to perform the test.*     |                       |                       |
|                                                         | Using flu@home <b>app</b> was:****                                                                            |                       |                       |
|                                                         | Doing the flu@home <b>nasal swab test</b> was:****                                                            |                       |                       |
| Entering my information into the flu@home app was: **** |                                                                                                               |                       |                       |
| Impact/<br>perceived<br>value                           | I would recommend flu@home to a friend or family member.*                                                     |                       |                       |
|                                                         | My GP was very supportive of me using flu@home.*                                                              |                       |                       |
|                                                         | It saves time to do a home-based test like flu@home before visiting a healthcare provider.*                   |                       |                       |
|                                                         | I feel that flu@home could help me better manage my illness.*                                                 |                       |                       |
| Intention to<br>Act                                     | If flu@home testing indicated you had the flu, which of the following would you consider doing as next steps? |                       |                       |
|                                                         |                                                                                                               | I would consider      |                       |
|                                                         |                                                                                                               | Yes                   | No                    |
|                                                         | A virtual consultation with a provider (telemedicine visit)                                                   | <input type="radio"/> | <input type="radio"/> |
|                                                         | Sharing my results anonymously with a national flu tracking system                                            | <input type="radio"/> | <input type="radio"/> |

|  |                                                                                                                                                 |                       |                       |
|--|-------------------------------------------------------------------------------------------------------------------------------------------------|-----------------------|-----------------------|
|  | Reading flu@home tips on how to prevent flu spread                                                                                              | <input type="radio"/> | <input type="radio"/> |
|  | Encouraging others in my household to use flu@home for testing                                                                                  | <input type="radio"/> | <input type="radio"/> |
|  | I would use the flu@home kit in the future if I have symptoms.*                                                                                 |                       |                       |
|  | I would do the flu@home test if I could purchase the test kit online to send to my home, rather than see my healthcare provider for diagnosis.* |                       |                       |

\* Responses on Likert scale anchored with 'Strongly Disagree' and 'Strongly Agree'

\*\* Responses on Likert scale anchored with 'Very Poor' and 'Excellent'

\*\*\* Responses on Likert scale anchored with 'Never' and 'Always'

\*\*\*\* Responses on Likert scale anchored with 'Very Easy' and 'Very Difficult'

# BMJ Open

## Diagnostic accuracy of an app-guided, self-administered test for influenza among individuals presenting to general practice with influenza-like illness: Study protocol

|                                 |                                                                                                                                                                                                                                                                                                                                                                                                                                                                                                                                                                                                                                                                                                                                                                                                                                                                                                                                   |
|---------------------------------|-----------------------------------------------------------------------------------------------------------------------------------------------------------------------------------------------------------------------------------------------------------------------------------------------------------------------------------------------------------------------------------------------------------------------------------------------------------------------------------------------------------------------------------------------------------------------------------------------------------------------------------------------------------------------------------------------------------------------------------------------------------------------------------------------------------------------------------------------------------------------------------------------------------------------------------|
| Journal:                        | <i>BMJ Open</i>                                                                                                                                                                                                                                                                                                                                                                                                                                                                                                                                                                                                                                                                                                                                                                                                                                                                                                                   |
| Manuscript ID                   | bmjopen-2019-036298.R3                                                                                                                                                                                                                                                                                                                                                                                                                                                                                                                                                                                                                                                                                                                                                                                                                                                                                                            |
| Article Type:                   | Protocol                                                                                                                                                                                                                                                                                                                                                                                                                                                                                                                                                                                                                                                                                                                                                                                                                                                                                                                          |
| Date Submitted by the Author:   | 15-Oct-2020                                                                                                                                                                                                                                                                                                                                                                                                                                                                                                                                                                                                                                                                                                                                                                                                                                                                                                                       |
| Complete List of Authors:       | Lyon, Victoria; University of Washington, Family Medicine;<br>Zigman Suchsland, Monica; University of Washington,<br>Chilver, Monique; The University of Adelaide<br>Stocks, Nigel; University of Adelaide, Discipline of General Practice<br>Lutz, Barry; University of Washington, Bioengineering<br>Su, Philip<br>Cooper, Shawna<br>Park, Chunjong; University of Washington, Computer Science<br>Lavitt, Libby Rose; University of Washington, Computer Science<br>Mariakakis, Alex; University of Washington, Computer Science<br>Patel, Shwetak ; University of Washington, Computer Science<br>Graham, Chelsea; University of Washington, 6. Brotman Bay Institute for<br>Precision Medicine<br>Rieder, Mark; University of Washington, Brotman Baty Institute<br>LeRouge, Cynthia; Florida International University, College of Business<br>Thompson, Matthew; University of Washington, Department of Family<br>Medicine |
| <b>Primary Subject Heading</b>: | Infectious diseases                                                                                                                                                                                                                                                                                                                                                                                                                                                                                                                                                                                                                                                                                                                                                                                                                                                                                                               |
| Secondary Subject Heading:      | Research methods, Respiratory medicine                                                                                                                                                                                                                                                                                                                                                                                                                                                                                                                                                                                                                                                                                                                                                                                                                                                                                            |
| Keywords:                       | BIOTECHNOLOGY & BIOINFORMATICS, Molecular diagnostics <<br>INFECTIOUS DISEASES, Public health < INFECTIOUS DISEASES,<br>Infection control < INFECTIOUS DISEASES                                                                                                                                                                                                                                                                                                                                                                                                                                                                                                                                                                                                                                                                                                                                                                   |
|                                 |                                                                                                                                                                                                                                                                                                                                                                                                                                                                                                                                                                                                                                                                                                                                                                                                                                                                                                                                   |

SCHOLARONE™  
Manuscripts



I, the Submitting Author has the right to grant and does grant on behalf of all authors of the Work (as defined in the below author licence), an exclusive licence and/or a non-exclusive licence for contributions from authors who are: i) UK Crown employees; ii) where BMJ has agreed a CC-BY licence shall apply, and/or iii) in accordance with the terms applicable for US Federal Government officers or employees acting as part of their official duties; on a worldwide, perpetual, irrevocable, royalty-free basis to BMJ Publishing Group Ltd ("BMJ") its licensees and where the relevant Journal is co-owned by BMJ to the co-owners of the Journal, to publish the Work in this journal and any other BMJ products and to exploit all rights, as set out in our [licence](#).

The Submitting Author accepts and understands that any supply made under these terms is made by BMJ to the Submitting Author unless you are acting as an employee on behalf of your employer or a postgraduate student of an affiliated institution which is paying any applicable article publishing charge ("APC") for Open Access articles. Where the Submitting Author wishes to make the Work available on an Open Access basis (and intends to pay the relevant APC), the terms of reuse of such Open Access shall be governed by a Creative Commons licence – details of these licences and which [Creative Commons](#) licence will apply to this Work are set out in our licence referred to above.

Other than as permitted in any relevant BMJ Author's Self Archiving Policies, I confirm this Work has not been accepted for publication elsewhere, is not being considered for publication elsewhere and does not duplicate material already published. I confirm all authors consent to publication of this Work and authorise the granting of this licence.



# Diagnostic accuracy of an app-guided, self-administered test for influenza among individuals presenting to general practice with influenza-like illness: Study protocol

**Corresponding Author:** Victoria Lyon. Department of Family Medicine, 4225 Roosevelt Way NE, 98105, Suite 309, Box 354696. University of Washington, Seattle, USA. Email: [vlyon@uw.edu](mailto:vlyon@uw.edu) Phone: 505-660-9500

## Full Author List:

Victoria Lyon, MPH<sup>1</sup>  
Monica Zigman Suchsland, MPH, PhD student<sup>1</sup>  
Monique Chilver, B.Sc. Mol. Biol, MPH, PhD student<sup>2</sup>  
Nigel Stocks, MD, BSc, MBBS, DipPH<sup>2</sup>  
Barry R. Lutz, PhD<sup>3</sup>  
Philip Su, B.Sc. <sup>5</sup>  
Shawna Cooper, BA<sup>5</sup>  
Chunjong Park, MS, PhD student<sup>4</sup>  
Libby Rose Lavitt, BA<sup>4</sup>  
Alex Mariakakis, PhD<sup>4</sup>  
Shwetak Patel, PhD<sup>4</sup>  
Chelsey Graham, MEng<sup>6</sup>  
Mark Rieder, PhD<sup>6</sup>  
Cynthia LeRouge, PhD<sup>7</sup>  
Matthew Thompson, MBChB, MPH, DPhil<sup>1</sup>

## Affiliations:

1. Department of Family Medicine, Box 354696, University of Washington, Seattle, USA
2. Discipline of General Practice, University of Adelaide, Australia.
3. Department of Bioengineering, Box 355061, University of Washington, Seattle, USA
4. Paul G Allen School of Computer Science and Engineering, University of Washington, Seattle, USA
5. Audere, 1191 2nd Ave, Suite 450, Seattle, WA 98104, USA
6. Brotman Bay Institute for Precision Medicine, University of Washington, Seattle, USA
7. Department of Information Systems and Business Analytics, Florida International University, Miami, USA

**Word Count: 4663**

**Keywords: Influenza, self-test, accuracy, ILI, ASPREN, RDT, rapid diagnostic, mobile app, smartphone, flu**

## ABSTRACT

**Introduction:** Diagnostic tests for influenza in Australia are currently only authorized for use in clinical settings. At-home diagnostic testing for influenza could reduce the need for patient contact with health care services, which potentially could contribute to symptomatic improvement and reduced spread of influenza. We aim to determine the accuracy of an app-guided nasal self-swab combined with a lateral flow immunoassay for influenza conducted by individuals with influenza-like illness (ILI).

**Methods and analysis:** Adults ( $\geq 18$  yr) presenting with ILI will be recruited by general practitioners (GP) participating in Australian Sentinel Practices Research Network (ASPREN). Eligible participants will have a nasal swab obtained by their GP for verification of influenza A/B status using RT-PCR at an accredited laboratory. Participants will receive an influenza test kit and will download an app that collects self-reported symptoms and influenza risk factors, then instructs them in obtaining a low-nasal self-swab, running a QuickVue influenza A+B lateral flow immunoassay (Quidel Corporation), and interpreting the results. Participants will also interpret an enhanced image of the test strip in the app. The primary outcome will be the accuracy of participants' test interpretation compared to the laboratory RT-PCR reference standard. Secondary analyses will include accuracy of the enhanced test strip image, accuracy of an automatic test strip reader algorithm, and validation of prediction rules for influenza based on self-reported symptoms. A post-test survey will be used to obtain participant feedback of self-test procedures.

**Ethics and dissemination:** The study was approved by the Human Research and Ethics Committee (HREC) at the University of Adelaide (H-2019-116). Protocol details and any amendments will be reported to <https://www.tga.gov.au/>. Results will be published in the peer reviewed literature, and shared with stakeholders in the primary care and diagnostics communities.

**Universal Trial Number (UTN):** U1111-1237-0688, registered on the Australia New Zealand Clinical Trial Registry:  
<https://www.anzctr.org.au/Trial/Registration/TrialReview.aspx?ACTRN=12619001087145>

## STRENGTHS AND LIMITATIONS OF THIS STUDY

- Accuracy of nasal self-testing for influenza using the QuickVue Influenza A+B assay will be compared to reference standard of nasal or nasopharyngeal swab obtained by a GP and tested using RT-PCR.
- Recruitment will be nested within an ongoing Australian Surveillance Practices Research Network recruiting patients presenting to general practice with influenza-like illness (ILI)

- Patients attending primary care with ILI may differ in terms of disease spectrum compared to individuals with ILI at home, which is the population where the self-test is intended to be used.
- Self-swabbing of the nose and conducting a lateral flow test unsupervised and guided by an app may select individuals with greater smartphone experience, manual dexterity, and/or sociodemographic status.
- Self-report of ILI symptoms using an app may differ from symptoms obtained from GP consultations or from research staff, limiting the ability to validate clinical prediction rules for influenza.
- The mobile app was validated in the United States, but was not adapted or validated for the Australian context.

## INTRODUCTION

Seasonal influenza occurs annually, causing disease with substantial morbidity and mortality worldwide, especially in the elderly and those with chronic disease.[1] Despite the availability of the influenza vaccine, repeated influenza infections are common throughout life, and result in a considerable healthcare burden. In Australia, it is estimated that each year influenza causes an average 310,000 general practitioner (GP) consultations, 18,000 hospital admissions, and 1,500 to 3000 deaths.[2-4] Influenza places particular burden on primary care services during the winter months, contributing to high consultation rates for acute respiratory tract infections. Detection of influenza is thought to provide value clinically by identifying patients who may be at higher risk of complications, and also to potentially inform use of antivirals and efforts to reduce transmission.[5]

GPs generally diagnose influenza based on a combination of symptoms and risk factors present in each patient, and diagnostic confirmation requires a laboratory test.[5] Multiple tests are available for influenza, including immunoassays and molecular tests with varying levels of sophistication and cost, that can be used in different clinical settings.[6] While some point-of-care tests are approved for, and suitable in primary care settings, others can only be conducted in formal laboratory facilities.

Because there is considerable overlap in symptoms caused by influenza and other respiratory pathogens, many patients who are tested for influenza receive flu-negative results. To reduce the number of unnecessary tests that are requested by GPs, clinical prediction rules have been derived to stratify individuals more accurately than individual symptoms into those with various likelihood of influenza infection.[7] Currently there are no diagnostic tests for influenza that are approved for use by individuals outside of clinical settings in Australia or the United States. The ability to accurately test individuals at home for influenza could provide several potential advantages over current practice. One advantage for patients would be convenience by reducing the need for primary care consultations. Home-testing may also facilitate the earlier use of antivirals when they are most likely to provide beneficial effects on symptom resolution and reduce transmission, and help identify individuals at higher risk of complications compared to those with other causes of influenza-like illness (ILI).[8]

1  
2  
3  
4  
5  
6 The primary aim of the current study is to determine the accuracy of a self-test for influenza that  
7 involves individuals self-swabbing their nose and conducting an immunoassay lateral flow test  
8 guided by a mobile app, compared to the gold standard RT-PCR influenza test obtained by their  
9 GP. Several studies have already demonstrated the feasibility of collecting patient-reported ILI  
10 symptoms.[9-13] This study expands on this field by leveraging smartphone mobile app to  
11 instruct participants through conducting a rapid diagnostic test (RDT). We also aimed to explore  
12 additional methods for reading the test strip, and validating existing clinical prediction rules for  
13 influenza.  
14  
15

## 16 17 18 **METHODS**

### 19 20 21 **Study Design**

22 A prospective observational study of the comparative accuracy of a patient-run, mobile app-  
23 guided (see Appendix A), lateral flow test for influenza (QuickVue Influenza A + B assay test,  
24 from Quidel Corporation) using a low nasal self-swab (referred to in this protocol as  
25 'flu@home'), compared to clinician-collected nasal or nasopharyngeal swab for influenza  
26 detected by a commercial RT-PCR. The Universal Trial Number (UTN) is U1111-1237-0688,  
27 registered on 6/08/2019. (See Figure 1).  
28  
29  
30

### 31 32 **Study population**

33 A systematic sample of adult patients with ILI presenting to general practices participating in the  
34 Australia Sentinel Practices Research Network (ASPREN), which is a network of over 350  
35 general providers from over 200 sentinel sites throughout Australia. GPs in the network  
36 participate in routine surveillance studies of respiratory infections by the Commonwealth. [14,15]  
37 (See Appendix B for ASPREN protocol).  
38  
39

### 40 41 **Inclusion and exclusion criteria**

42 Inclusion criteria are: 1) age  $\geq$  18 years, 2) presenting to ASPREN clinic sites [16] with fever,  
43 cough, and fatigue, 3) agree to have their GP/nurse practitioner obtain a nasal or  
44 nasopharyngeal swab for surveillance purposes, and 4) have their own Android or iOS  
45 smartphone or tablet. Exclusion criteria will be non-English speakers, people who are  
46 incarcerated, people highly dependent on medical care who may be unable to give consent, and  
47 people with a cognitive impairment, an intellectual disability or mental illness. We did not  
48 exclude people with physical disabilities or impaired vision, but rather left the decision to recruit  
49 a patient up to their GP at the time of their visit.  
50  
51

### 52 53 **Recruitment**

54 Each clinic will recruit any patient presenting with an ILI who is 18 years and older, has a  
55 smartphone and agrees to participate in the study.  
56  
57  
58  
59  
60

## Clinical setting

Study participants will be recruited from practices participating in ASPREN, which is a network of sentinel GPs who report de-identified information on ILI as well as other infectious disease conditions.[16] The de-identified information will include date of symptom onset, influenza vaccination history, comorbidities related to influenza, and whether the patient is a health care worker. Data from ASPREN are used by State and Commonwealth Departments of Health for infectious disease surveillance and vaccine effectiveness estimates.[17] ASPREN data contribute to the Global Influenza Vaccine Effectiveness Movement and the World Health Organization Collaborating Centre for Reference and Research on Influenza (WHO-CCRI).

## Outcome measurements

### Primary outcome

- Accuracy of detection of influenza A/B infection based on self-reading of the flu@home test compared to laboratory RT-PCR testing.

### Secondary outcomes

- Accuracy of detection of influenza A/B infection based on self-reading of an enhanced high contrast image of the flu@home test strip compared to laboratory RT-PCR testing.
- Accuracy of detection of influenza A/B infection based on the app's automatic interpretation algorithm of the flu@home test strip image compared to laboratory PCR testing.
- Accuracy of clinical prediction rules including the Flu Score [7] based on individual and combinations of presenting symptoms obtained from the app and/or the patient's GP compared to laboratory PCR testing.
- Satisfaction and experience of patients interacting with the flu@home app.

### Other variables

The app will collect information on demographics (age, sex, race), household composition, influenza vaccination history, risk factors for influenza infection, presence and duration of ILI symptoms (e.g., cough, fever, fatigue, chills or sweats), (see Appendix C). These variables will be used to facilitate interpretation of test results in terms of these various participant characteristics.

## Study procedures

Patients who participate in the ASPREN study will be invited to participate in the flu@home self-testing study from July 2019 until all 2300 kits are distributed, no later than December 2020. Each participating GP will be provided with a set number of test kits, based on the numbers of ILI patients encountered in previous flu seasons, and the number of ILI patients swabbed during the current 2019 flu season. Participating GPs will be asked to recruit all patients who meet study eligibility criteria. After completing the standard ASPREN protocol (see Appendix B), a GP will ask the participant if they would like to participate in the flu@home study. Once the participant consents, the GP will hand them the test kit and instructions for downloading the free app, and the patient will be asked to conduct the remainder of the study procedures at home on that day or the following day. A post-test survey will be sent to participants via the app 24-48 after they complete the test procedure.

## Influenza testing methods

### Home/self-testing

Patients will be provided with a self-test kit by their GP containing a Quidel QuickVue Influenza A+B lateral flow test (rebranded as the flu@home kit for research purposes), and asked to download the free flu@home app [18] to their personal iOS or Android smartphone or tablet. Each test kit includes a unique 8-digit study ID number that will be linked to reference test results, but cannot be used to personally identify participants. The app collects the variables noted above through a questionnaire, and guides the patient through the self-swabbing and testing procedure. They will be instructed to obtain a low nasal swab using a single foam-tipped swab inserted into each nostril, and then perform the steps to conduct the lateral flow test.

Having completed the test steps, the app guides the patient to read their test strip by first asking them whether they see a blue line (control line) and any pink lines (1<sup>st</sup> interpretation). A pink line above the blue line indicates influenza A, and a pink line below the blue control line indicates influenza B. If the patient indicates they do not see the blue control line, they are informed that they have a defective test strip and interpretation guidance is not provided. For patients who indicate they see a blue control line, the app guides the patient to obtain a photo of their test strip using their smartphone camera. During this process the app provides a guided test strip image capture, including on-screen feedback to the participant to ensure proper alignment, lighting, positioning, scale, and rotation of the test strip prior to taking a photo. Once a photo of the strip is captured, the user is presented with a high-contrast image of their test strip and asked to reinterpret the test results by indicating how many lines they now see on the strip (2<sup>nd</sup> interpretation). Presenting a high-contrast image to the patient may help them see lines on the test strip that may have previously been too faint to easily identify. Initially, the app uses the patient's direct observation of the strip to inform the patient whether it is likely their test result was positive for influenza. During the study we may adjust this process to inform the patient of their likely test result based on auto-interpretation of the images captured.

While the test strip differentiates between influenza A and B, we will not ask individuals to make this determination. If the guided test strip image capture is not successful, the app requests the patient to manually take a normal photo of their test strip using their smartphone for later analysis. The app uses the patient's observations to inform the patient of their likely test result.

Patients will be given links to publicly-available information on influenza from healthdirect [19] and provided with usual care recommendations in the app depending on their test results (from either the 1<sup>st</sup> or 2<sup>nd</sup> interpretation). The app includes a medical disclaimer indicating "The interpretation of your result may differ from a medical test conducted in a clinical lab environment. In no circumstances should the results of this test be relied upon without independent consideration and confirmation by a qualified medical practitioner." [20] Patients will be notified of the results of the reference test by their GP, who will provide standard care based on the RT-PCR results. Study materials will clearly indicate that the flu@home test is an experimental research test, and participants should trust the reference test results provided by their GP. Participants whose flu@home results are discordant with those of their GP will be

1  
2  
3 asked to contact their GP for any clinical management decisions or changes that their GP would  
4 recommend.  
5

### 6 7 Reference testing

8 Influenza and other respiratory pathogens will be detected using RT-PCR on the swabs  
9 obtained by the GP at ASPREN clinical sites. (See Appendix B for list of pathogens tested).  
10 Samples will be sent to SA Pathology in Adelaide, South Australia, via Australia Post's Express  
11 post system, allowing for next-day delivery from all capital cities.[21] Results of the laboratory  
12 PCR test, home self-test kit, and survey data from the app will be linked by the 8-digit number  
13 available on the test kit and PCR sample.  
14  
15

### 16 17 Post-test survey

18 A link to a reflective online survey created in Qualtrics© will be delivered to participants who  
19 complete the test procedure. The request to complete the survey will be delivered via  
20 participants' smartphone or tablet 24-48 hours after completing their self-test. The survey will  
21 solicit responses regarding the respondent's a) health behaviors and attitudes, b) perceptions of  
22 their experience and usability of the self-test impact, c) perceived value of self-testing, and d)  
23 intention to act on self-test results. Survey items will be close-ended and, generally, call for a  
24 response to a five-point Likert scale with anchors ranging from strongly agree to strongly  
25 disagree (see Appendix D for follow-up survey items categorized by construct, i.e., focal topic).  
26  
27

### 28 29 Participant discontinuation

30 Individuals who start the app, provide consent, but fail to complete all steps of the test  
31 procedure will be excluded from the primary comparative accuracy analysis. If any participants  
32 who were swabbed by their GP as part of ASPREN surveillance test positive for flu, they will be  
33 contacted by their general practice clinic to discuss further clinical management; this will not be  
34 affected by failure to complete the flu@home procedure.  
35  
36

### 37 38 **Data analysis**

39 We will conduct a descriptive analysis of demographics, presenting symptoms, and baseline  
40 variables such as household composition, vaccination status, and general health questions.  
41 Prevalence of influenza will be obtained from positivity rate of PCR laboratory testing.  
42 Sensitivity, specificity, positive and negative predictive values (with 95% confidence intervals)  
43 will be calculated for the presence of influenza based on patient interpretation of self-test results  
44 compared to the reference standard PCR result. Accuracy will also be calculated for  
45 participants' interpretation of the enhanced high-contrast photo of the test strip, as well as the  
46 automatic test strip interpretation algorithm, compared to the reference standard PCR result. We  
47 will also measure the accuracy of clinical prediction rules based on individual and combinations  
48 of ILI symptoms based on Flu Score [7] and other prediction rules, compared to the reference  
49 standard PCR result. Subgroup analyses will explore test accuracy based on age, symptom  
50 profile, duration of illness, and influenza type (A/B).  
51  
52

53  
54 We will conduct a descriptive analysis of post-test survey results related to demographics,  
55 health behaviors and attitudes, experience and usability of the self-test, impact and perceived  
56  
57  
58  
59

1  
2  
3 value of self-testing, and intention to act on self-test results. In addition, we will conduct  
4 Multivariate Analysis of Variance (MANOVA) to determine if statistically significant differences  
5 exist among various subpopulations (e.g., age group, gender) regarding their responses to  
6 survey items related to variables associated with experience and usability of the self-test and  
7 impact and perceived value of self-testing. MANOVA analysis permits simultaneous testing of  
8 the variables associated with one construct, e.g., experience and usability of the self-test,  
9 simultaneously to arrive at a holistic assessment and recognizes the potential correlation related  
10 to these variables. Analysis of Variance (ANOVA) will be used to determine if statistically  
11 significant differences exist among the responses from various subpopulations (e.g., age group,  
12 gender) to survey items related to intention to act on self-test results. We will also use Partial  
13 Least Squares Regression (PLS) to construct predictive models to assess relationships among  
14 demographics, health behaviors and attitudes, experience and usability of the self-test, impact  
15 and perceived value of self-testing, and intention to act on self-test results.  
16  
17  
18  
19

### 20 **Sample size calculation**

21 The sample size required for this study was determined based on i) expected completion rate of  
22 the home test kit, ii) flu positivity rate, iii) availability of test kit materials, and iv) number of flu-  
23 positive test results which are typically provided in FDA submissions for regulatory approval of  
24 rapid flu diagnostic tests. To our knowledge, there have been no other comparative accuracy  
25 studies of a smartphone-enabled respiratory illness diagnostic test conducted in Australia.  
26 Therefore, the expected completion rate of the home testing procedure is based on a USA-  
27 based pilot study that found that 60% of individuals completed the flu@home test kit when it  
28 was mailed to them. In the current study, we expect a higher completion rate given that  
29 participants will be recruited by their GP rather than online. The flu positivity rate among patients  
30 presenting with ILI to ASPREN clinics is based on data from previous years, which indicated a  
31 20% positivity rate among recruited adults (of all ages) in the July – December period.  
32 Assuming that 60% of the 2300 self-test kits distributed to GPs are completed (1380), we expect  
33 20% (276) to be influenza positive. This absolute number of flu positive specimens exceeds that  
34 required by FDA in regulatory submissions to evaluate the accuracy of new tests designed for  
35 clinical settings, which is typically 120.[22] There are not currently any recommendations for  
36 sample sizes needed for evaluation of the accuracy of home-based tests for influenza.  
37  
38  
39  
40  
41

### 42 **Patient and Public involvement**

43 The flu@home app has undergone several iterations of usability and user acceptance testing  
44 with a diverse population in the United States. This included usability testing conducted during a  
45 pilot phase in the USA using an independent user research firm, which provided input on app  
46 usability, time to conduct questionnaire, and the appearance and design of the app. There has  
47 not been any prior testing of the app in Australia, however, the research study members from  
48 Australia reviewed the app prior to launch to ensure the language in the app was appropriate for  
49 the Australian context.  
50  
51  
52

### 53 **Ethics and dissemination**

54 The study procedures will follow Australian clinical and ethical standards as outlined by the  
55 University of Adelaide Human Research Ethics Committee (HREC). All activities will follow the  
56  
57  
58  
59



1  
2  
3 Code of Good Practice in Clinical Research. Participants will provide informed consent for the  
4 flu@home study within the app that is downloaded. The study was approved by the Human  
5 Research and Ethics Committee at the University of Adelaide (HREC Number: H-2019-116).  
6 The authors will seek approval for any protocol modifications, which will also be reported to the  
7 clinical trials registration site. Results of this study will be reported using the STARD guidelines  
8 for reporting diagnostic accuracy studies, and published in the peer-reviewed scientific  
9 literature.[23]  
10  
11

### 12 **Confidentiality and data management**

13 All study data collected are non-identifiable. No participant names, addresses, or private  
14 information are collected for the purposes of the study. Samples from the ASPREN survey and  
15 app data are linked via a unique barcode. The researchers cannot link the barcode to  
16 identifiable patient details such as name, address, or other private information. ASPREN  
17 surveillance data will be stored on University of Adelaide computers, which can only be  
18 accessed by authorized representatives. All data will be non-identifiable. All data collected by  
19 the flu@home app will be protected with industry-standard encryption on systems hosted  
20 through Amazon Web Services and the Google Cloud Platform, which are only accessible by  
21 authorized representatives of the app development organization, Audere. Audere is a non-profit  
22 application development organization that runs the flu@home application. During data analysis  
23 non-identifiable data will be transferred to a University of Washington approved data storage  
24 location, which is only accessible to authorized parties, and the University of Adelaide drives for  
25 analysis. Further information about confidentiality and data management in the mobile app can  
26 be found in Appendix A.  
27  
28  
29  
30  
31

## 32 **DISCUSSION**

33  
34 Influenza is a common infection that occurs annually in the southern and northern hemispheres.  
35 Consultations for respiratory tract illnesses are one of the most common reasons for  
36 presentation in primary care settings in Australia and most other high- and middle-income  
37 countries.(2) In Australia influenza season occurs between the months of May to October.[24]  
38 Differentiating etiology of respiratory tract infection based on symptoms alone is limited, and  
39 current confirmatory diagnosis of respiratory pathogens involves laboratory testing.[22]  
40 Diagnostic tests for influenza are commonly used in laboratory settings, and in many countries  
41 are used in primary care or pharmacy settings.[25–27] Regulatory approval varies between  
42 countries, but typically tests approved for primary care involve simple point of care assays that  
43 do not require laboratory technician expertise.  
44  
45  
46

47 We will use an existing rapid diagnostic test for influenza A and B that has been approved  
48 in the United States for use in primary care clinics since 2004 (QuickVue Influenza A + B assay  
49 test, from Quidel Corporation)[28]. This test has adequate performance as demonstrated by  
50 regulatory approval in the US, with a 2017-18 clinical study comparing this test to an FDA  
51 cleared A+B molecular test, showing sensitivity of 94% for Type A and 70% for Type B, and  
52 specificity of 90% for Type A and 97% for Type B[29,30]. However, we note that additional  
53 evaluations of this test (and similar lateral flow tests) for influenza show lower test accuracy in  
54 further clinical evaluations. A 2017 meta-analysis of 162 studies of rapid tests for influenza  
55  
56  
57  
58  
59

1  
2  
3 found noted that the pooled sensitivity of such tests favored industry-sponsored studies by 6.2  
4 to 34.0%. [31]  
5

6  
7 The potential for individuals to test themselves for influenza follows a pathway for home-based  
8 testing that has revolutionized pregnancy testing with commonly available lateral flow assays,  
9 glucose testing using home-based monitors, as well as electronic devices for measuring blood  
10 pressure. While there is strong evidence that individuals are able to obtain swabs themselves  
11 from the nose or throat [32–34], there is no evidence currently for the accuracy of individuals  
12 performing a diagnostic test on self-obtained samples for influenza.  
13

14  
15 The potential value of a self-test for influenza could lead to changes in practice and behavior,  
16 assuming the test has sufficient accuracy. For individuals in the community, this could lead to  
17 faster diagnosis, improved access to diagnostic testing, improved diagnostic certainty, and  
18 reduced need to contact health care services. For primary health care services, it could reduce  
19 the burden of consultations for ILI and facilitate more rapid or targeted use of antivirals if these  
20 can be prescribed remotely (by telephone, or telemedicine consultations). In terms of public  
21 health, self-testing could also influence infection control and transmission reduction strategies at  
22 the community level. Combining a diagnostic test with a smartphone where the user's steps are  
23 process-controlled (e.g. embedded timers ensure the patient adheres to the test procedure)  
24 may both facilitate support for the user, and potentially allow enhanced interpretation of test  
25 results using the existing camera and software found in current devices. A downside to  
26 home/self-based testing for influenza is that easier access to testing could lead to the diagnosis  
27 of mild cases of influenza where antiviral treatment is not indicated. Increased access to self-  
28 testing include has financial implications including added costs to individuals who might have to  
29 purchase the tests, and to the healthcare system that might need to interpret, repeat or act on  
30 test results. Inaccurate tests could further cause harm through false negative and/or false  
31 positive results.  
32  
33  
34  
35

## 36 37 **LIMITATIONS OF STUDY**

38 The study has several potential limitations. First, recruitment of participants will not be entirely  
39 consecutive, although this follows the procedures that the participating clinics use for ongoing  
40 surveillance activities. Limiting this study to general practices means that some patients with ILI  
41 are excluded, such as those attending hospitals and emergency departments, receiving medical  
42 care from locum doctors or not seeking any medical treatment for ILI. Second, the spectrum of  
43 individuals presenting with ILI to GPs may be different to that expected in the community, with  
44 higher influenza prevalence, more severe symptoms, and/or longer time since onset of infection.  
45 The time point at which individuals present to their GP with influenza may have a critical impact  
46 on test sensitivity, as there is strong evidence that the sensitivity of rapid antigen influenza tests  
47 declines markedly beyond the initial 48-72 hours of illness.[35,36] Third, the performance of the  
48 nasal swab, and conduct of the lateral flow test is unsupervised, and therefore we will not be  
49 able to determine the impact of these factors on test accuracy. There is robust evidence that  
50 individuals are able to collect mid turbinate and low nasal swabs with similar performance to  
51 health care professionals for influenza, but we will not be able to further verify this in the current  
52 study. [37] Fourth, conduct of the test may vary with participant characteristics, such as age or  
53  
54  
55  
56  
57  
58  
59

1  
2  
3 limitations in ability to handle smartphones, and their ability to visualize lines on the test strip.  
4 We will explore these using subgroup analyses (based on age), and user feedback from follow  
5 up surveys. Fifth, differences in interpretation of the enhanced image may depend on the  
6 technical capabilities of individuals' smartphones. Sixth, we are aware that the flu@home app  
7 has not been validated in this population and setting, and may need additional validation before  
8 being implemented or being used with a commercial device. Finally, while we do ask study  
9 participants about multiple aspects of their experience with the home-based influenza test, we  
10 will not ask specifically about their feelings regarding testing positive for influenza using a home-  
11 based test. Understanding the emotional impact of receiving a positive result using a self-test is  
12 out of scope for this study. Additionally, we will not be able to evaluate comparative costs of the  
13 flu@home test compared to usual care within this study.  
14  
15  
16  
17  
18

## 19 **FUNDING**

20 The Australian Sentinel Practices Research Network is supported by the Australian Government  
21 Department of Health (the Department). The opinions expressed in this paper are those of the  
22 authors, and do not necessarily represent the views of the Department.

23 The flu@home study is funded by Audere and Gates Ventures through the Brotman Baty  
24 Institute at the University of Washington. The funding reference number is UA194099 (in the  
25 University of Adelaide database). The study was conducted in association with the University of  
26 Adelaide in Australia, and the University of Washington in the United States. QuickVue  
27 Influenza A+B test kit supplies were donated by Quidel Corporation. Gates Ventures and Quidel  
28 Corporation were not involved in the design of the study, does not have any ownership over the  
29 management and conduct of the study, the data, or the rights to publish.  
30  
31  
32

## 33 **ACKNOWLEDGEMENTS**

34 We acknowledge the support of the Seattle Flu Study Research Team, the participating clinics  
35 in the Australia Sentinel Practices Research Network (ASPREN), and John Tamerius from  
36 Quidel Corporation for providing the QuickVue Influenza A+B test kit supplies.  
37  
38  
39  
40

## 41 **Figure Legend**

42 Figure 1. flu@home Australia study procedure  
43  
44  
45  
46  
47  
48  
49  
50  
51  
52  
53  
54  
55  
56  
57  
58  
59  
60

## Contributorship statement

All persons who meet authorship criteria are listed as authors, and all authors certify that they have participated sufficiently in the work to take public responsibility for the content, including participation in the concept, design, analysis, writing, or revision of the manuscript. Additionally, each author certifies that this material or similar material has not been and will not be submitted to publication before its appearance in BMJ Open.

**Conception or design of the work:** Victoria Lyon, Monica Zigman Suchsland, Monique Chilver, Nigel Stocks, Barry Lutz, Shawna Cooper, Cynthia LeRouge, Matthew Thompson

**flu@home end-to-end app development and technical support:** Shawna Cooper, Philip Su,

**Image capture and interpretation feature development:** Libby Rose Lavitt, Chunjong Park, Alex Mariakakis, Shwetak Patel

**Managed ASPREN network communication and GP recruitment:** Monique Chilver, Nigel Stocks

**Managed logistics of funding, obtaining and shipping test kits:** Chelsey Graham, Mark Rieder

**Follow-up survey design:** Cynthia LeRouge, Victoria Lyon

**Drafting the article:** Victoria Lyon, Monica Zigman Suchland, Barry Lutz, Shawna Cooper, Matthew Thompson

**Critical revision of the article:** Victoria Lyon, Monica Zigman Suchland, Matthew Thompson

**Final approval of the version to be published:** Victoria Lyon, Monica Zigman Suchsland, Monique Chilver, Nigel Stocks, Barry R. Lutz, Philip Su, Shawna Cooper, Chunjong Park, Libby Rose Lavitt, Alex Mariakakis, Shwetak Patel, Chelsey Graham, Mark Rieder, Cynthia LeRouge, Matthew Thompson

Guarantors: Barry Lutz, Matthew Thompson

## Competing Interests

The authors do not have any competing interests.

## References

1. Call to Action: The Dangers of Influenza and Benefits of Vaccination in Adults with Chronic Health Conditions [Internet]. National Foundation for Infectious Diseases; 2018 Sep p. 1–19. Available from: <http://www.nfid.org/idinfo/influenza/cta-dangers-of-influenza-in-adults-with-chronic-health-c.pdf>
2. Newall AT, Scuffham PA, Hodgkinson B. Economic Report into the Cost of Influenza to the Australian Health System; Report to the Influenza Specialist Group [Internet]. 2007 Mar p. 1–19. Available from: <http://www.isg.org.au/assets/Uploads/ISG-Cost-of-Influenza/isg-cost-influenza-report-30-2007.pdf>
3. Healthdirect Australia. Colds and flu statistics [Internet]. 2019 [cited 2019 Jul 26]. Available from: <https://www.healthdirect.gov.au/colds-and-flu-statistics>
4. Influenza Fast Facts [Internet]. Influenza Specialist Group (ISG). 2020 [cited 2020 Jun 15]. Available from: <http://www.isg.org.au/index.php/clinical-information/influenza-fast-facts/>
5. Influenza Signs and Symptoms and the Role of Laboratory Diagnostics | CDC [Internet]. 2019 [cited 2019 Jul 29]. Available from: <https://www.cdc.gov/flu/professionals/diagnosis/labrolesprocedures.htm>
6. Overview of Influenza Testing Methods | CDC [Internet]. 2019 [cited 2019 Jul 26]. Available from: <https://www.cdc.gov/flu/professionals/diagnosis/overview-testing-methods.htm>
7. van Vugt SF, Broekhuizen BD, Zuithoff NP, van Essen GA, Ebell MH, Coenen S, et al. Validity of a clinical model to predict influenza in patients presenting with symptoms of lower respiratory tract infection in primary care. *Fam Pract*. 2015 Aug;32(4):408–14.
8. Lindstrom S PhD. Public Health Perspective on Potential Benefits and Risks of OTC Influenza Diagnostics [Internet]. Influenza Division, Centers for Disease Control and Prevention; 2016 Aug. Available from: <https://www.fda.gov/media/99888/download>
9. Lwin MO, Yung CF, Yap P, Jayasundar K, Sheldenkar A, Subasinghe K, et al. FluMob: Enabling Surveillance of Acute Respiratory Infections in Health-care Workers via Mobile Phones. *Front Public Health* [Internet]. 2017 Mar 17 [cited 2020 Jun 12]; Available from: [http://link.gale.com/apps/doc/A485889167/AONE?u=wash\\_main&sid=zotero&xid=f1069818](http://link.gale.com/apps/doc/A485889167/AONE?u=wash_main&sid=zotero&xid=f1069818)
10. Hsuen Y, Brownstein JS, Liu J, Hawkins JB. Use of a Digital Health Application for Influenza Surveillance in China. *Am J Public Health*. 2017 May 18;107(7):1130–6.

11. Kim M, Yune S, Chang S, Jung Y, Sa SO, Han HW. The Fever Coach Mobile App for Participatory Influenza Surveillance in Children: Usability Study. *JMIR MHealth UHealth* [Internet]. 2019 Oct 17 [cited 2020 Jun 12];7(10). Available from: <https://www.ncbi.nlm.nih.gov/pmc/articles/PMC6823603/>
12. Smolinski MS, Crawley AW, Baltrusaitis K, Chunara R, Olsen JM, Wójcik O, et al. Flu Near You: Crowdsourced Symptom Reporting Spanning 2 Influenza Seasons. *Am J Public Health*. 2015 Oct;105(10):2124–30.
13. Dalton C, Carlson S, Butler M, Cassano D, Clarke S, Fejsa J, et al. Insights From Flutracking: Thirteen Tips to Growing a Web-Based Participatory Surveillance System. *JMIR Public Health Surveill*. 2017 Aug 17;3(3):e48.
14. Parrella A, Dalton C, Pearce R, Litt J, Stocks N. ASPREN surveillance system for influenza-like illness A comparison with FluTracking and the National Notifiable Diseases Surveillance System. *Aust Fam Physician*. 2009 Nov 1;38:932–6.
15. Varghese BM, Dent E, Chilver M, Cameron S, Stocks NP. Epidemiology of viral respiratory infections in Australian working-age adults (20–64 years): 2010–2013. *Epidemiol Infect*. 2018 Apr;146(5):619–26.
16. Aspren Mission [Internet]. ASPREN. [cited 2019 Jul 26]. Available from: <http://www.aspren.com.au/MissionAndVision.html>
17. Sullivan SG, Chilver MB, Carville KS, Deng Y-M, Grant KA, Higgins G, et al. Low interim influenza vaccine effectiveness, Australia, 1 May to 24 September 2017. *Euro Surveill Bull Eur Sur Mal Transm Eur Commun Dis Bull*. 2017 Oct;22(43).
18. flu@home Australia Research Study [Internet]. flu@home Australia Research Study. [cited 2019 Jul 26]. Available from: <http://fluathome.org.au>
19. healthdirect: Free Australian health advice you can count on [Internet]. healthdirect. 2018 [cited 2019 Aug 21]. Available from: <https://www.healthdirect.gov.au/>
20. flu@home Mobile App. Audere; 2020.
21. Influenza vaccine effectiveness in Australia: results from the Australian Sentinel Practices Research Network | The Medical Journal of Australia [Internet]. [cited 2019 Jul 29]. Available from: <https://www.mja.com.au/journal/2014/201/2/influenza-vaccine-effectiveness-australia-results-australian-sentinel-practices>
22. Recommendations for Clinical Laboratory Improvement Amendments of 1988 (CLIA) Waiver Applications for Manufacturers of In Vitro Diagnostic Devices - Guidance for Industry and Food and Drug Administration Staff [Internet]. U.S. Food & Drug Administration. 2008 [cited 2019 Jul 29]. Available from: <https://www.fda.gov/regulatory-information/search-fda-guidance-documents/recommendations-clinical-laboratory-improvement-amendments-1988-clia-waiver-applications>

23. Cohen JF, Korevaar DA, Altman DG, Bruns DE, Gatsonis CA, Hooft L, et al. STARD 2015 guidelines for reporting diagnostic accuracy studies: explanation and elaboration. *BMJ Open*. 2016 Nov 1;6(11):e012799.
24. Tay EL, Grant K, Kirk M, Mounts A, Kelly H. Exploring a Proposed WHO Method to Determine Thresholds for Seasonal Influenza Surveillance. *PLOS ONE*. 2013 Oct 11;8(10):e77244.
25. World Health Organization. WHO Interim Global Epidemiological Surveillance Standards for Influenza [Internet]. 2012 [cited 2019 Jul 29]. Available from: <https://www.who.int/influenza/resources/documents/INFSURVMANUAL.pdf>
26. Montalto NJ. An Office-Based Approach to Influenza: Clinical Diagnosis and Laboratory Testing. *Am Fam Physician*. 2003 Jan 1;67(1):111–8.
27. Koski RR, Klepser ME. A systematic review of rapid diagnostic tests for influenza: considerations for the community pharmacist. *J Am Pharm Assoc*. 2017 Jan 1;57(1):13–9.
28. FDA Grants CLIA-Waived Status to Quidel's QuickVue Influenza A+B Test [Internet]. Businesswire. 2004 [cited 2020 May 27]. Available from: <https://www.businesswire.com/news/home/20040225005146/en/FDA-Grants-CLIA-Waived-Status-Quidels-QuickVue-Influenza>
29. QuickVue Influenza A+B Test - CLIA Complexity: WAIVED [package insert] [Internet]. Quidel Corporation; [cited 2020 May 27]. Available from: <https://www.quidel.com/immunoassays/rapid-influenza-tests/quickvue-influenza-test>
30. Influenza A+B Test - Frequently Asked Questions [Internet]. Quidel Corporation; 2018 [cited 2020 May 27]. Available from: <https://www.quidel.com/immunoassays/rapid-influenza-tests/quickvue-influenza-test>
31. Merckx J, Wali R, Schiller I, Caya C, Gore GC, Chartrand C, et al. Diagnostic Accuracy of Novel and Traditional Rapid Tests for Influenza Infection Compared With Reverse Transcriptase Polymerase Chain Reaction: A Systematic Review and Meta-analysis. *Ann Intern Med*. 2017 Sep 19;167(6):394–409.
32. Murray MA, Schulz LA, Furst JW, Homme JH, Jenkins SM, Uhl JR, et al. Equal performance of self-collected and health care worker-collected pharyngeal swabs for group a streptococcus testing by PCR. *J Clin Microbiol*. 2015 Feb;53(2):573–8.
33. Akmatov MK, Gatzemeier A, Schughart K, Pessler F. Equivalence of Self- and Staff-Collected Nasal Swabs for the Detection of Viral Respiratory Pathogens. *PLoS ONE* [Internet]. 2012 Nov 14 [cited 2019 Jul 29];7(11). Available from: <https://journals.plos.org/plosone/article?id=10.1371/journal.pone.0048508>

- 1  
2  
3 34. Wenham C, Gray ER, Keane CE, Donati M, Paolotti D, Pebody R, et al. Self-  
4 Swabbing for Virological Confirmation of Influenza-Like Illness Among an Internet-  
5 Based Cohort in the UK During the 2014-2015 Flu Season: Pilot Study. *J Med*  
6 *Internet Res.* 2018 01;20(3):e71.  
7  
8  
9 35. Green DA, StGeorge K. Rapid Antigen Tests for Influenza: Rationale and  
10 Significance of the FDA Reclassification. Kraft CS, editor. *J Clin Microbiol.* 2018  
11 Oct 1;56(10):e00711-18.  
12  
13 36. Chartrand C, Leeflang MMG, Minion J, Brewer T, Pai M. Accuracy of Rapid  
14 Influenza Diagnostic Tests: A Meta-analysis. *Ann Intern Med.* 2012 Apr  
15 3;156(7):500–11.  
16  
17 37. Seaman CP, Tran LTT, Cowling BJ, Sullivan SG. Self-collected compared with  
18 professional-collected swabbing in the diagnosis of influenza in symptomatic  
19 individuals: A meta-analysis and assessment of validity. *J Clin Virol Off Publ Pan*  
20 *Am Soc Clin Virol.* 2019;118:28–35.  
21  
22  
23  
24  
25  
26  
27  
28  
29  
30  
31  
32  
33  
34  
35  
36  
37  
38  
39  
40  
41  
42  
43  
44  
45  
46  
47  
48  
49  
50  
51  
52  
53  
54  
55  
56  
57  
58  
59  
60



1  
2  
3  
4  
5  
6  
7  
8  
9  
10  
11  
12  
13  
14  
15  
16  
17  
18  
19  
20  
21  
22  
23  
24  
25  
26  
27  
28  
29  
30  
31  
32  
33  
34  
35  
36  
37  
38  
39  
40  
41  
42  
43  
44  
45  
46  
47  
48  
49  
50  
51  
52  
53  
54  
55  
56  
57  
58  
59  
60

flu@home Australia study procedure

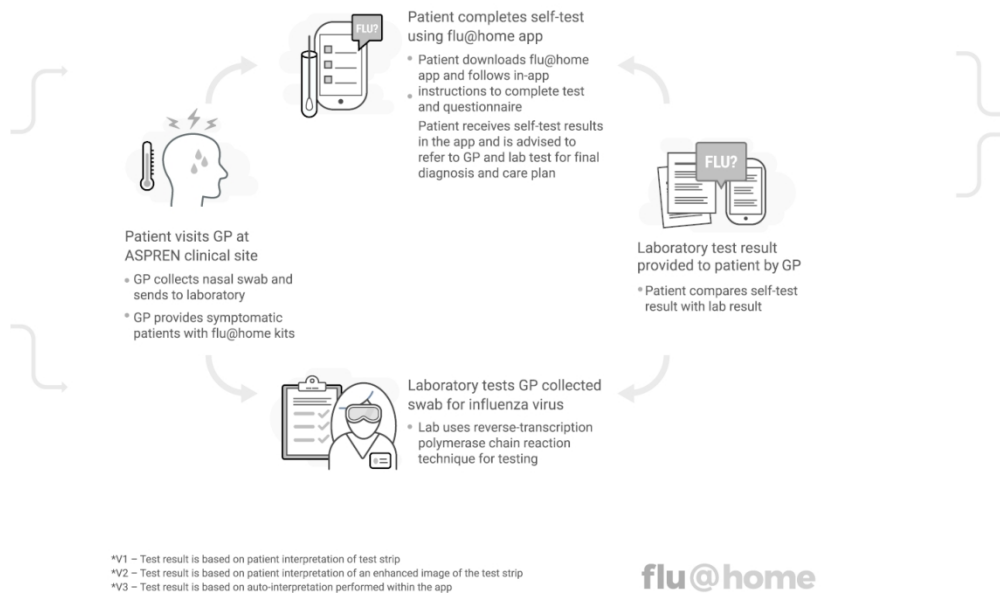

Figure 1  
flu@home Australia study procedure

121x81mm (300 x 300 DPI)

## APPENDIX

### Appendix A: App design and operation

The flu@home app can be used on an iPhone, iPad, Android smartphone, or Android tablet. The app is available in English for the study. However, the app supports development and release of other languages as needed. The entire app experience uses a touch-sensitive dynamic interface on the device. The app ensures the proper test procedure is followed through clear instructions and timers that prevent the participant from moving forward in the test process (e.g., when the test strip must remain in the test fluid for ten minutes to be certain the strip has enough time to process before reading the result). The app attempts to keep participants engaged during wait times by providing flu-related informational facts (during an initial one-minute timer when the nasal swab is processing in the RDT vial) and asking the participant to answer a set of demographic and illness-related survey questions (during the ten-minute timer). Field-level validation is employed to ensure participants answer specific required questions in the survey.

The app was built using React Native, a JavaScript framework used to create mobile applications for iOS and Android. The app communicates with the Google Cloud Platform (Firebase) to queue survey data and Firebase storage to queue images captured from the RDT flow. These are pulled by a NodeJS service into a PostgreSQL database hosted on an AWS Relational Database Service (RDS), which allows for operation and scale of a relational database in the cloud.

The flu@home Australia app is available for personal devices which are expected to be under control of an individual who uses a passcode to access the device. All supported devices use encryption to protect app data resident on the device. This encryption is afforded by the device itself, not a specific application. In the event that a device is stolen, the device's onboard locking feature is the front-line defense against access to data on the device. The flu@home application does not collect the user's name, email, or other key identifiable information in the app. It focuses on data collection of symptoms, disease presentation, and demographics. The level of data protection offered by the flu@home app is the same level of protection afforded to most other health applications, email, messaging, etc. available on a mobile device.

App data is stored in Amazon Web Services (AWS S3 and AWS RDS). Amazon Simple Store Service (S3) provides a straightforward web services interface that is used to store and retrieve data, such as PCR data from the swab taken as part of the ASPREN study and used for comparison to the RDT test results. Access to S3 requires user authentication. From the time data leaves the client, all data is encrypted both at rest and over communication links. We use AWS Key Management Service (KMS) to encrypt data at rest in AWS, and Google Cloud Platform automatically encrypts its data using Advanced Encryption Standard (AES). All connections to the app occur over Secure Sockets Layer (SSL), a standard security technology that establishes an encrypted link between a web server and browser, ensuring all data traversing the web server and browser remains private.

1  
2  
3  
4  
5  
6 For near real-time reporting, Metabase is run in an Elastic Container Service (ECS) in the same  
7 AWS project referencing the same app data.  
8

9 The app uses Firebase caching and analytics to track each participant page view, including a  
10 timestamp for each page view. Firebase is also used to track changed answers if a participant  
11 navigates back in the app flow.  
12  
13  
14  
15  
16  
17  
18  
19  
20  
21  
22  
23  
24  
25  
26  
27  
28  
29  
30  
31  
32  
33  
34  
35  
36  
37  
38  
39  
40  
41  
42  
43  
44  
45  
46  
47  
48  
49  
50  
51  
52  
53  
54  
55  
56  
57  
58  
59  
60

## Appendix B: Australia Sentinel Practices Research Network (ASPREN) Protocol

The protocol for ASPREN clinical sites requires GPs to sample the first three ILI patients each week during flu season (May – October 2019 inclusive), and the first ILI patient of the week from November 2019– April 2020 inclusive. For the flu@home study, GPs will be allowed to recruit all adult patients presenting to the clinic with ILI symptoms, in order to meet recruitment goals. Participating clinical sites will obtain a nasal or nasopharyngeal swab which will be transported to SA Pathology, Adelaide, South Australia for testing using RT-PCR for influenza A, influenza B, as well as RSV, enterovirus, adenovirus, mycopneumoniae, human metapneumovirus, parainfluenza 1, 2, 3 and pertussis. Samples positive for influenza A will be further subtyped. All original clinical samples testing positive for influenza will be referred to the WHO-CCRR (Melbourne, Australia) for antigenic and phylogenetic characterization. For clinical sites in tropical regions, due to the decreased seasonality of influenza, the systematic sample involves the first three ILI patients of each week, all year round. In addition to this, in all sites all ILI patients ages 65 years and over are tested all year round.

## Appendix C: Flu@home Participant Questionnaire

### Symptom Survey

Questions marked with an \* are required.

| Symptom                       | *Which of the following were present during your illness? | *How long ago did symptoms start?<br>(Select the time frame that best applies) | *Were these symptoms present in the last 48 hours? | *How severe were your symptoms?<br>(Select the level of discomfort you felt at the worst point) |
|-------------------------------|-----------------------------------------------------------|--------------------------------------------------------------------------------|----------------------------------------------------|-------------------------------------------------------------------------------------------------|
| Fever                         | YES/NO                                                    | 1 day, 2 days, 3 days, 4+ days                                                 | YES/NO                                             | mild, moderate, severe                                                                          |
| Cough                         | YES/NO                                                    | 1 day, 2 days, 3 days, 4+ days                                                 | YES/NO                                             | mild, moderate, severe                                                                          |
| Feeling more tired than usual | YES/NO                                                    | 1 day, 2 days, 3 days, 4+ days                                                 | YES/NO                                             | mild, moderate, severe                                                                          |
| Chills or sweats              | YES/NO                                                    | 1 day, 2 days, 3 days, 4+ days                                                 | YES/NO                                             | mild, moderate, severe                                                                          |
| Sore throat                   | YES/NO                                                    | 1 day, 2 days, 3 days, 4+ days                                                 | YES/NO                                             | mild, moderate, severe                                                                          |
| Headache                      | YES/NO                                                    | 1 day, 2 days, 3 days, 4+ days                                                 | YES/NO                                             | mild, moderate, severe                                                                          |
| Muscle or body aches          | YES/NO                                                    | 1 day, 2 days, 3 days, 4+ days                                                 | YES/NO                                             | mild, moderate, severe                                                                          |
| Runny or stuffy nose          | YES/NO                                                    | 1 day, 2 days, 3 days, 4+ days                                                 | YES/NO                                             | mild, moderate, severe                                                                          |
| Shortness of breath           | YES/NO                                                    | 1 day, 2 days, 3 days, 4+ days                                                 | YES/NO                                             | mild, moderate, severe                                                                          |
| Vomiting                      | YES/NO                                                    | 1 day, 2 days, 3 days, 4+ days                                                 | YES/NO                                             | mild, moderate, severe                                                                          |

### General exposure

In the next section, the questions are going to be about being **in contact** with people who seemed to have a cold or the flu. **In contact** means being within two meters of them for at least two minutes or physical contact for any amount of time.

1  
2  
3 *For reference, two meters is about the distance between you and someone sitting two rows*  
4 *ahead of you on the bus.*  
5

6 **In the past week, have you been in contact with a person who seemed to have a cold or**  
7 **flu?**

- 8 ● Yes
- 9 ● No
- 10 ● Don't know
- 11
- 12

13 **[If YES] Were they coughing or sneezing?**

- 14 ○ Yes
- 15 ○ No
- 16 ○ Don't know
- 17
- 18

19 **In the past week, have you been in contact with any children under five years old for over**  
20 **an hour?**

- 21 ● No contact with children under 5 yrs
- 22 ● 1 child
- 23 ● 2-5 children
- 24 ● More than 5 children
- 25 ● Don't know
- 26
- 27

28 **Are there any children under 18 years old in your household?**

- 29 ● Yes
- 30 ● No
- 31 ● Don't know
- 32
- 33

34 **[If YES] Do any children in your household attend a school, childcare setting, or**  
35 **play group with at least three other children for a total of three or more hours per**  
36 **week?**

- 37 ● Yes
- 38 ● No
- 39 ● Don't know
- 40
- 41

42 **How many people live in your household (including you)?**

- 43 ● 1-2
- 44 ● 3-4
- 45 ● 5-7
- 46 ● 8+
- 47

48 **How many bedrooms are in your home?**

- 49 ● 0-1
- 50 ● 2
- 51 ● 3
- 52 ● 4
- 53 ● 5+
- 54

55 **Influenza vaccination**  
56  
57  
58  
59  
60

We would like to ask you some questions about your influenza vaccination history. This information will be used to determine how effective the vaccine is.

**Did you receive an influenza vaccination this year (2019\*)?**

- Yes
- No
- Do not know
- I've never received an influenza vaccination.

**[If YES] what was the approximate date of your influenza vaccination?**

- Choose month and year starting from January 2019\* up to the current month

**[If YES] Did you receive a free influenza vaccination under the National Immunisation Program in 2019\*?**

- Yes
- No
- Do not know

[If YES] What medical condition(s) do you have that made you eligible for a free influenza vaccination?

- Free text field

[If Answer to above is something other than: "I've never received an influenza vaccination"] Did you receive an influenza vaccination last year (2018\*)?

- Yes
- No
- Do not know

**General health**

Next we'd like to ask you some questions about your overall health:

**Have you ever been told by a doctor that you have one of the following medical conditions? (SELECT ALL THAT APPLY)**

- Asthma
- COPD/emphysema
- Diabetes
- Heart disease
- None of these
- Do not know

**Are you a healthcare (or aged care) worker (i.e. do you directly work with patients/aged care residents in your job)?**

- Yes
- No
- Do not know

**Do you smoke tobacco?**

- Yes
- No

1  
2  
3  
4 **Does anyone in your household smoke tobacco?**

- 5 ● Yes  
6 ● No  
7

8 **Is your illness preventing you from going to work or school, going to social events, or exercising/working out?**

- 9  
10  
11 ● Yes  
12 ● No  
13

14 **Are you currently taking antibiotics (e.g. Amoxil, penicillin, azithromycin, co-trimoxazole (Bactrim), co-amoxiclav (Augmentin)) or antivirals (e.g. Tamiflu, Xofluza, Relenza) prescribed by a doctor (GP or hospital) for this illness?**

- 15  
16  
17 ● Yes  
18 ● No  
19 ● Do not know  
20

21 **How old are you?**

- 22 ● 18 to 19  
23 ● 20 to 24  
24 ● 25 to 29  
25 ● 30 to 34  
26 ● 35 to 39  
27 ● 40 to 44  
28 ● 45 to 49  
29 ● 50 to 54  
30 ● 55 to 59  
31 ● 60 to 64  
32 ● 65 to 69  
33 ● 70 to 74  
34 ● 75 to 79  
35 ● 80 to 84  
36 ● 85 to 89  
37 ● 90 and older  
38  
39  
40

41 **What is the sex on your medical records?**

- 42 ● Male  
43 ● Female  
44 ● Indeterminate/Other  
45 ● Prefer not to say  
46

47 **How would you describe your race?** Please select all that apply.

- 48 ● Aboriginal  
49 ● Torres Strait Islander  
50 ● Pacific Islander  
51 ● North or East Asian  
52 ● African  
53 ● European  
54 ● White Australian  
55  
56  
57  
58  
59  
60



- South or Central American
- Middle East/North African
- Indian subcontinent
- Other

[The next question is asked after the flu rapid test is complete]

**Nice job! Do you feel you performed all of the steps in the flu test correctly? Select the most applicable option**

- It was easy to follow and I think I completed the test correctly
- It was a little confusing but I think I did the test correctly
- It was very confusing and I'm not sure I completed the test correctly
- During the test, I realized I did something incorrectly

*\* All questions with an asterisk listed by the year will be updated in the mobile app in January 2020 (i.e. questions referring to "this year" will list 2020 instead of 2019.)*

## Appendix D: Follow-Up Survey Variables

| Category                                                                        | Questions asked                                                                                                                                                                                                             |
|---------------------------------------------------------------------------------|-----------------------------------------------------------------------------------------------------------------------------------------------------------------------------------------------------------------------------|
| Health behaviors and attitudes                                                  | I believe taking an active role in my own care is the most important factor in determining my health.*                                                                                                                      |
|                                                                                 | I am confident that I can identify when it is necessary to get medical care versus when I can handle the problem myself.*                                                                                                   |
|                                                                                 | I often think carefully about whether health information makes sense in my particular situation.*                                                                                                                           |
|                                                                                 | I acknowledge that I have a key role in the day-to-day management of my health.*                                                                                                                                            |
|                                                                                 | I often need someone to help me when I receive written information from my GP, nurse or pharmacist.*                                                                                                                        |
|                                                                                 | In general, I believe the state of my health is:**                                                                                                                                                                          |
|                                                                                 | I am confident that I can tell my GP concerns I have even when he/she does not ask about them.*                                                                                                                             |
|                                                                                 | I like to find out a lot of information about health online.*                                                                                                                                                               |
|                                                                                 | I am confident that I can follow through on medical treatments I need to do at home.*                                                                                                                                       |
|                                                                                 | I value my health more than anything else.*                                                                                                                                                                                 |
|                                                                                 | My health needs are always met from available healthcare resources.*                                                                                                                                                        |
|                                                                                 | As well as seeing my GP, I regularly monitor (check for) changes in my health.*                                                                                                                                             |
|                                                                                 | I do what is necessary to keep myself healthy.*                                                                                                                                                                             |
| My GP and I work together to make decisions about what's best for my health.*** |                                                                                                                                                                                                                             |
|                                                                                 |                                                                                                                                                                                                                             |
| Experience/                                                                     | The purpose of using flu@home was to:<br><div style="display: flex; justify-content: space-between; align-items: center;"> <span>_____</span> <span>Yes</span> <span>_____</span> <span>No</span> <span>_____</span> </div> |

|                                                         |                                                                                                               |                       |                       |
|---------------------------------------------------------|---------------------------------------------------------------------------------------------------------------|-----------------------|-----------------------|
| usability                                               | Test for flu                                                                                                  | <input type="radio"/> | <input type="radio"/> |
|                                                         | Give me information about flu and medicine                                                                    | <input type="radio"/> | <input type="radio"/> |
|                                                         | Test different flu medicines                                                                                  | <input type="radio"/> | <input type="radio"/> |
|                                                         | Participate in a research study about the flu                                                                 | <input type="radio"/> | <input type="radio"/> |
|                                                         | I am satisfied with how easy it was to use flu@home (nasal swab test and app).*                               |                       |                       |
|                                                         | I had the skills needed to perform swab testing using flu@home.*                                              |                       |                       |
|                                                         | I was able to understand the results from the flu@home app.*                                                  |                       |                       |
|                                                         | The instructions for using flu@home were helpful in providing me with what I needed to perform the test.*     |                       |                       |
|                                                         | Using flu@home <b>app</b> was:****                                                                            |                       |                       |
|                                                         | Doing the flu@home <b>nasal swab test</b> was:****                                                            |                       |                       |
| Entering my information into the flu@home app was: **** |                                                                                                               |                       |                       |
| Impact/<br>perceived<br>value                           | I would recommend flu@home to a friend or family member.*                                                     |                       |                       |
|                                                         | My GP was very supportive of me using flu@home.*                                                              |                       |                       |
|                                                         | It saves time to do a home-based test like flu@home before visiting a healthcare provider.*                   |                       |                       |
|                                                         | I feel that flu@home could help me better manage my illness.*                                                 |                       |                       |
| Intention to<br>Act                                     | If flu@home testing indicated you had the flu, which of the following would you consider doing as next steps? |                       |                       |
|                                                         |                                                                                                               | I would consider      |                       |
|                                                         |                                                                                                               | Yes                   | No                    |
|                                                         | A virtual consultation with a provider (telemedicine visit)                                                   | <input type="radio"/> | <input type="radio"/> |
|                                                         | Sharing my results anonymously with a national flu tracking system                                            | <input type="radio"/> | <input type="radio"/> |

|  |                                                                                                                                                 |                       |                       |
|--|-------------------------------------------------------------------------------------------------------------------------------------------------|-----------------------|-----------------------|
|  | Reading flu@home tips on how to prevent flu spread                                                                                              | <input type="radio"/> | <input type="radio"/> |
|  | Encouraging others in my household to use flu@home for testing                                                                                  | <input type="radio"/> | <input type="radio"/> |
|  | I would use the flu@home kit in the future if I have symptoms.*                                                                                 |                       |                       |
|  | I would do the flu@home test if I could purchase the test kit online to send to my home, rather than see my healthcare provider for diagnosis.* |                       |                       |

\* Responses on Likert scale anchored with 'Strongly Disagree' and 'Strongly Agree'

\*\* Responses on Likert scale anchored with 'Very Poor' and 'Excellent'

\*\*\* Responses on Likert scale anchored with 'Never' and 'Always'

\*\*\*\* Responses on Likert scale anchored with 'Very Easy' and 'Very Difficult'
